# Supplementary material for: A genome-wide association study identifies multiple loci for variation in human ear morphology
Source: PubMed Central journal article supplement (PMC4491814; doi:10.1038/ncomms8500), 2015-06-24
Supplement: ncomms8500-s1.pdf [file ncomms8500-s1.pdf]

## SUPPLEMENTARY FIGURES

Supplementary Figure 1: Categorical phenotyping protocol for the pinna traits examined

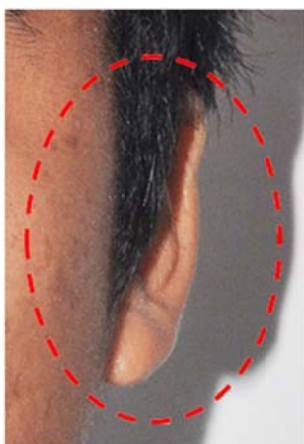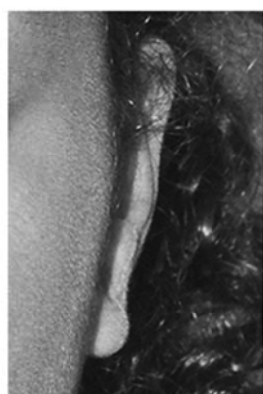

0

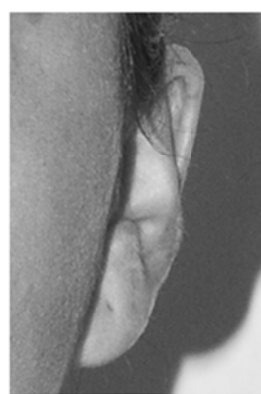

1

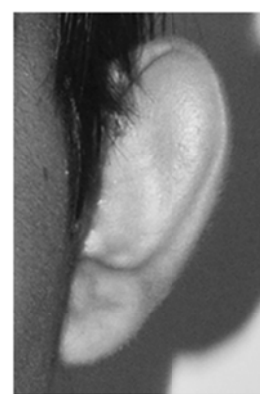

2

1. Ear Protrusion

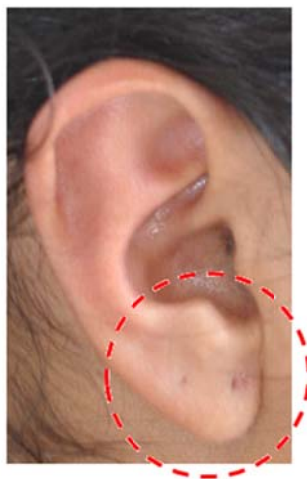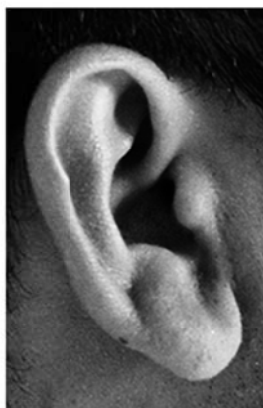

0

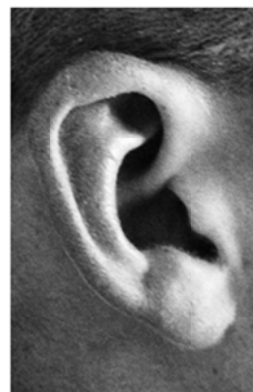

1

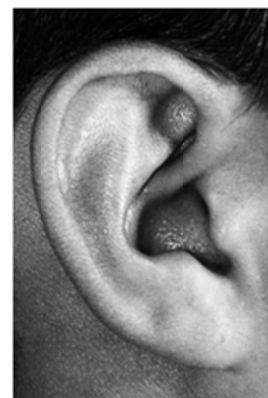

2

2. Lobe Attachment

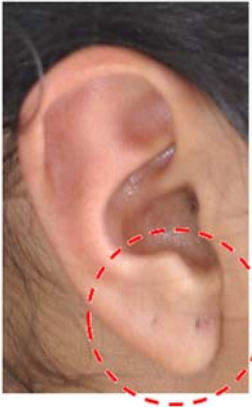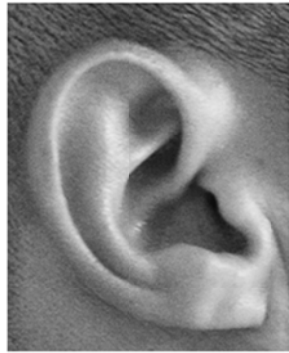

0

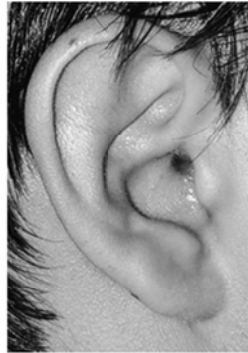

1

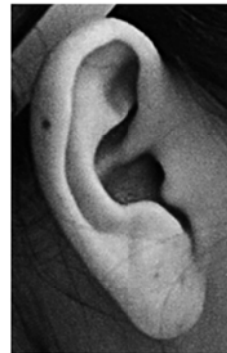

2

3. Lobe Size

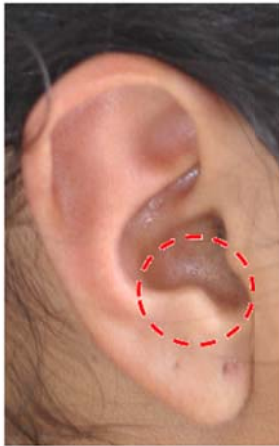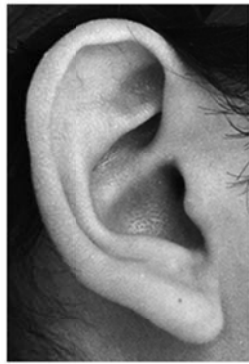

0

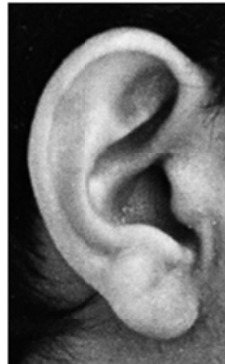

1

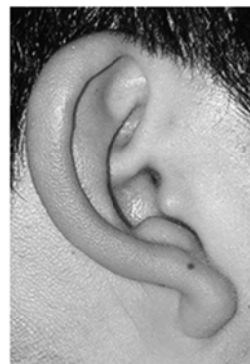

2

4. Antitragus Size

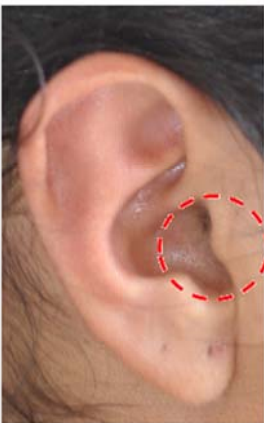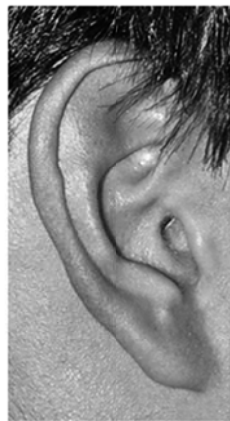

0

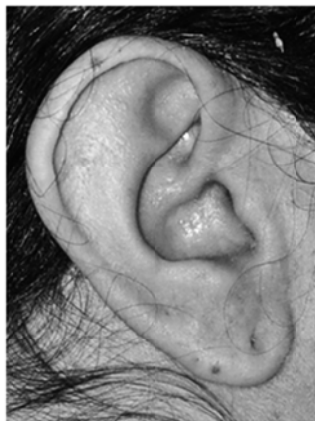

1

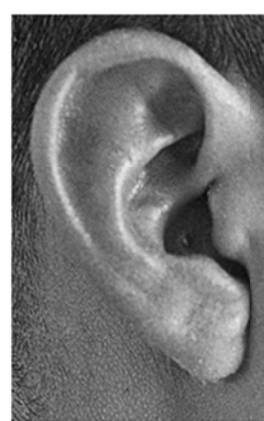

2

5. Tragus Size

2

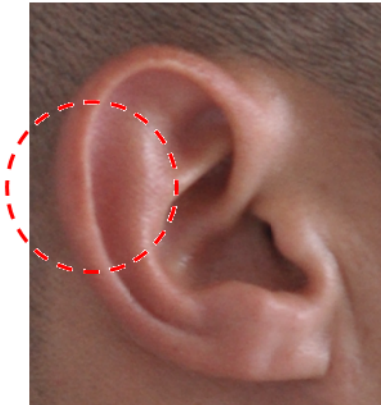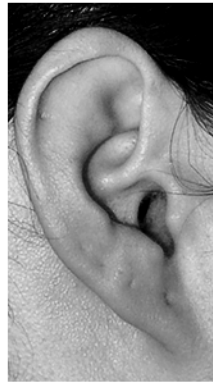

0

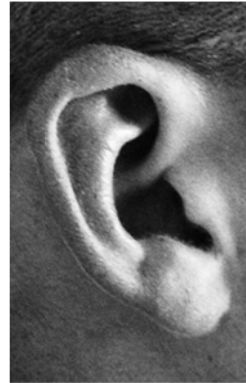

1

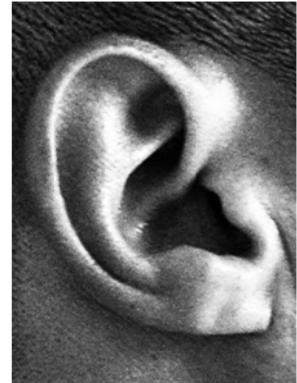

2

6. Helix Rolling

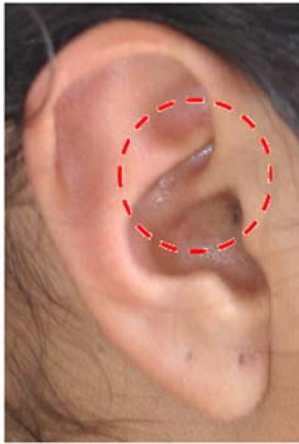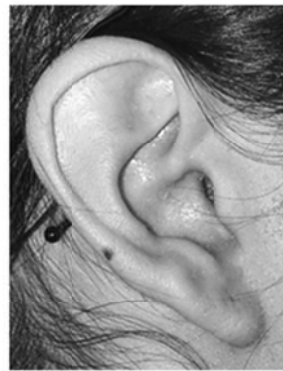

0

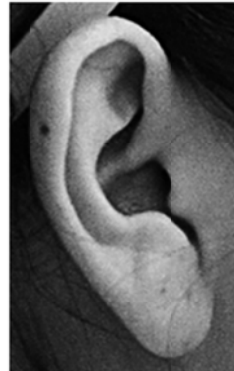

1

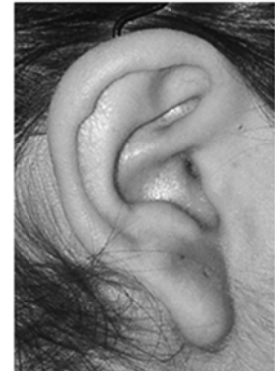

2

7. Crus Helix Expression

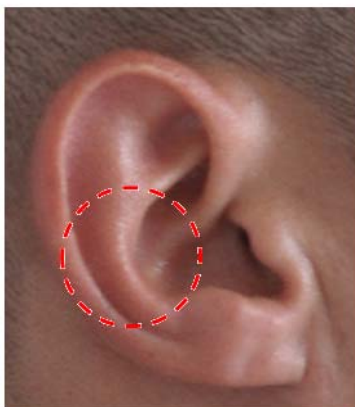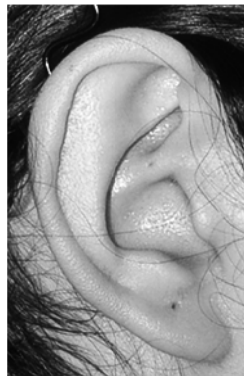

0

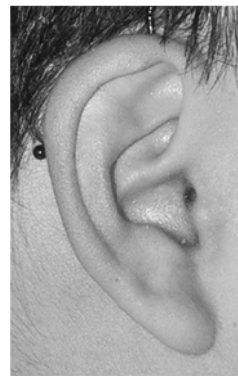

1

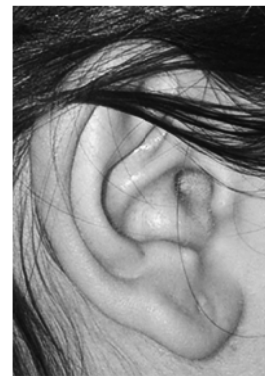

2

8. Folding of Antihelix



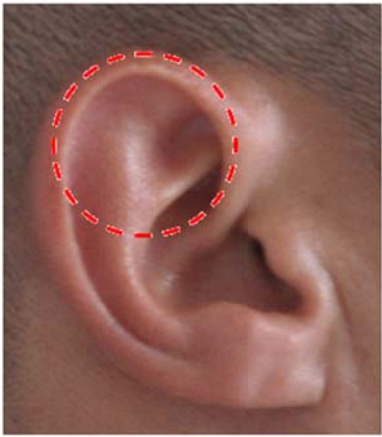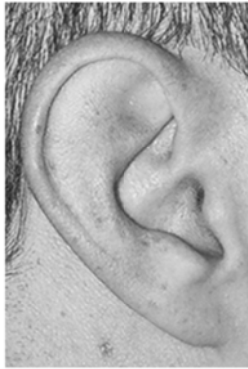

0

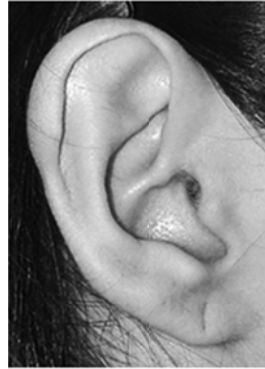

1

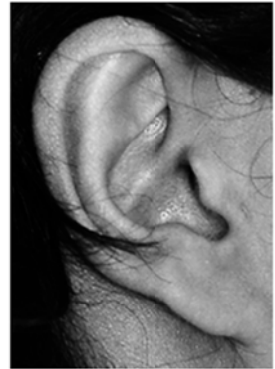

2

9. Superior Crus of Antihelix Expression

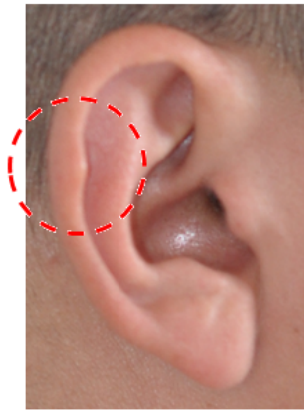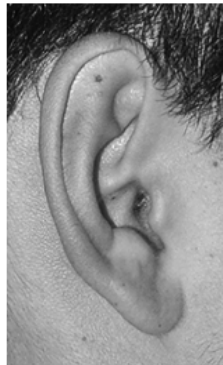

0

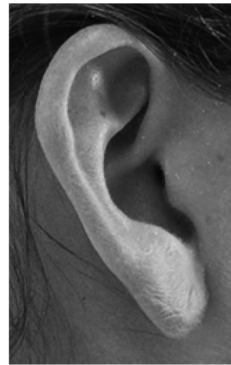

1

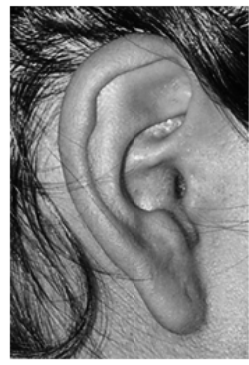

2

10. Darwin's Tubercle

### Supplementary Figure 2: Frequency distribution of 10 pinna traits in the CANDELA sample

Ten pinna traits (Figure 1) were examined in 5,062 individuals and scored on a three point scale reflecting the degree of expression of the trait. The bar chart below shows the frequency (%) of the 3 categories for each trait examined in the CANDELA sample.

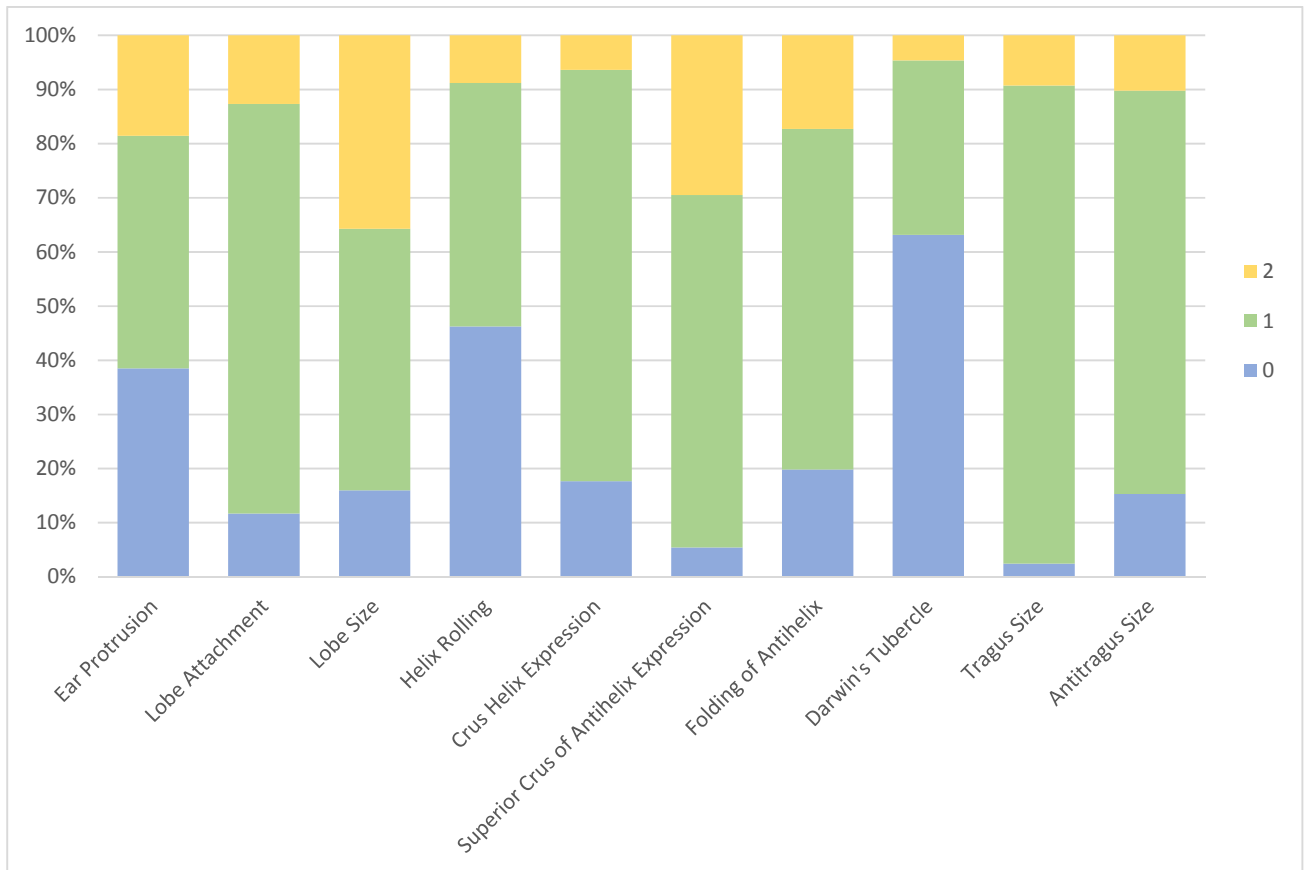

### Supplementary Figure 3: Continental ancestry in the CANDELA sample

African, European and Native American ancestry values were estimated from a set of 93,328 autosomal SNPs (LD-pruned from the full chip data) via supervised runs of the Admixture software (Alexander et al. 2009). Reference populations for African and European groups were chosen from HAPMAP and from selected Native American populations as described in Ruiz-Linares et al (2014).

Individual ancestry barplots for each country are shown below. Individuals within each country are sorted by their American ancestry proportion.

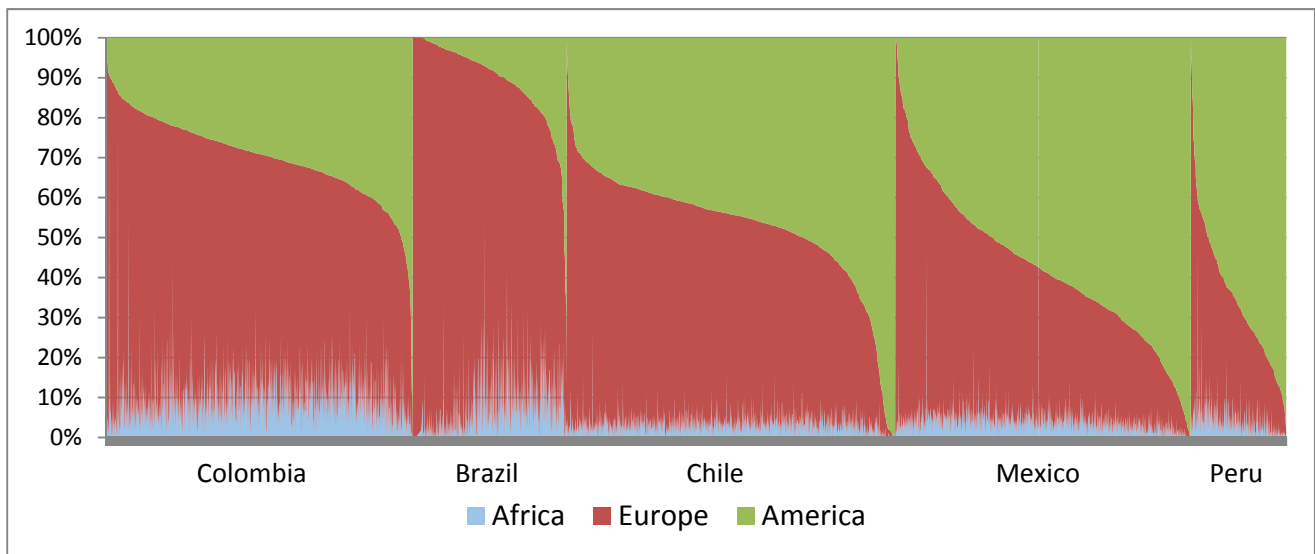

Mean ancestry estimates for each country and overall are:

|          | Africa | Europe | America |
|----------|--------|--------|---------|
| Colombia | 7.8%   | 62.7%  | 29.5%   |
| Brazil   | 6.1%   | 84.5%  | 9.4%    |
| Chile    | 1.8%   | 49.5%  | 48.7%   |
| Mexico   | 2.9%   | 38.2%  | 58.9%   |
| Peru     | 3.0%   | 29.6%  | 67.4%   |
| Overall  | 4.3%   | 53.0%  | 42.7%   |

Ref: Supplementary Reference 1 & 2.

## Supplementary Figure 4: Selection of genetic Principal Components for inclusion in the GWAS analyses

### A) Scree Plot:

Principal components were extracted from an LD-pruned SNP dataset (see methods). The proportion of the variance explained by each PC is shown below.

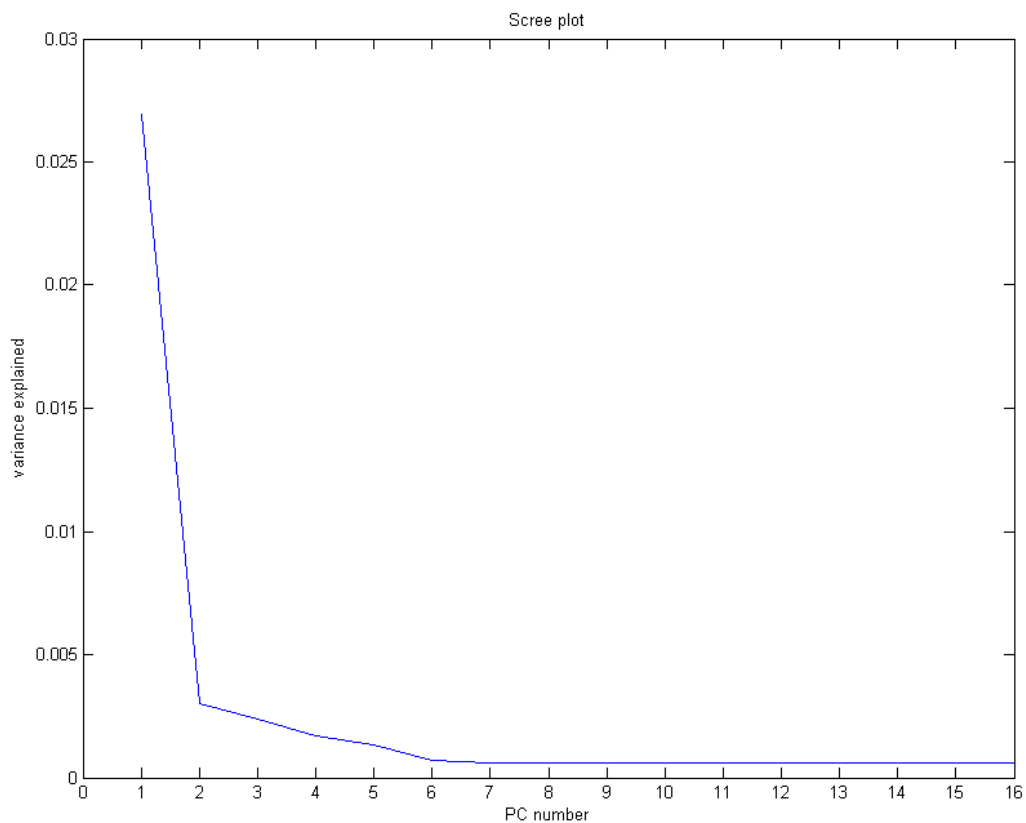

### B) GWAS Q-Q plot without PC adjustment:

Q-Q plots were produced from the GWAS test statistics, without correction for population substructure through adjustment with principal components, to examine inflation of test statistics. There was indeed inflation for all traits, as the genomic control inflation factor  $\lambda$  was  $> 2$  in all cases. A sample Q-Q plot for *Tragus Size* is shown below.

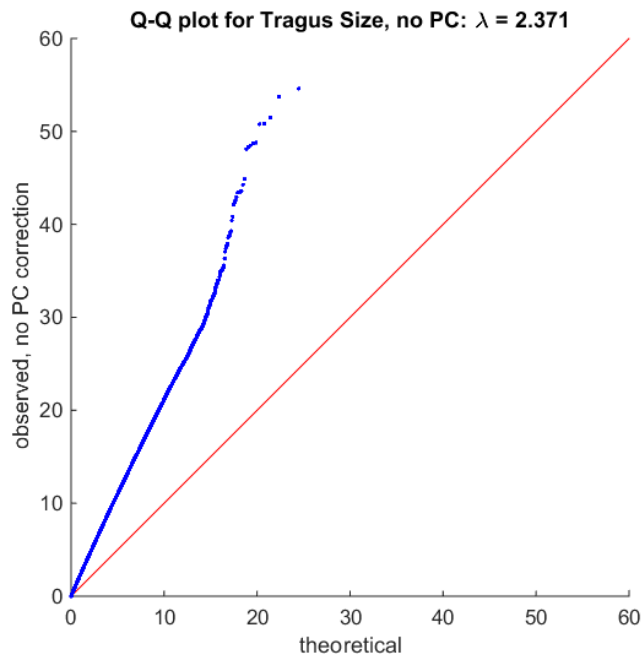

C) Manhattan plot for Tragus Size without PC adjustment:

GWAS Manhattan plot for Tragus Size is shown below. As expected from the strong inflation seen in Q-Q plot above, many SNPs are above significance level.

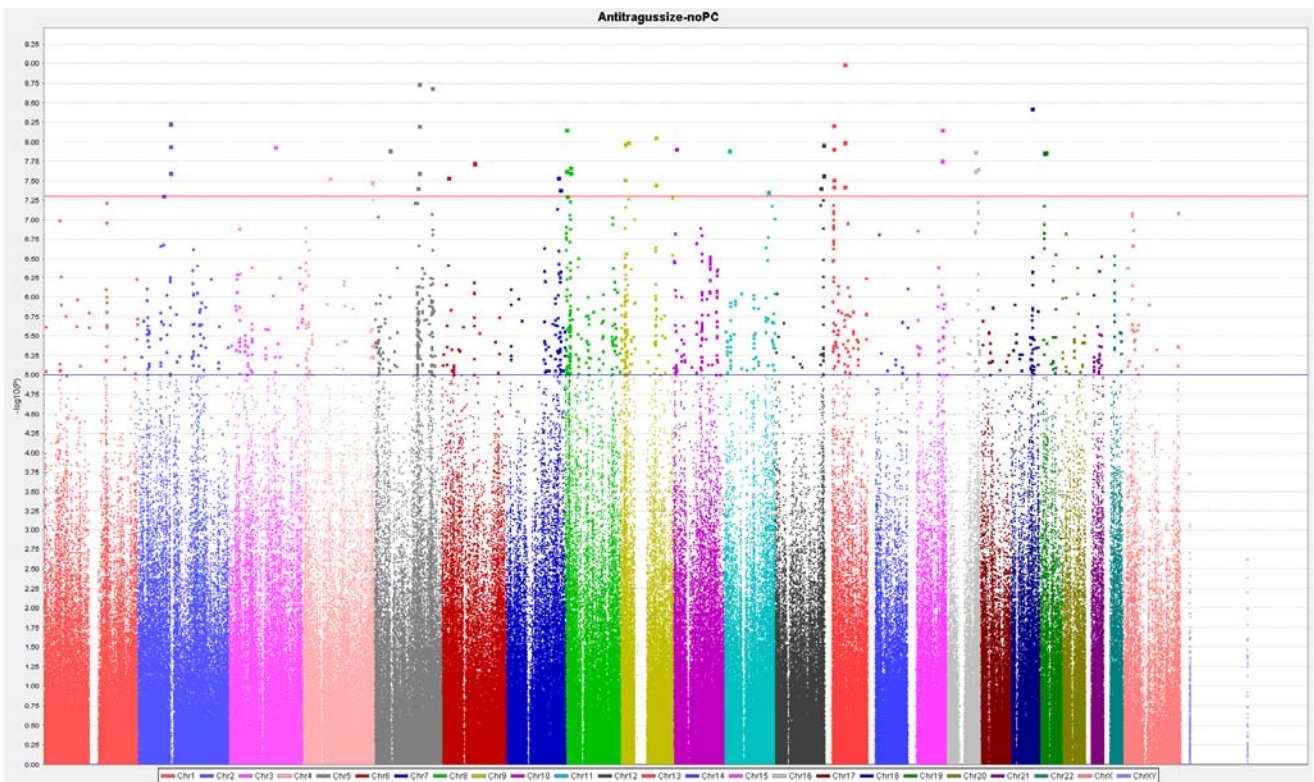



#### D) Manhattan plot for Tragus Size with genomic control adjustment:

GWAS test statistics obtained above were normalized by the genomic control adjustment method by dividing with the inflation factor. Now all SNPs fell below significance level, as expected, since the adjustment factor was very high. This should be compared with the Manhattan plot for Tragus Size obtained after correction with 5 PCs, shown subsequently. It retains the 'real' association signal in chromosome 1, which is lost when a blanket correction on all SNPs is performed by genomic control. This demonstrates the superiority of the PC correction approach.

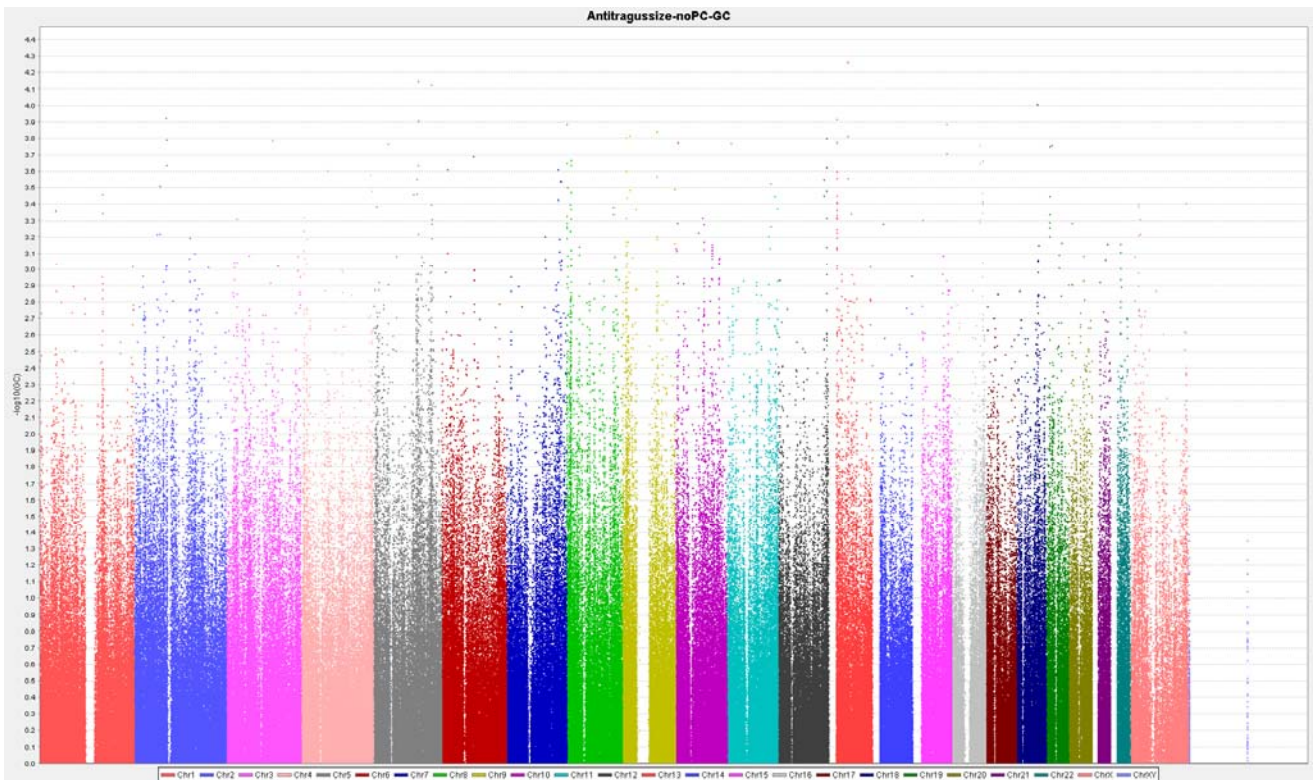

#### E) GWAS Q-Q plot with 5 PCs:

Q-Q plots were produced from the GWAS test statistics, to check if population substructure correction with 5 PCs is sufficient. Plots showed no noticeable deviation from expectation (a sample plot, for tragus size, is shown below). The genomic control inflation factor lambda was calculated in each case. All lambda values were < 1.03, indicating that correction with 5 PCs is sufficient.

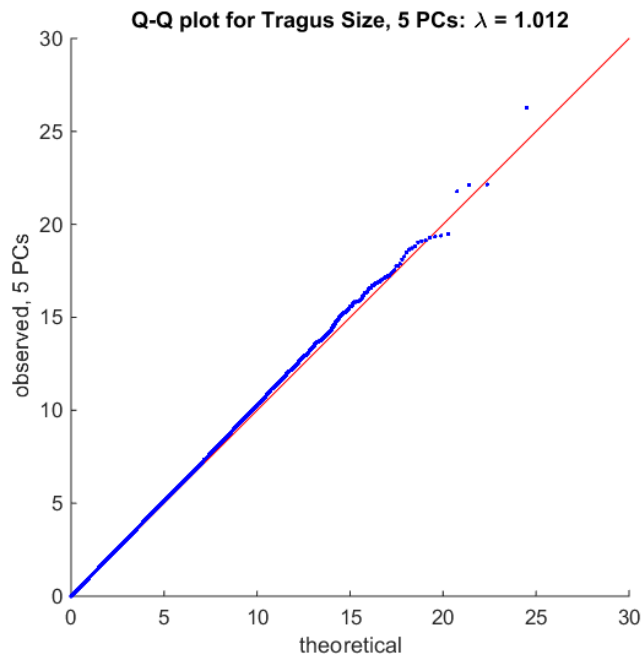

F) Manhattan plot for Tragus Size with genomic control adjustment:

This GWAS Manhattan plot, as discussed earlier, retains the strong association signal in chromosome 1, while removing the other spurious associations arising from population substructure.

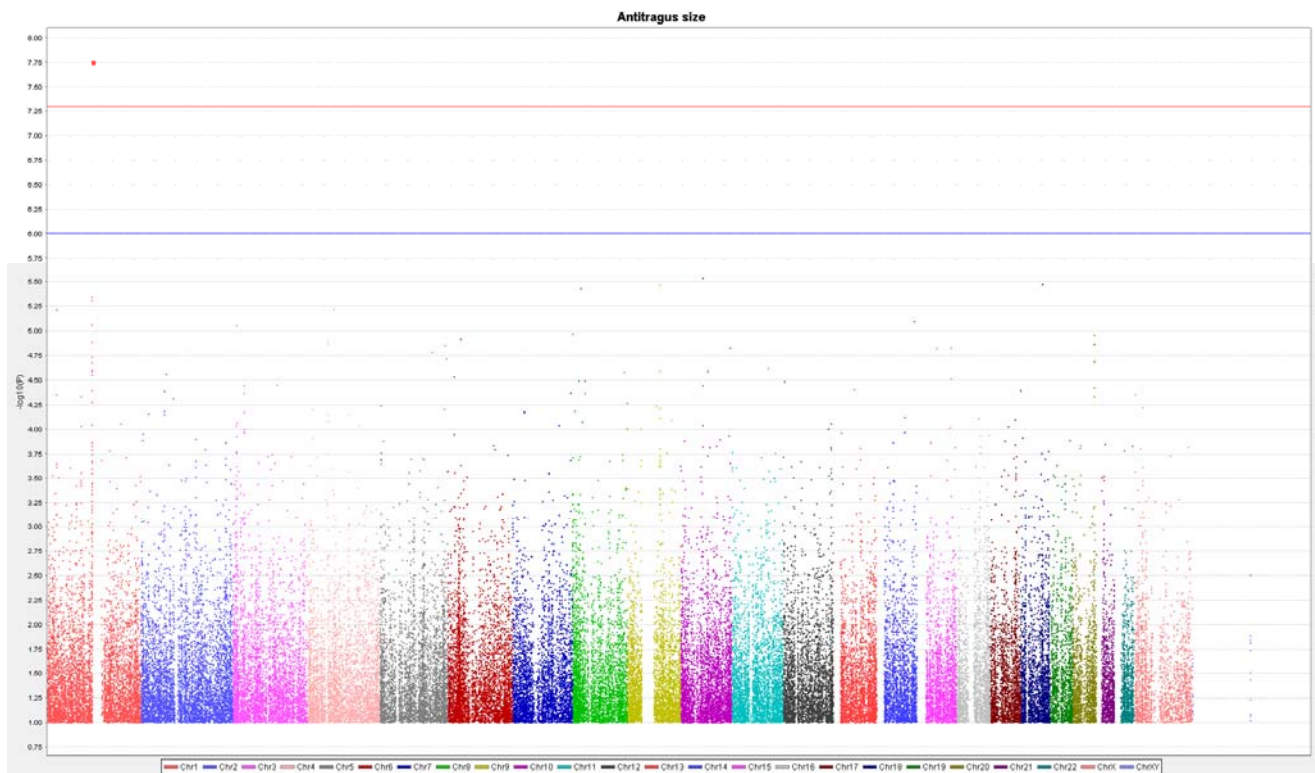

G) GWAS Q-Q plot with 10 PCs:

To ensure that inclusion of higher PCs does not have any noticeable effect, the GWASs were re-run with 10 PCs. There were no difference between the runs with 5 or 10 PCs; the ratios of lambda from both runs were very close to 1 for all traits. Below a sample Q-Q plot for tragus size is provided, comparing the test statistic values for runs with 5 and 10 PCs:

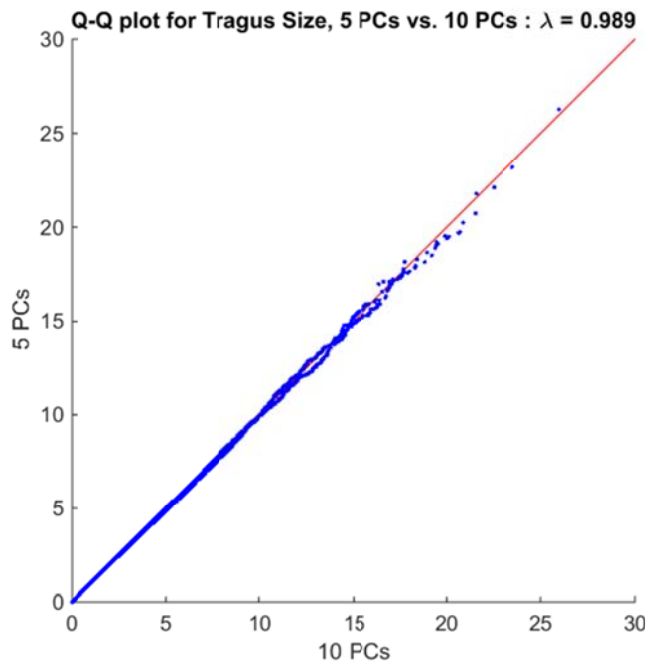

Supplementary Figure 5: GWAS combining the ten pinna traits in MultiPhen

Multivariate regression tests combining all pinna traits examined into a single model were carried out using MultiPhen (see methods). The Manhattan plot below summarizes the results obtained. The same set of regions showed genome-wide significant association as for the tests carried out for each phenotype independently.

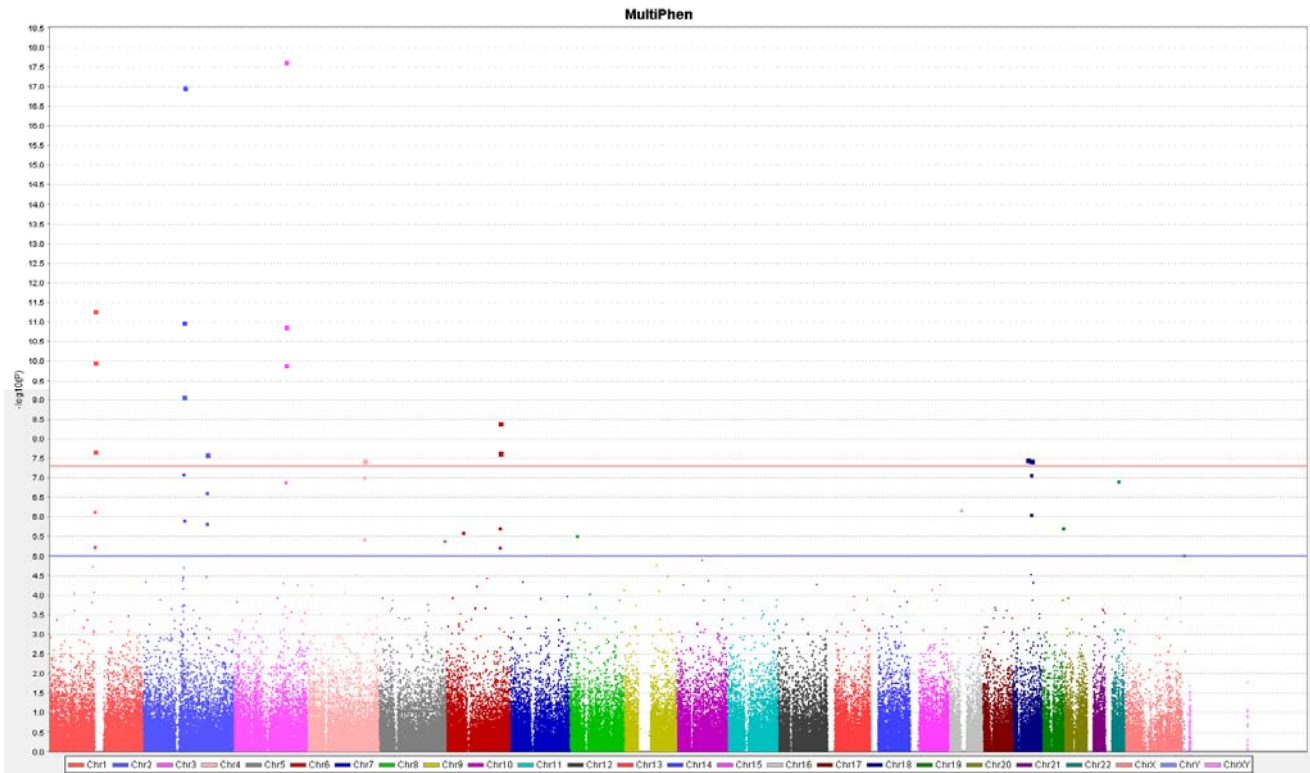

P-values obtained from MultiPhen (via a multivariate logistic regression) for index SNP in each associated region:

| Region  | SNP        | P-value  |
|---------|------------|----------|
| 1p12    | rs17023457 | 5.01E-12 |
| 2q12.3  | rs3827760  | 1.26E-11 |
| 2q31.1  | rs2080401  | 2.51E-08 |
| 3q23    | rs10212419 | 1.78E-11 |
| 4q31.3  | rs1960918  | 4.17E-08 |
| 6q24.2  | rs263156   | 4.90E-09 |
| 18q21.2 | rs1619249  | 3.80E-08 |

## Supplementary Figure 6: Meta-analysis Plots

### A) Forest Plots for Country-stratified Meta-analysis

Forest plots are shown below for all SNPs and traits in Table 1. Meta-analysis p-values are presented in Supplementary Table 6. The coefficient value in each country is shown by a blue box marker (marker size being proportional to sample size for that country). The red markers indicate meta-analysis estimated effect size. Horizontal bars on each side of the markers indicate standard errors. Traits with genome-wide significant meta-analysis p-values are highlighted with a green box around the sub-figure.

*rs17023457:*

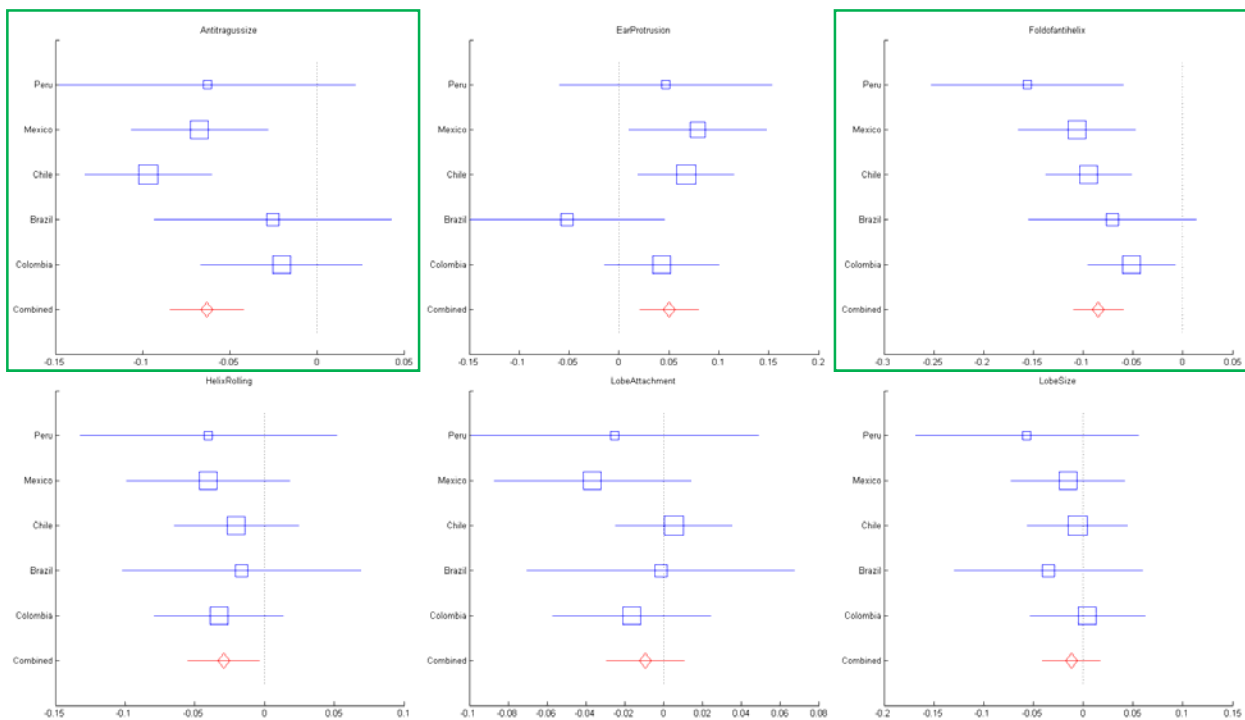



rs3827760:

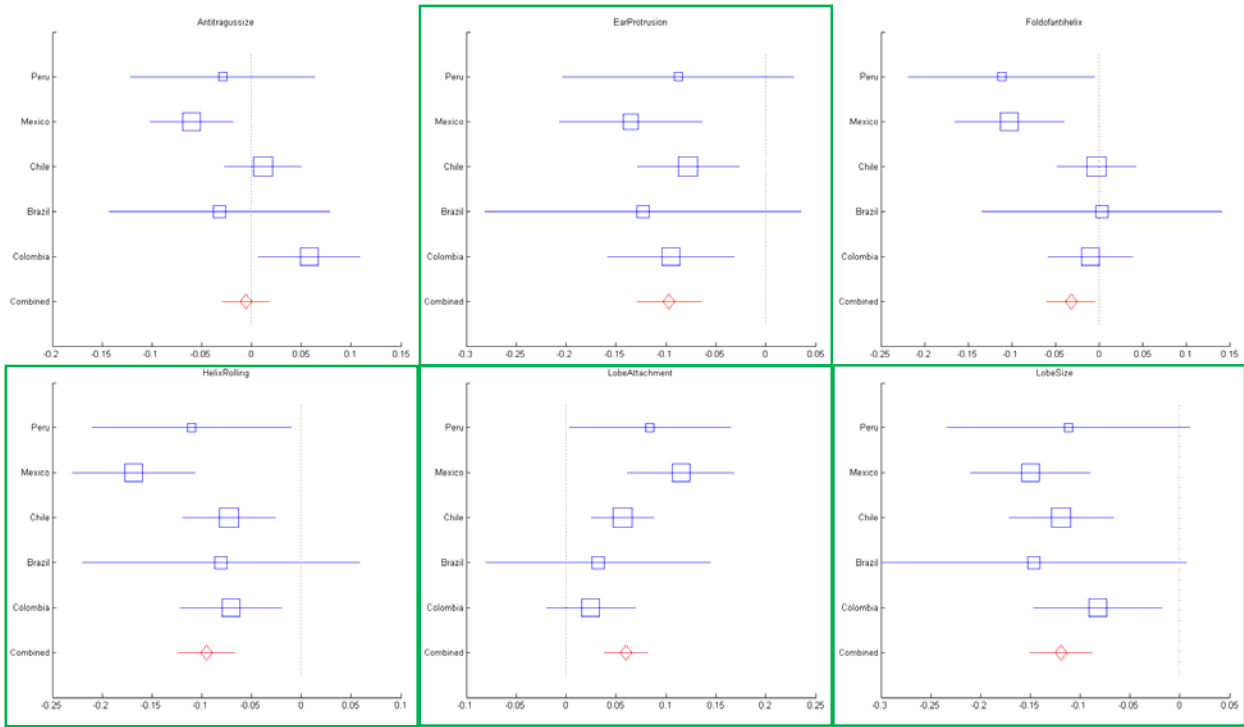

rs2080401:

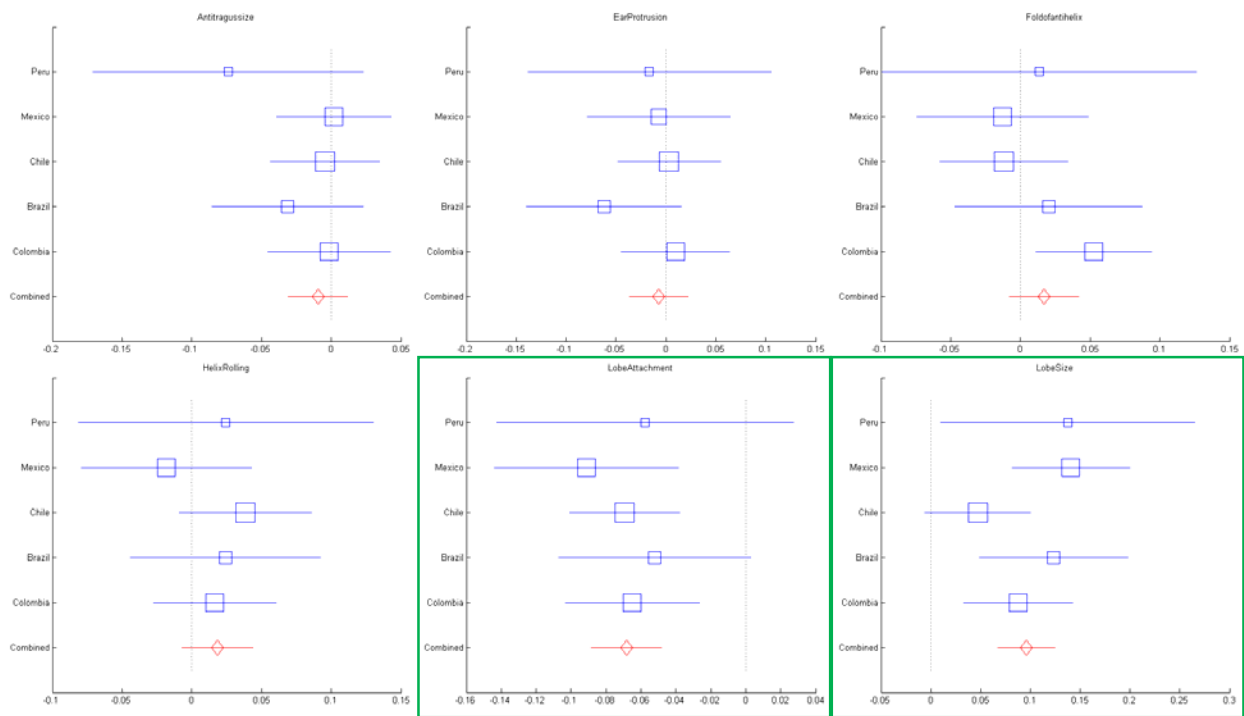

rs10212419:

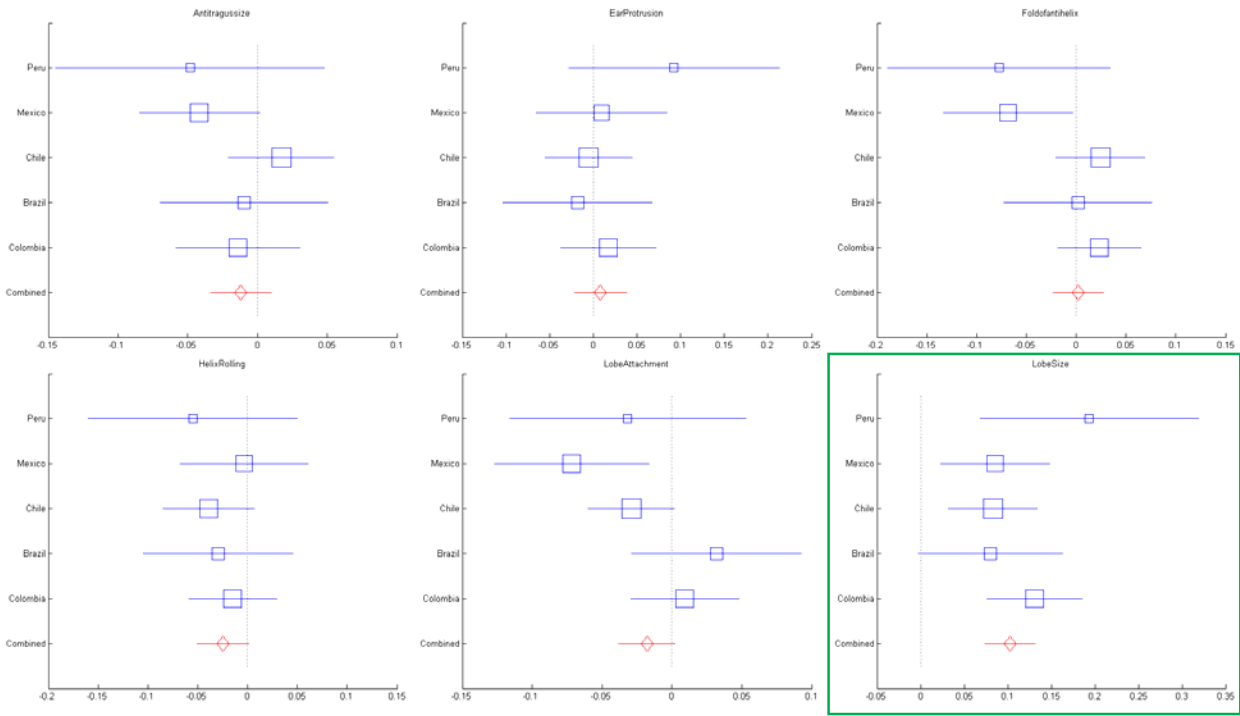

rs1960918:

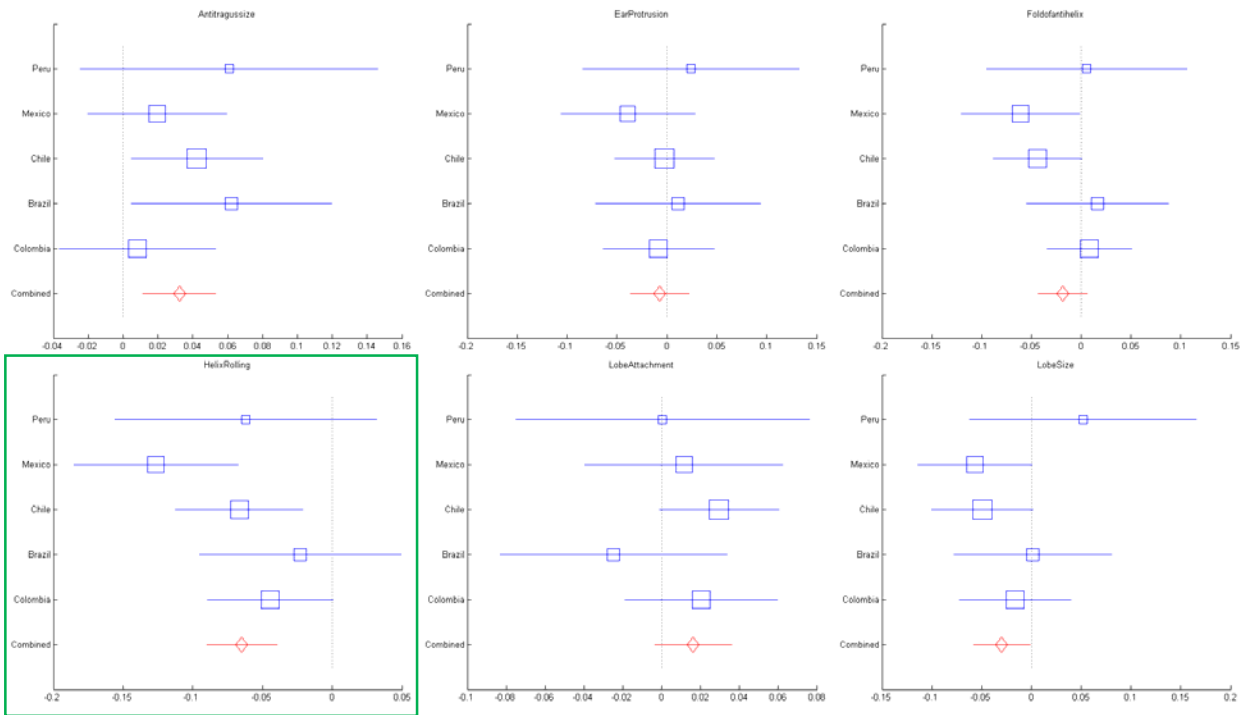

rs263156:

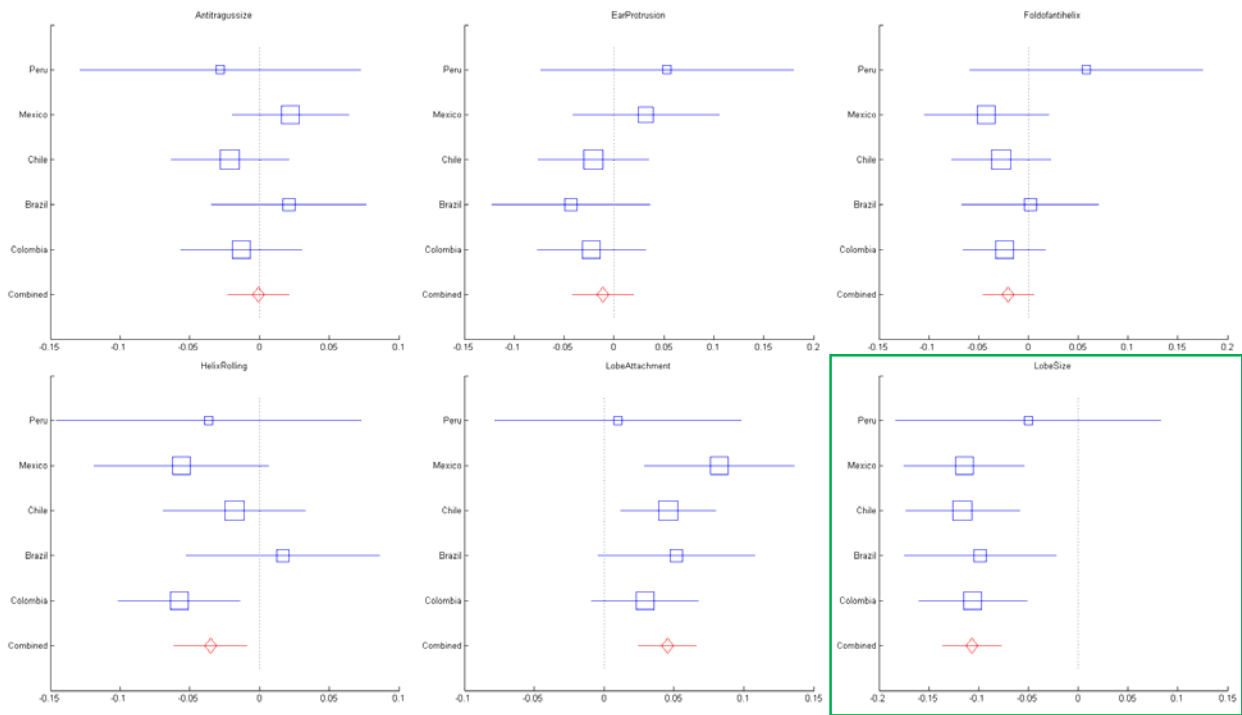

rs1619249:

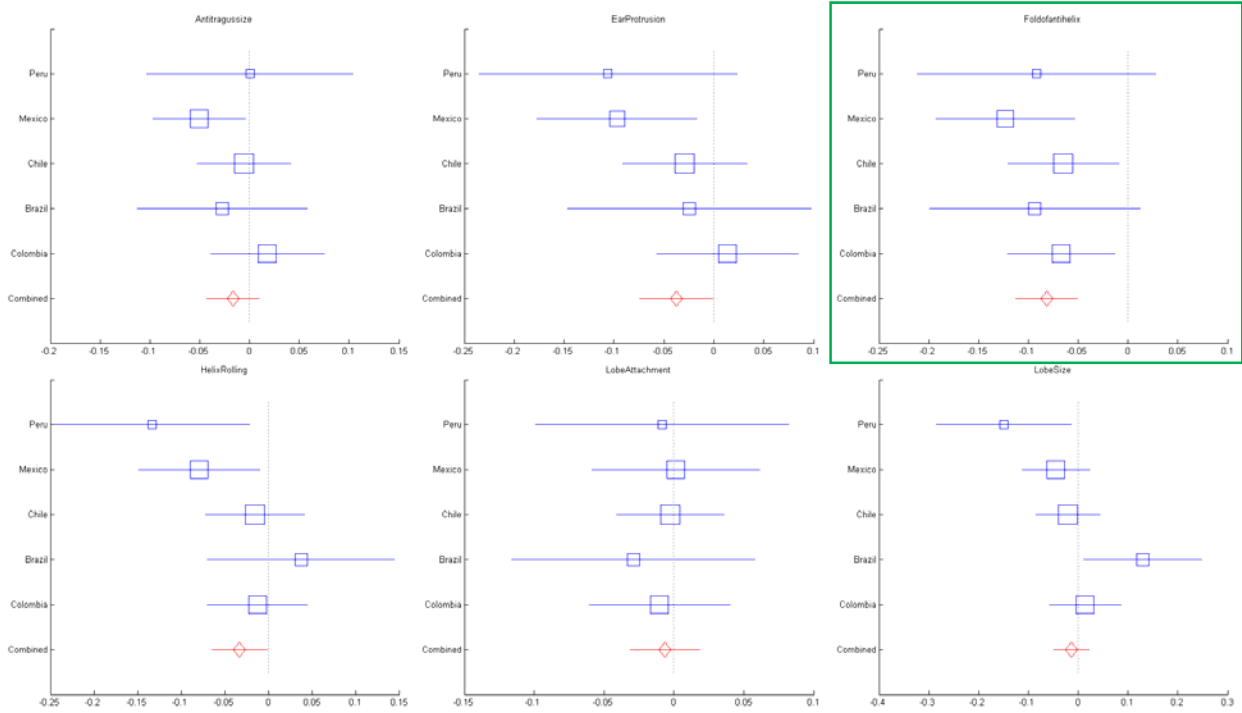

## B) Manhattan Plots for Country- stratified Meta-analysis

Manhattan plots are shown below for all SNPs and traits in Table 1.

### Ear Protrusion:

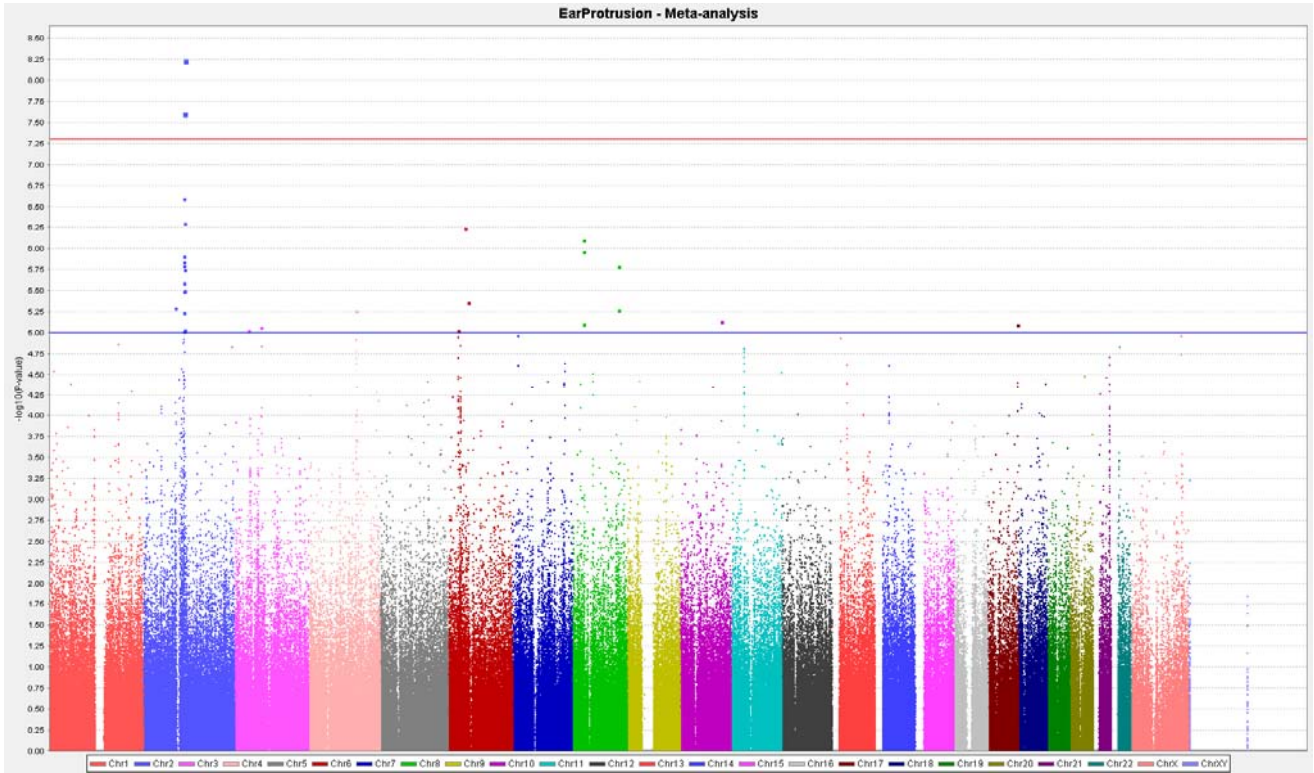

Antitragus Size:

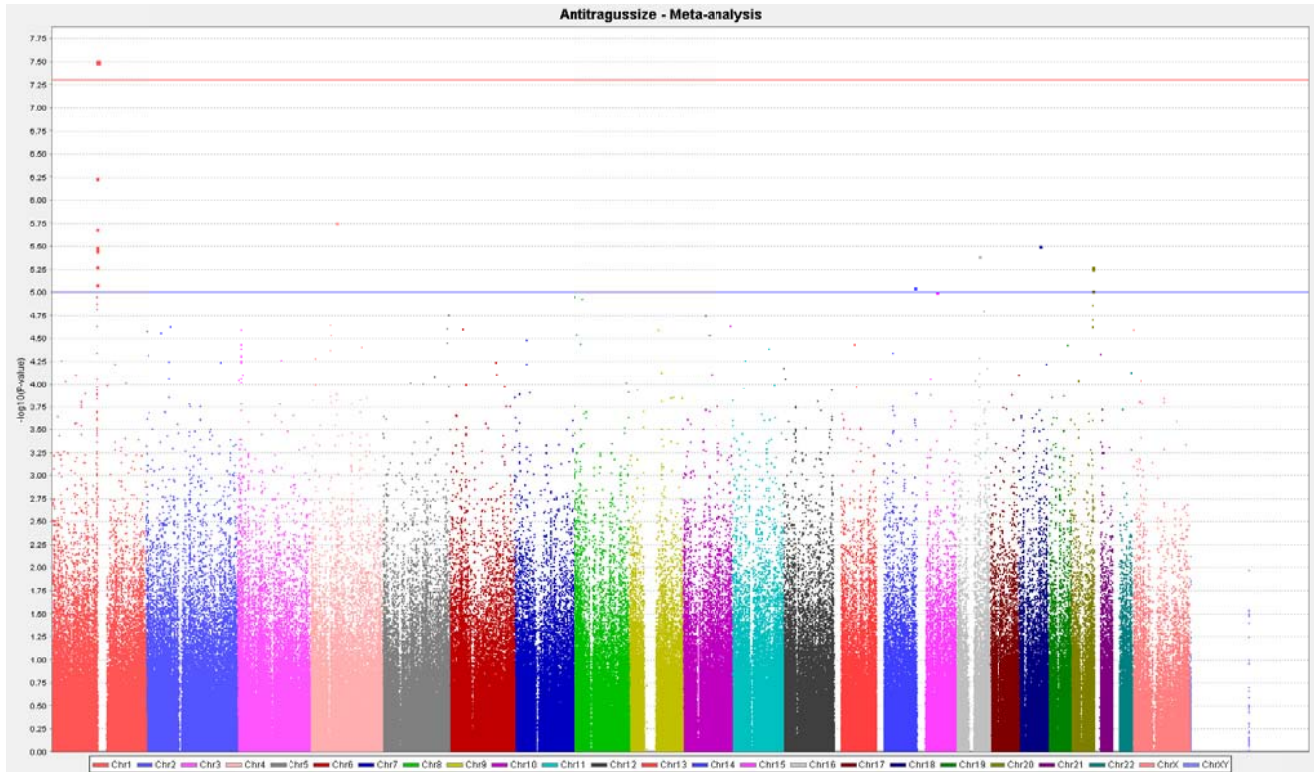

Folding of Antihelix:

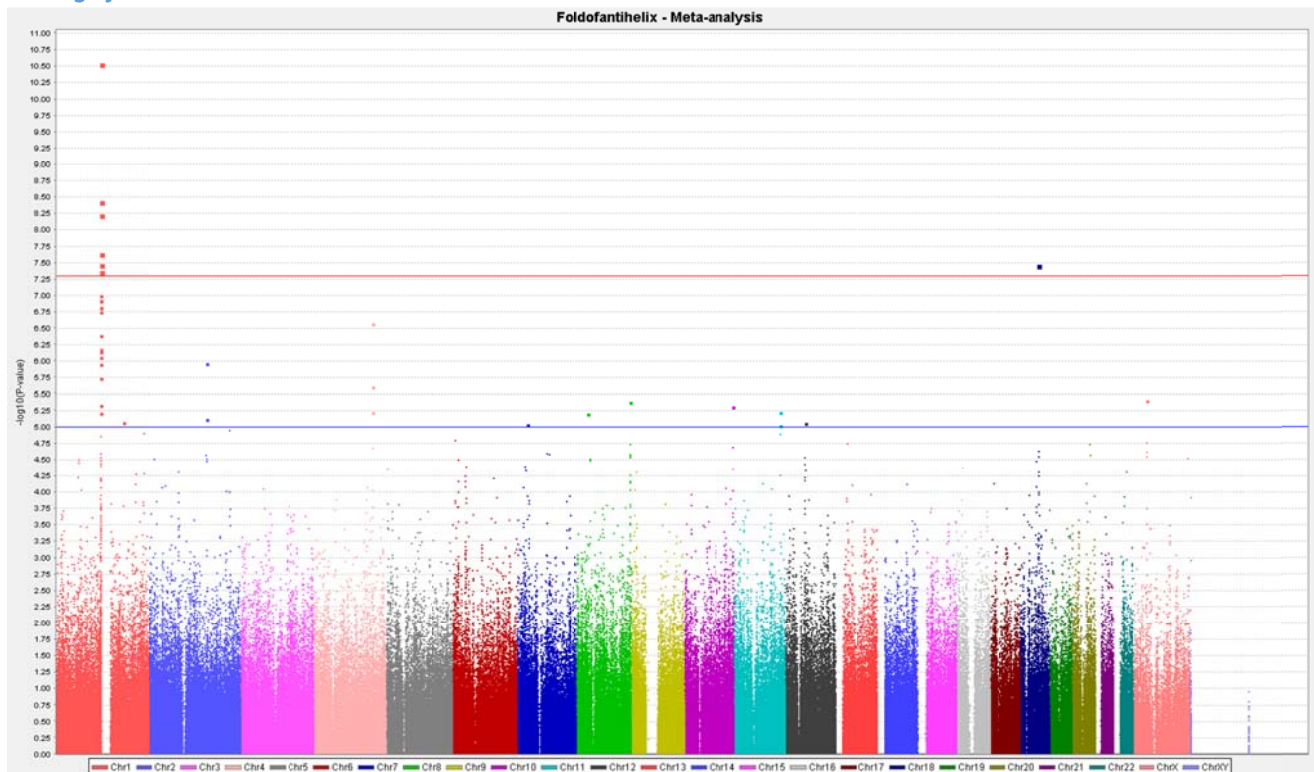



Helix Rolling:

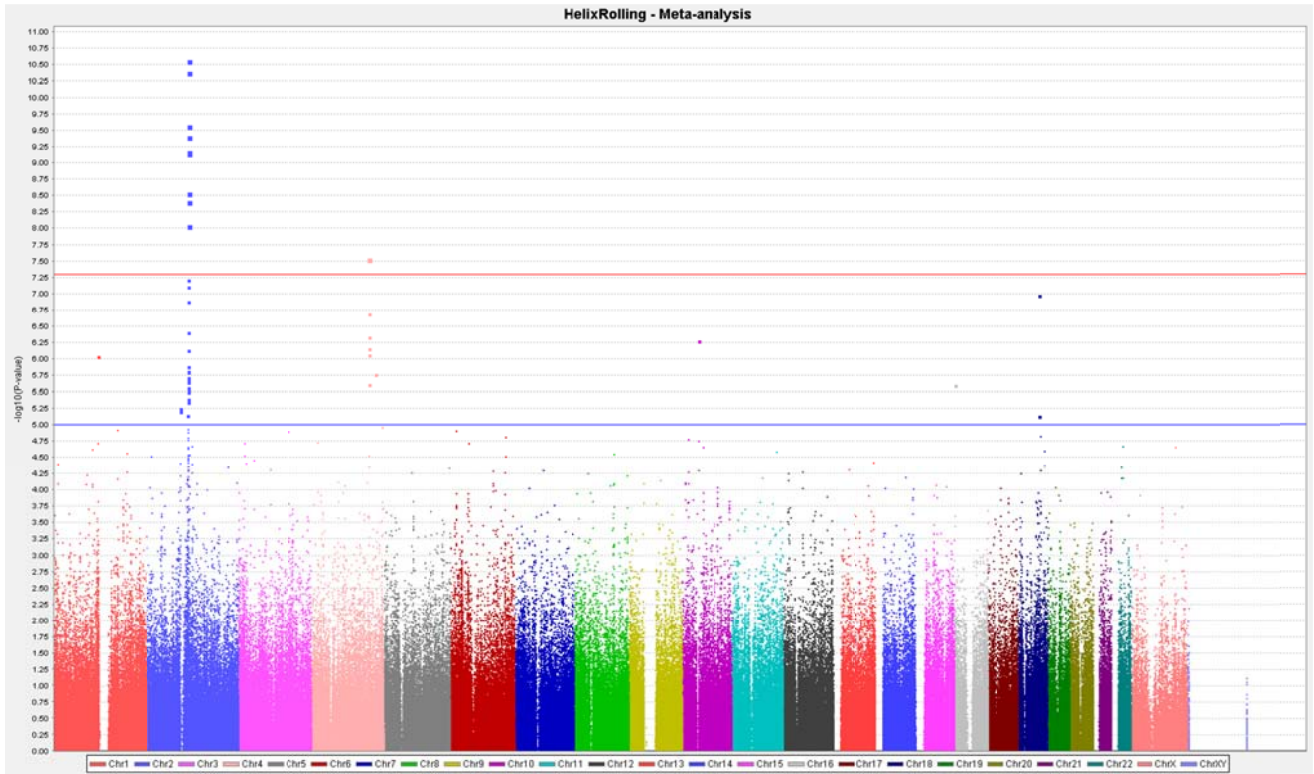

Lobe Attachment:

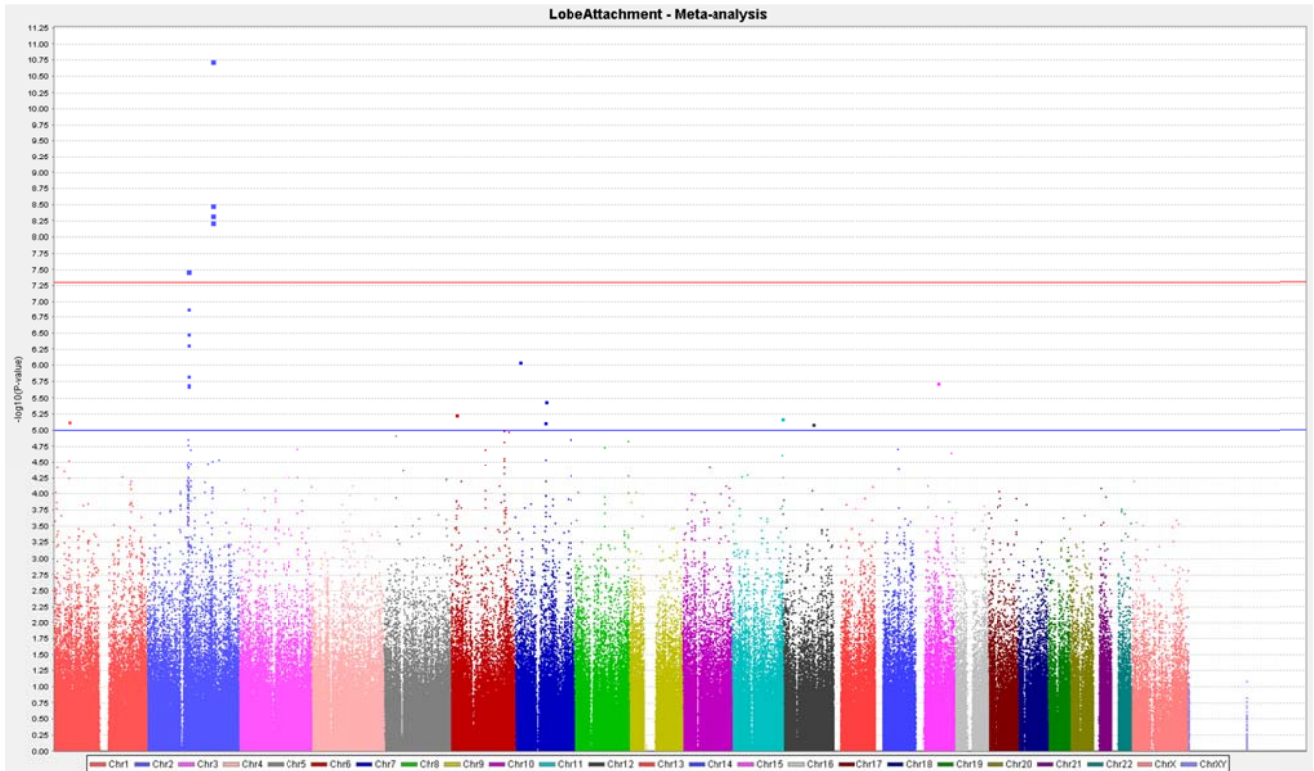

Lobe Size:

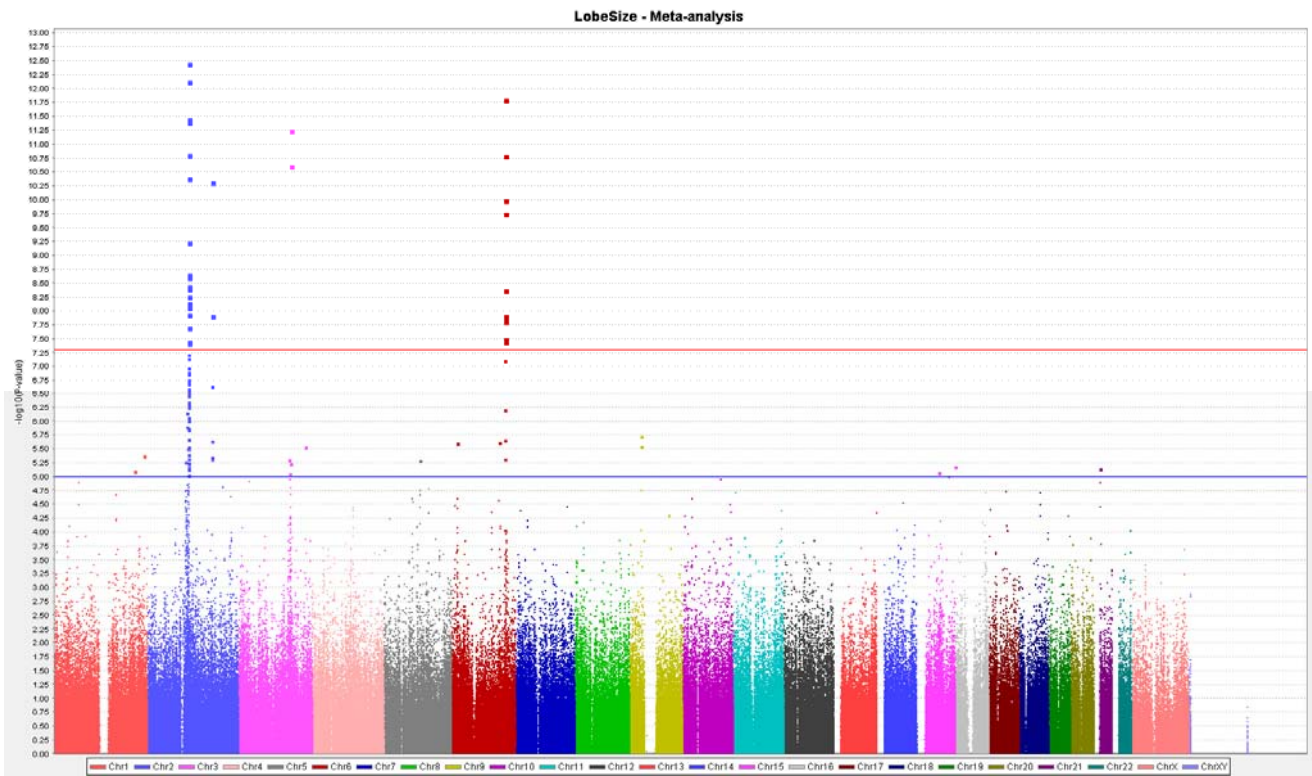

### C) Manhattan Plots for Sex- stratified Meta-analysis

Manhattan plots are shown below for all SNPs and traits in Table 1.

#### *Ear Protrusion:*

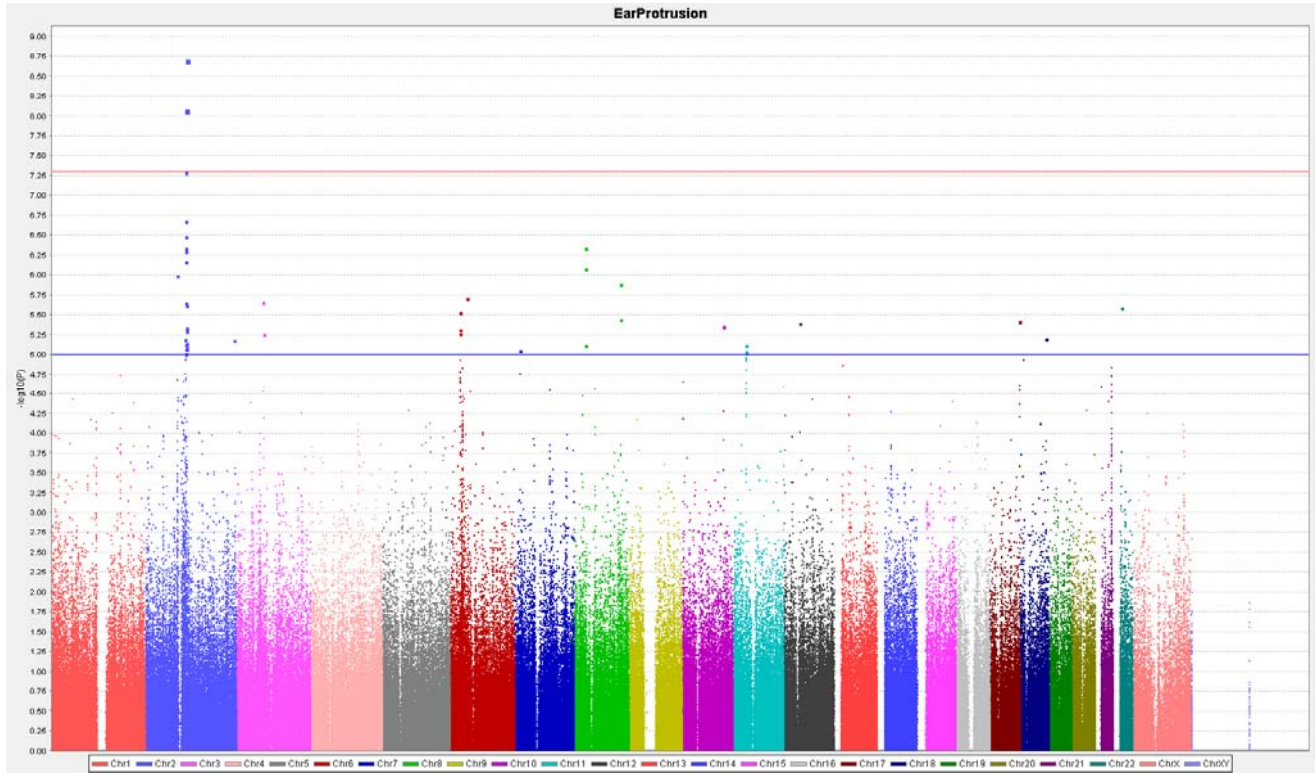



Antitragus Size:

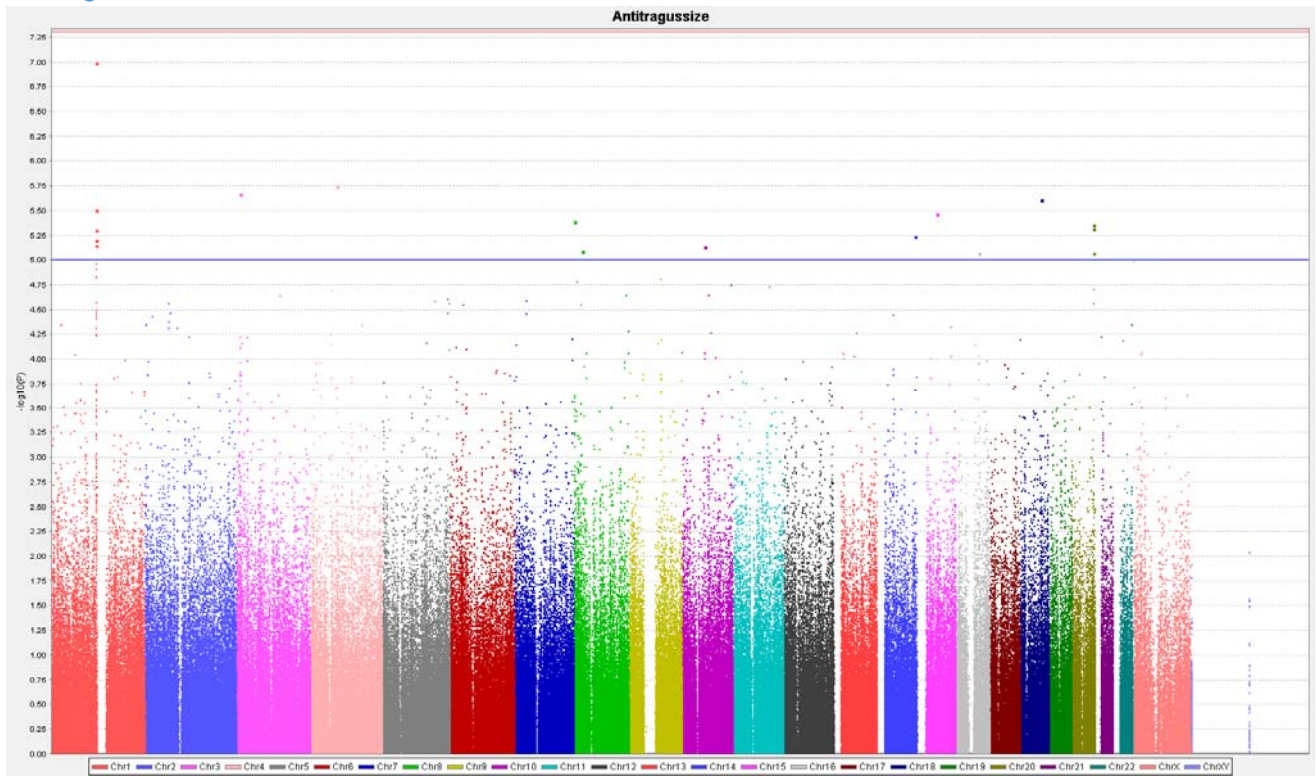

Folding of Antihelix:

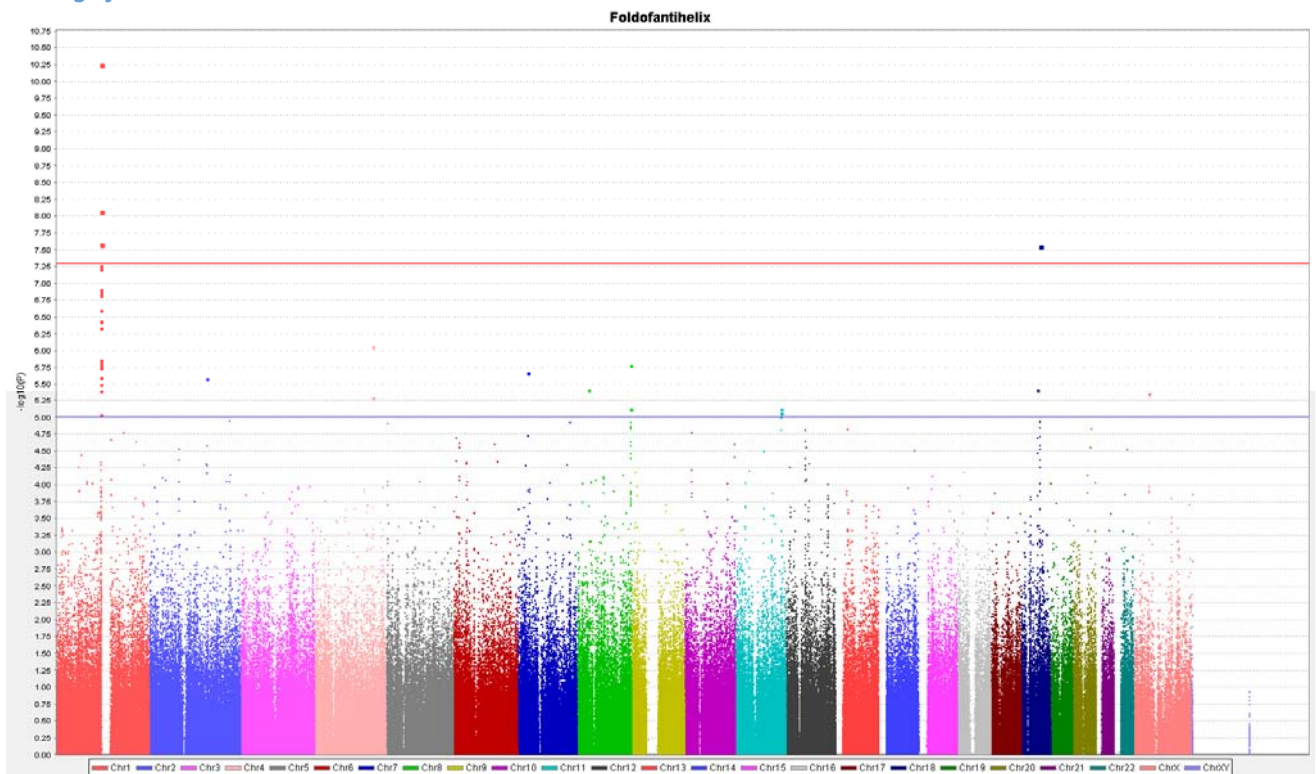

Helix Rolling:

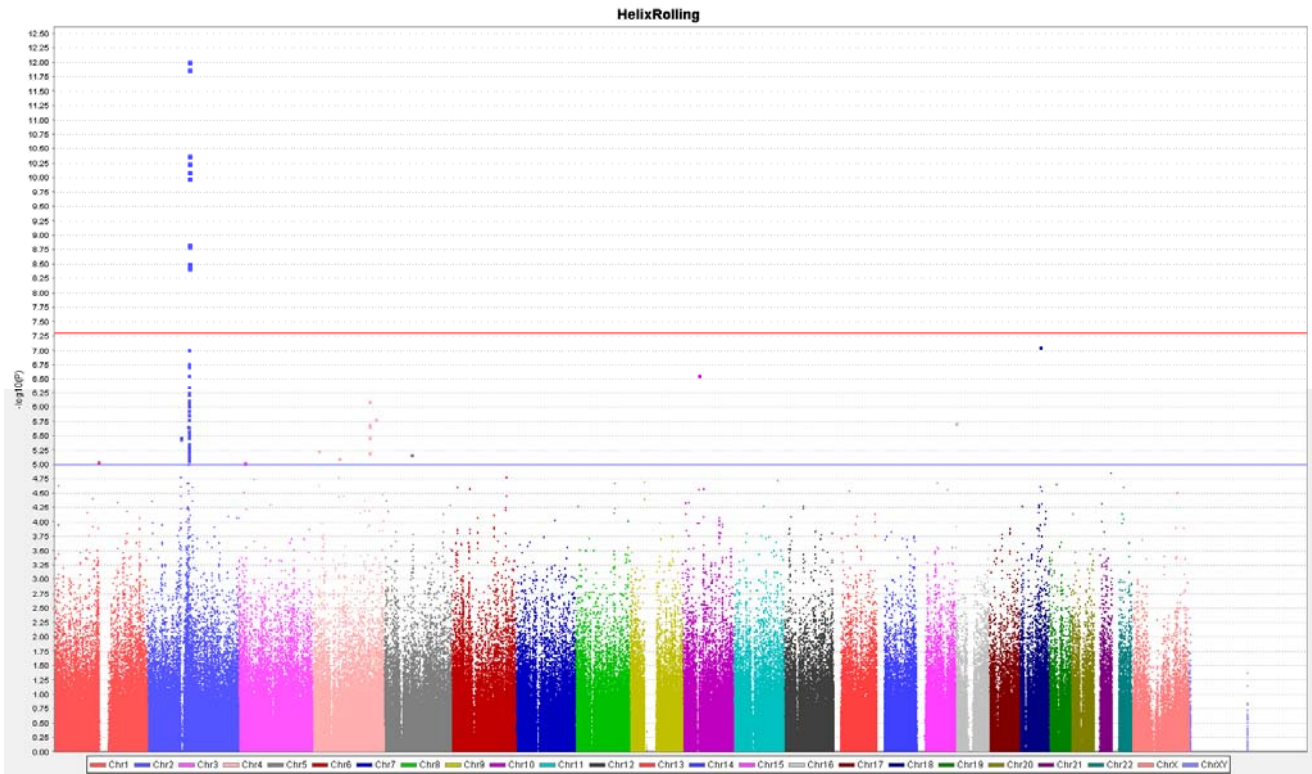

Lobe Attachment:

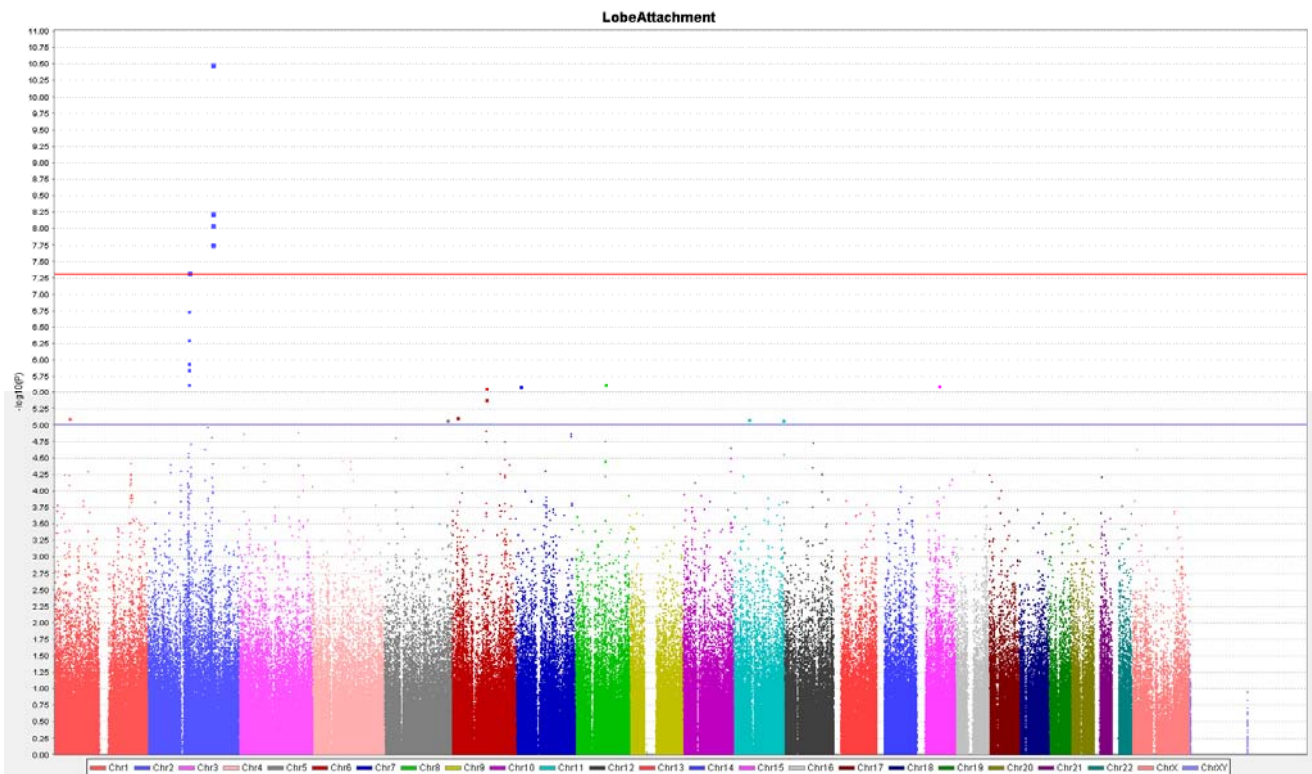



Lobe Size:

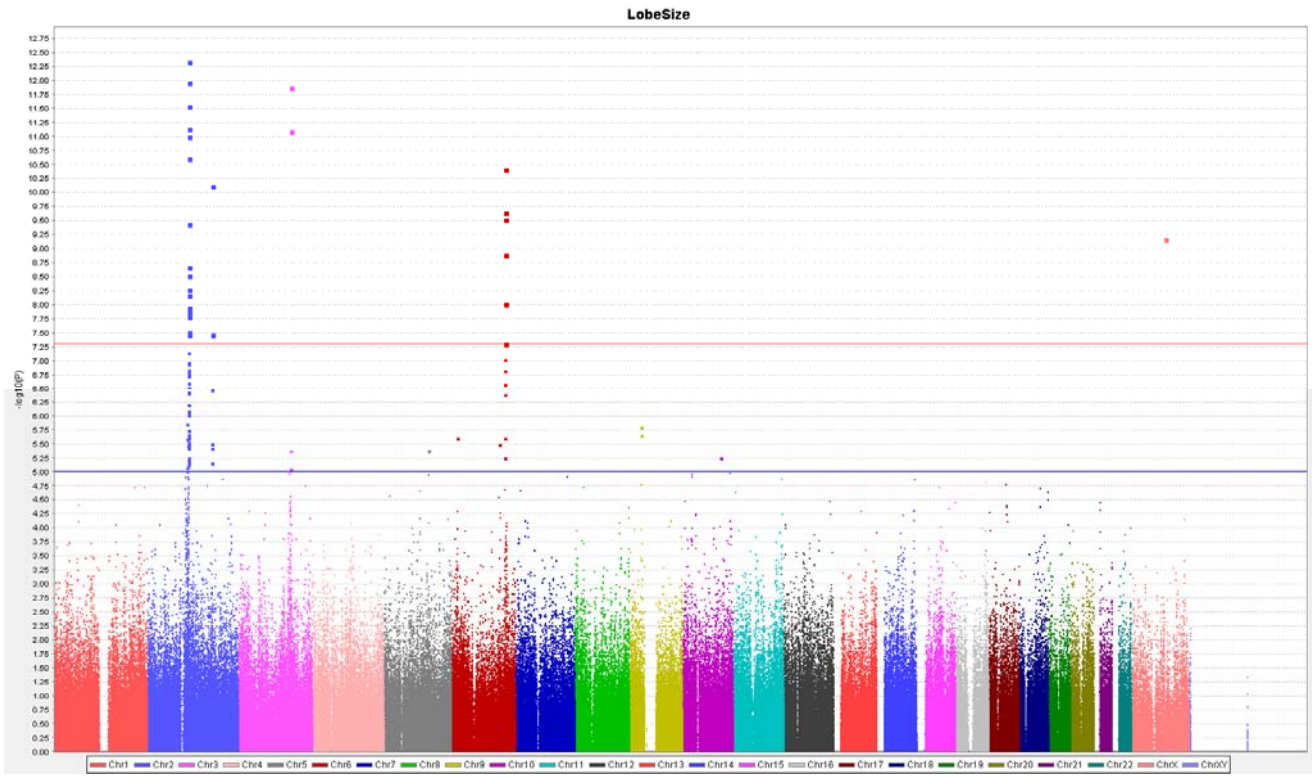

Supplementary Figure 7: Regional association plots for the seven genomic regions showing genome-wide significant association to pinna traits.

Results are shown for all traits showing genome-wide association (Table 1). Association results (on a  $-\log_{10} P$  scale; left y-axis) are shown for markers ~500kb on either side of the index SNP (i.e. the marker with smallest p-value, purple diamond; Table 1) with the marker (dot) colour indicating the level of LD ( $r^2$ ) between the index SNP and that marker in the 1000genomes AMR dataset. Local recombination rate in AMR is shown as a continuous blue line, with the scale on the right y-axis. Genes in each region, their intron-exon structure, direction of transcription and genomic coordinates (in Mb, using the NCBI human genome sequence, Build 37, as reference) are shown at the bottom. Plots were produced with LocusZoom.

### 1p12 – Antitragus Size

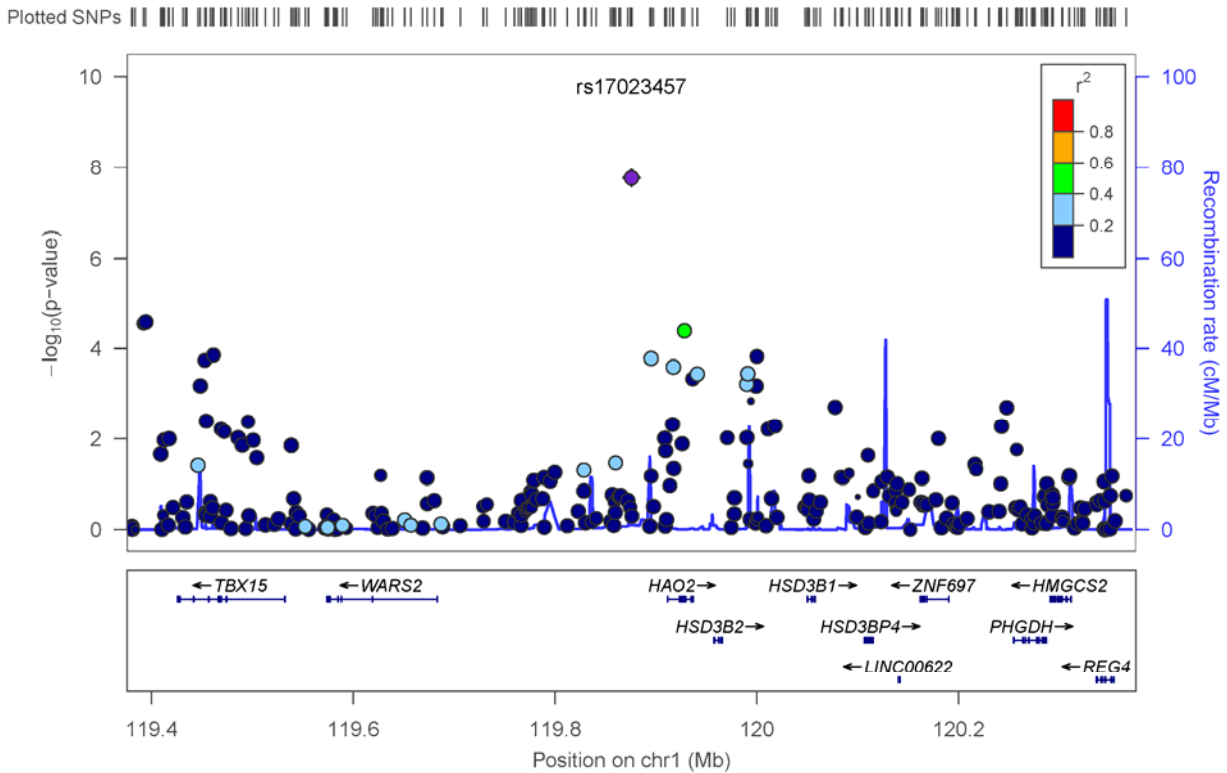

# 1p12 – Folding of Antihelix

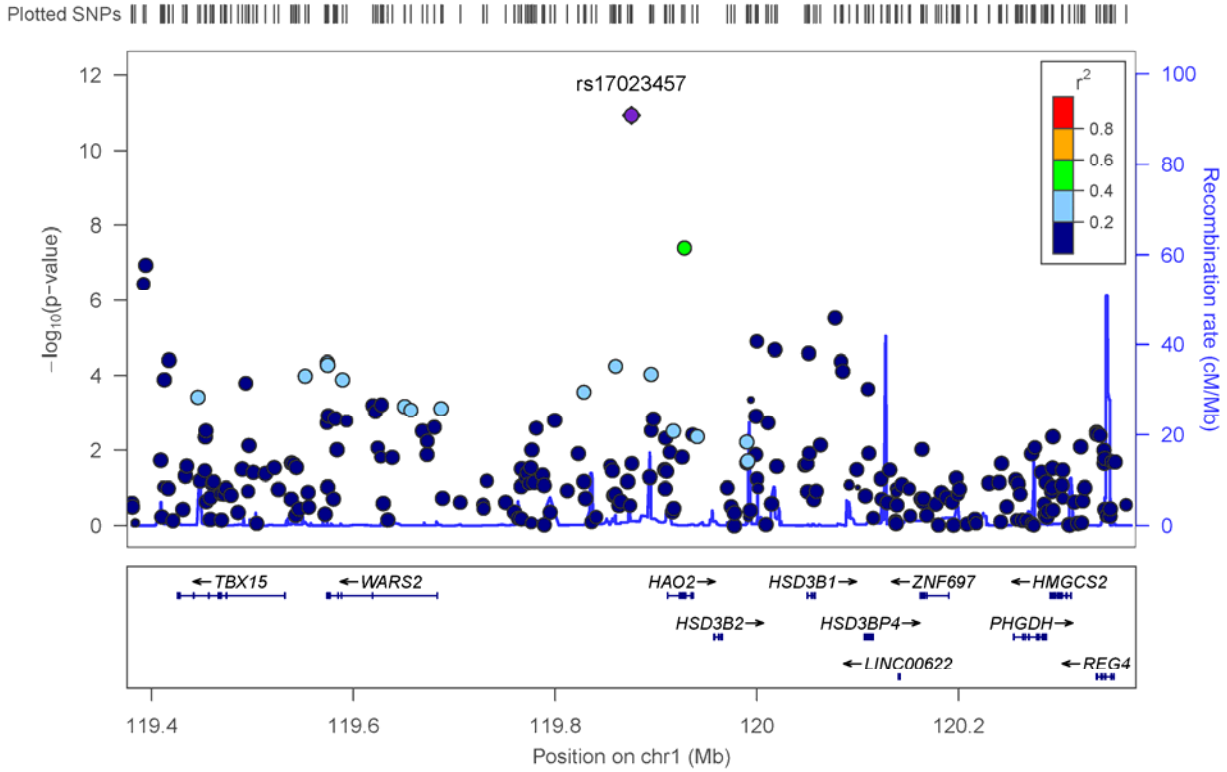

# 2q12.3 – Ear Protrusion

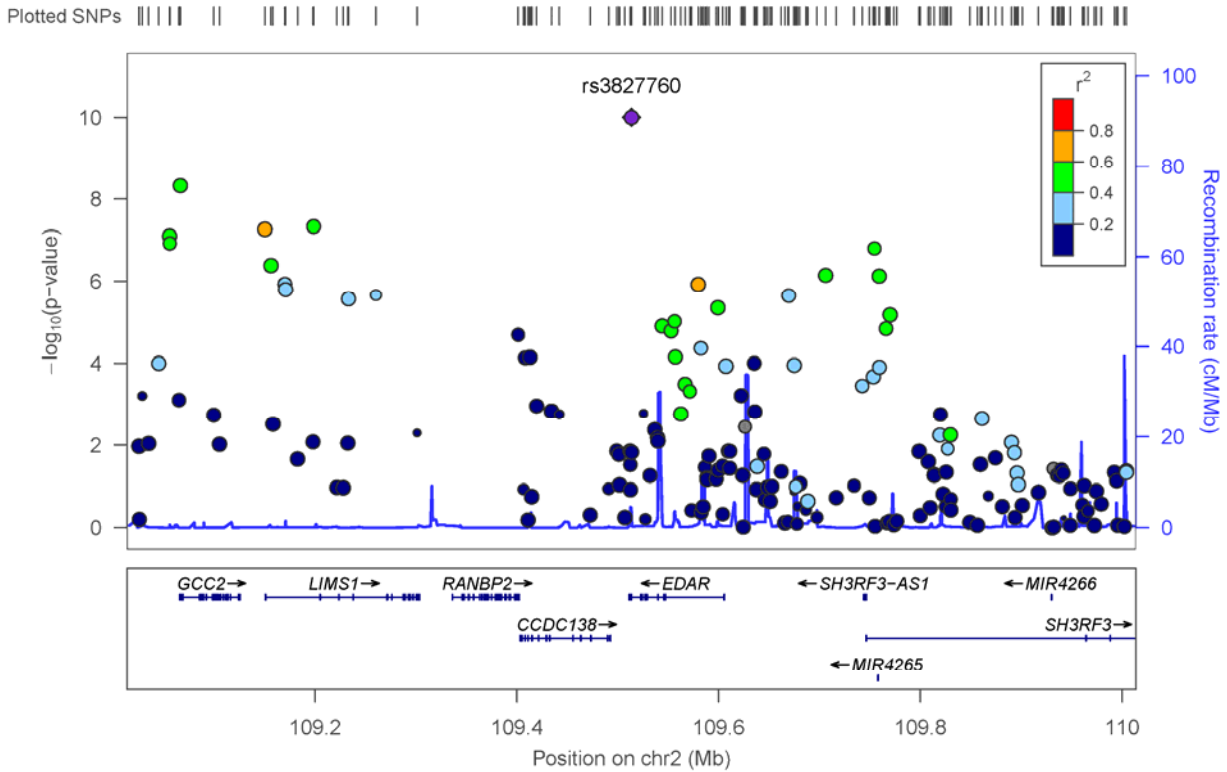

## 2q12.3 – Helix Rolling

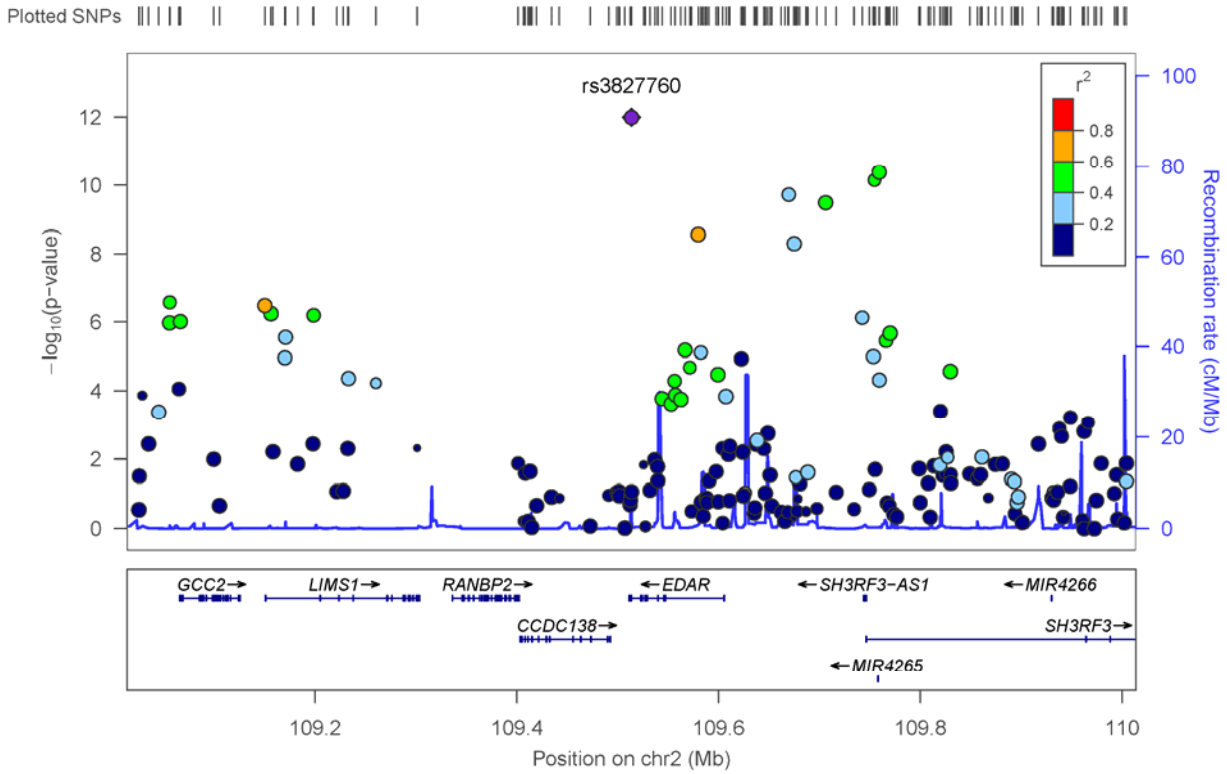

## 2q12.3 – Lobe Attachment

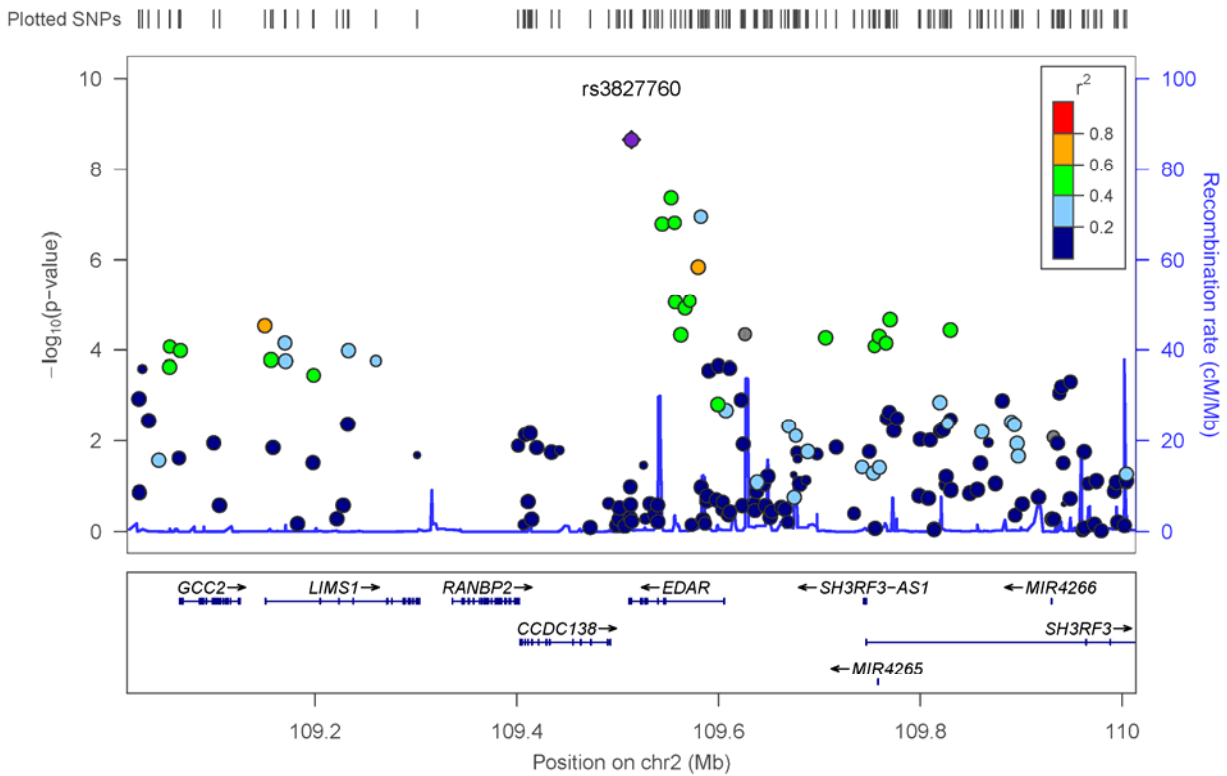

## 2q12.3 – Lobe Size

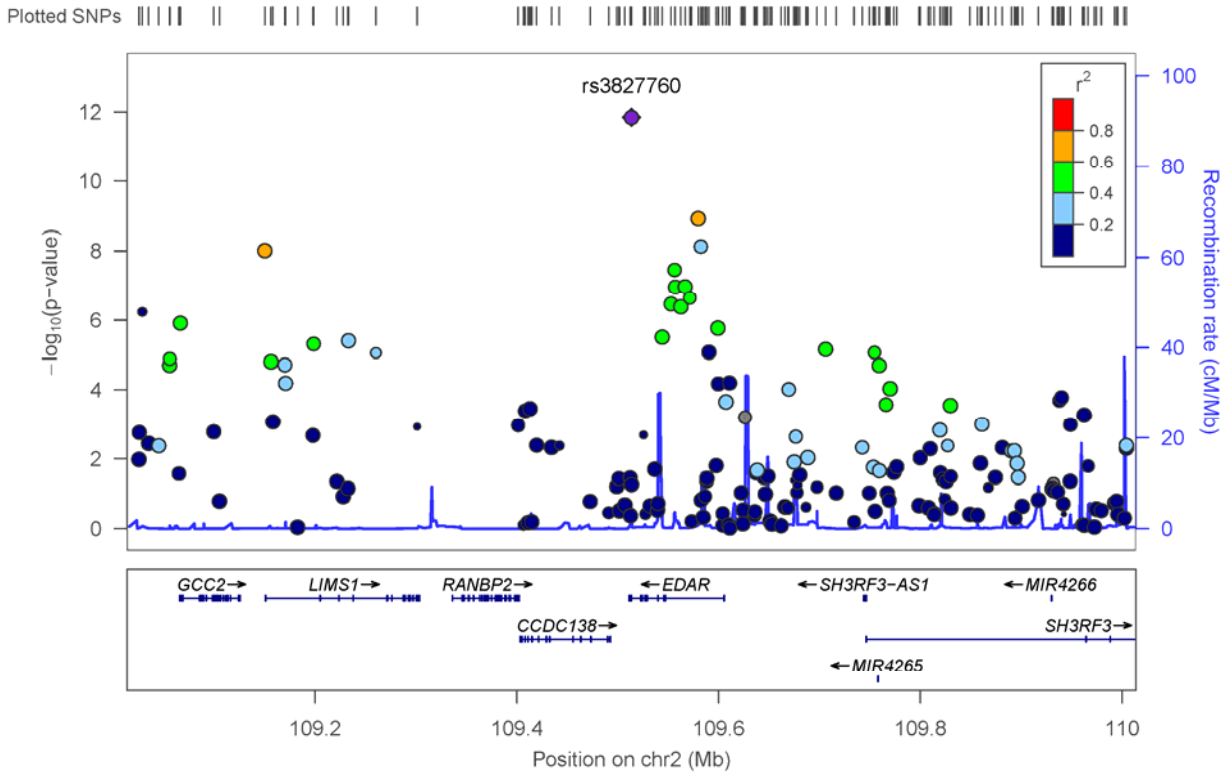

## 2q31.1 – Lobe Attachment

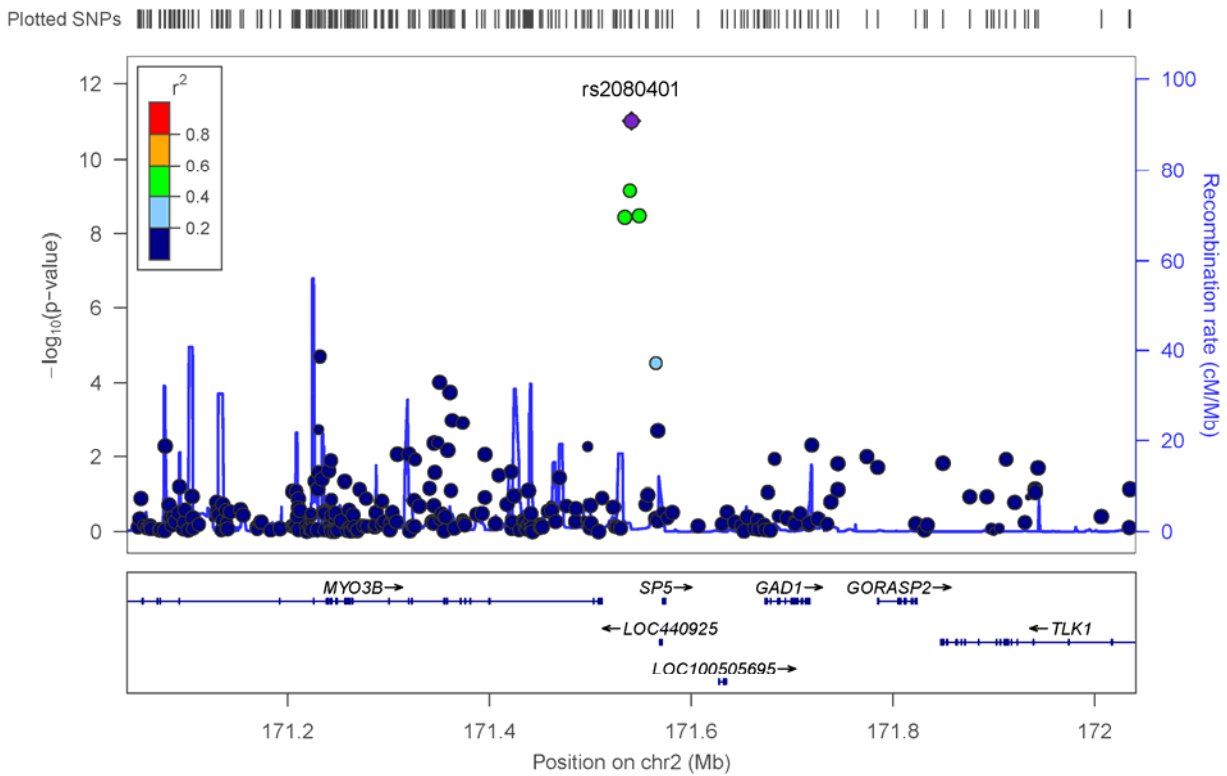



## 2q31.1 – Lobe Size

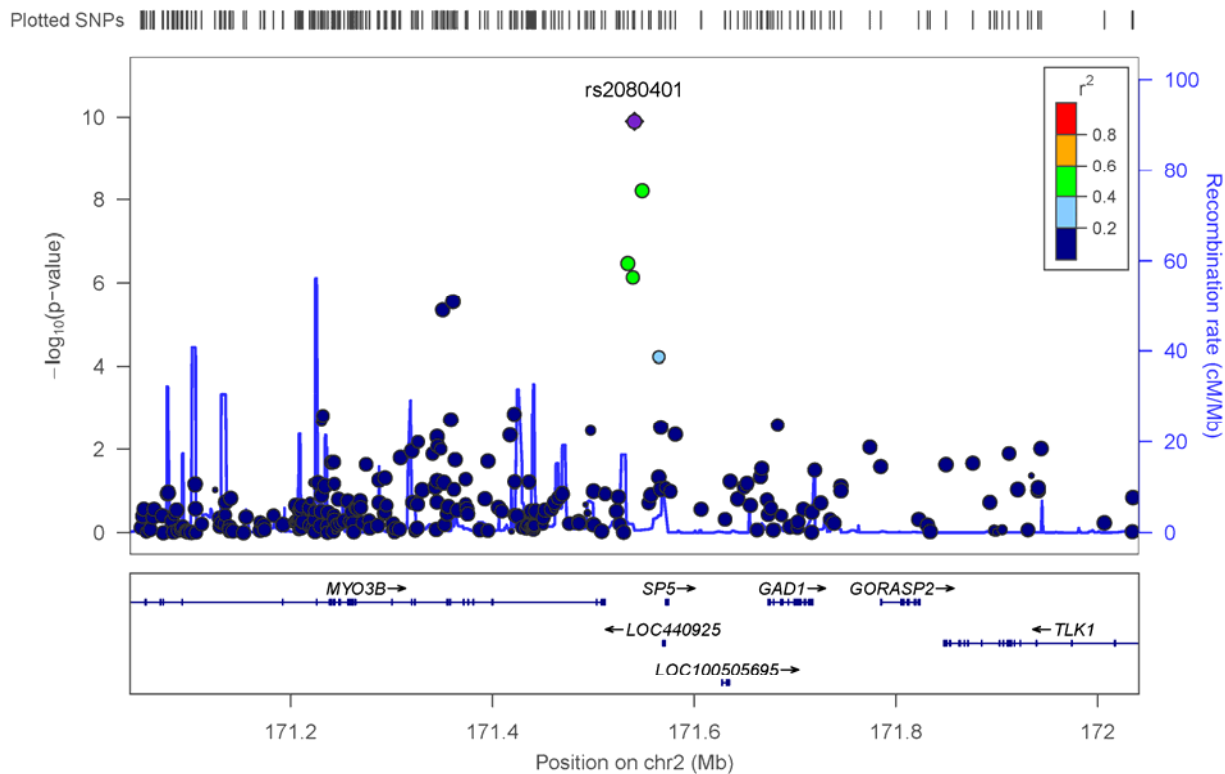

## 3q23 – Lobe Size

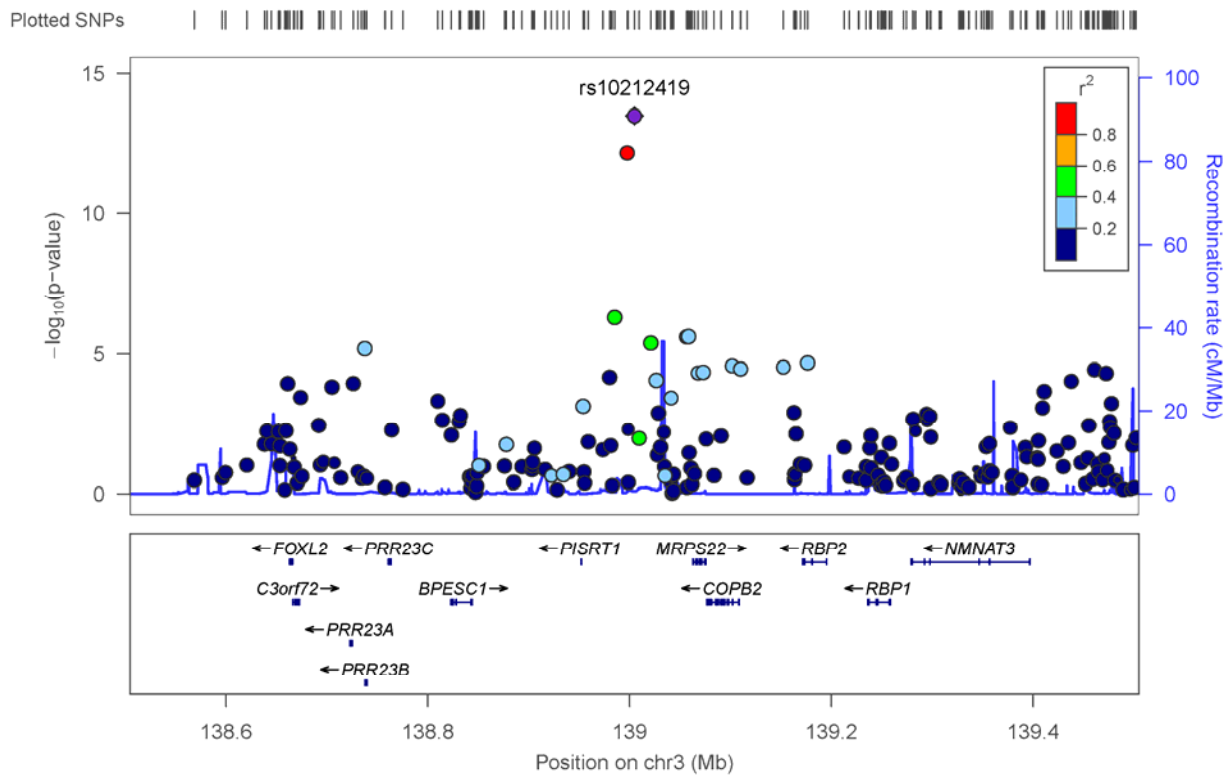

## 4q31.3 – Helix Rolling

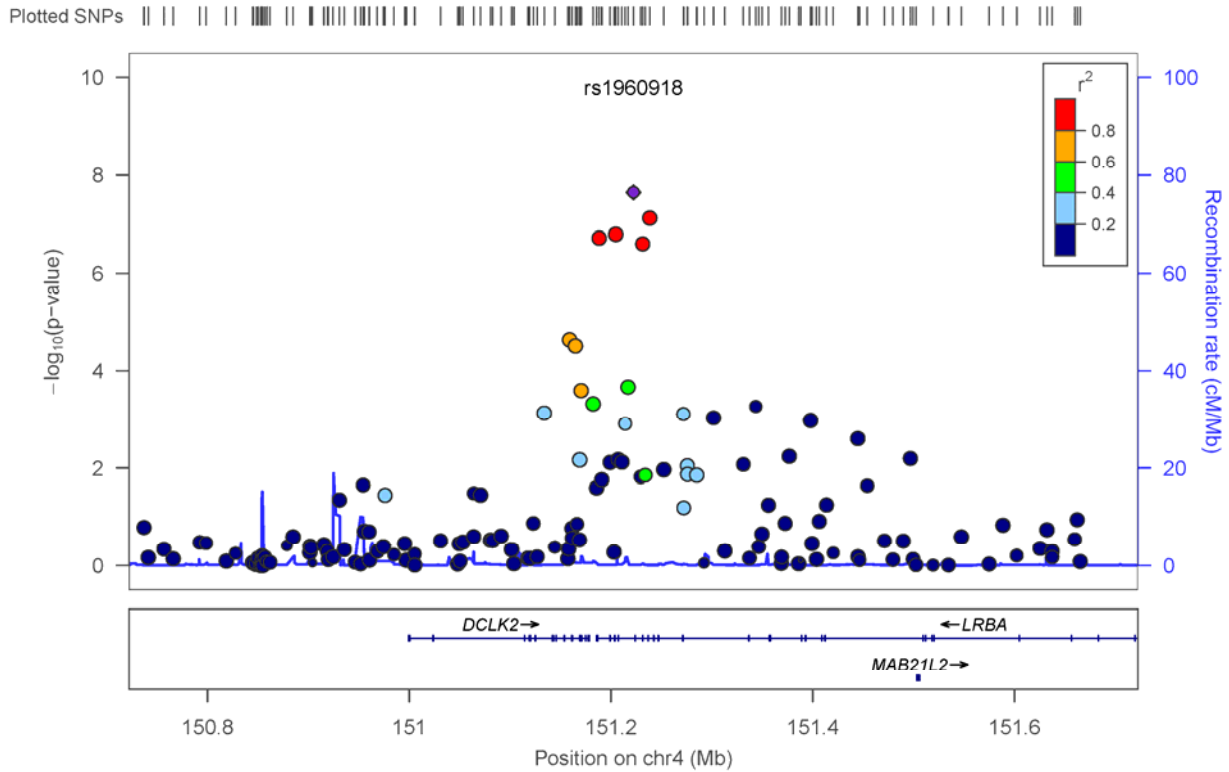

## 6q24.2 – Lobe Size

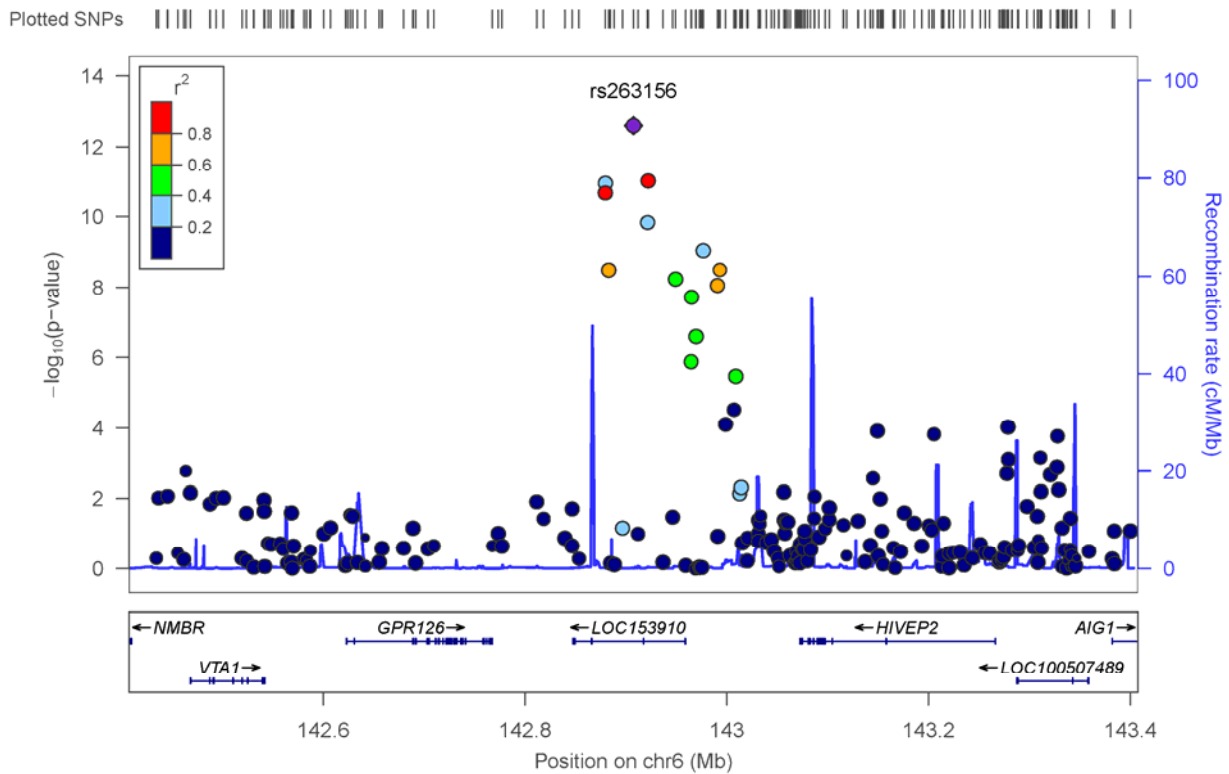

# 18q21.2 – Folding of Antihelix

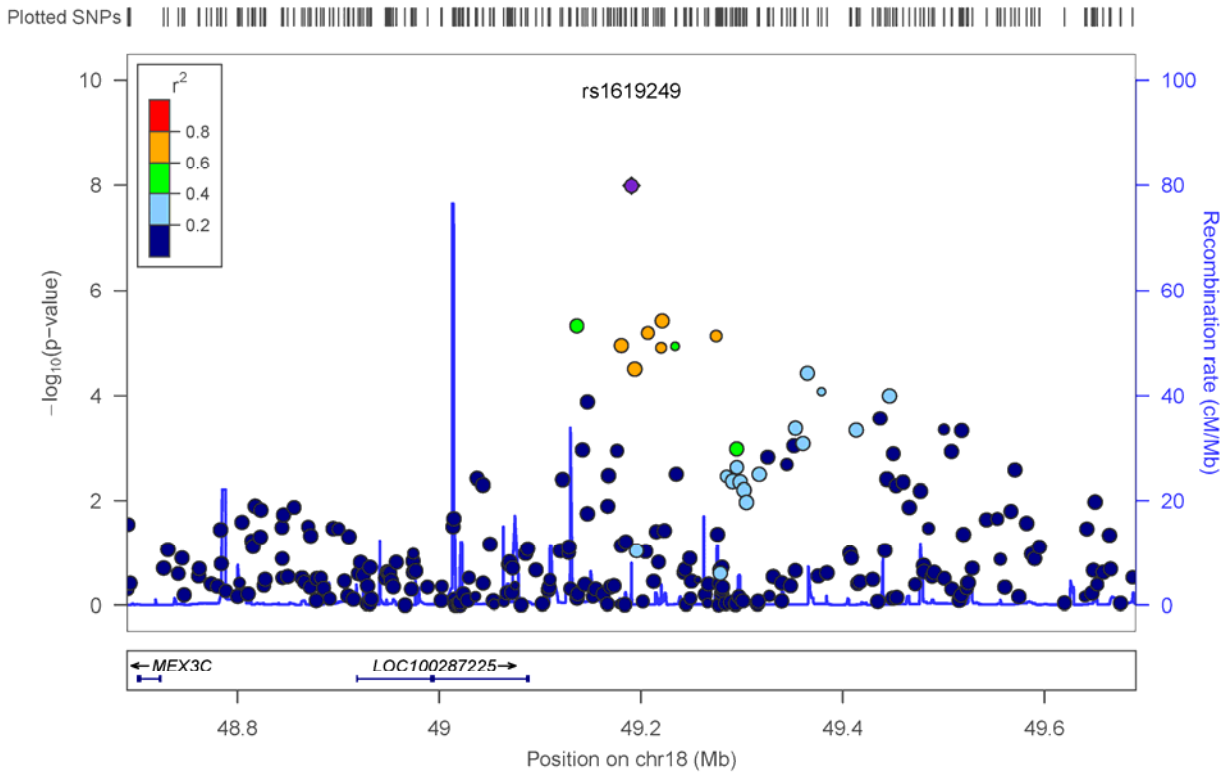

## Supplementary Figure 8: Conditioned GWAS analysis

### A) rs3827760 on Lobe Size

The two figures below compare GWAS Manhattan plots for Lobe Size (top) and Lobe Size conditioned on rs3827760 (bottom).

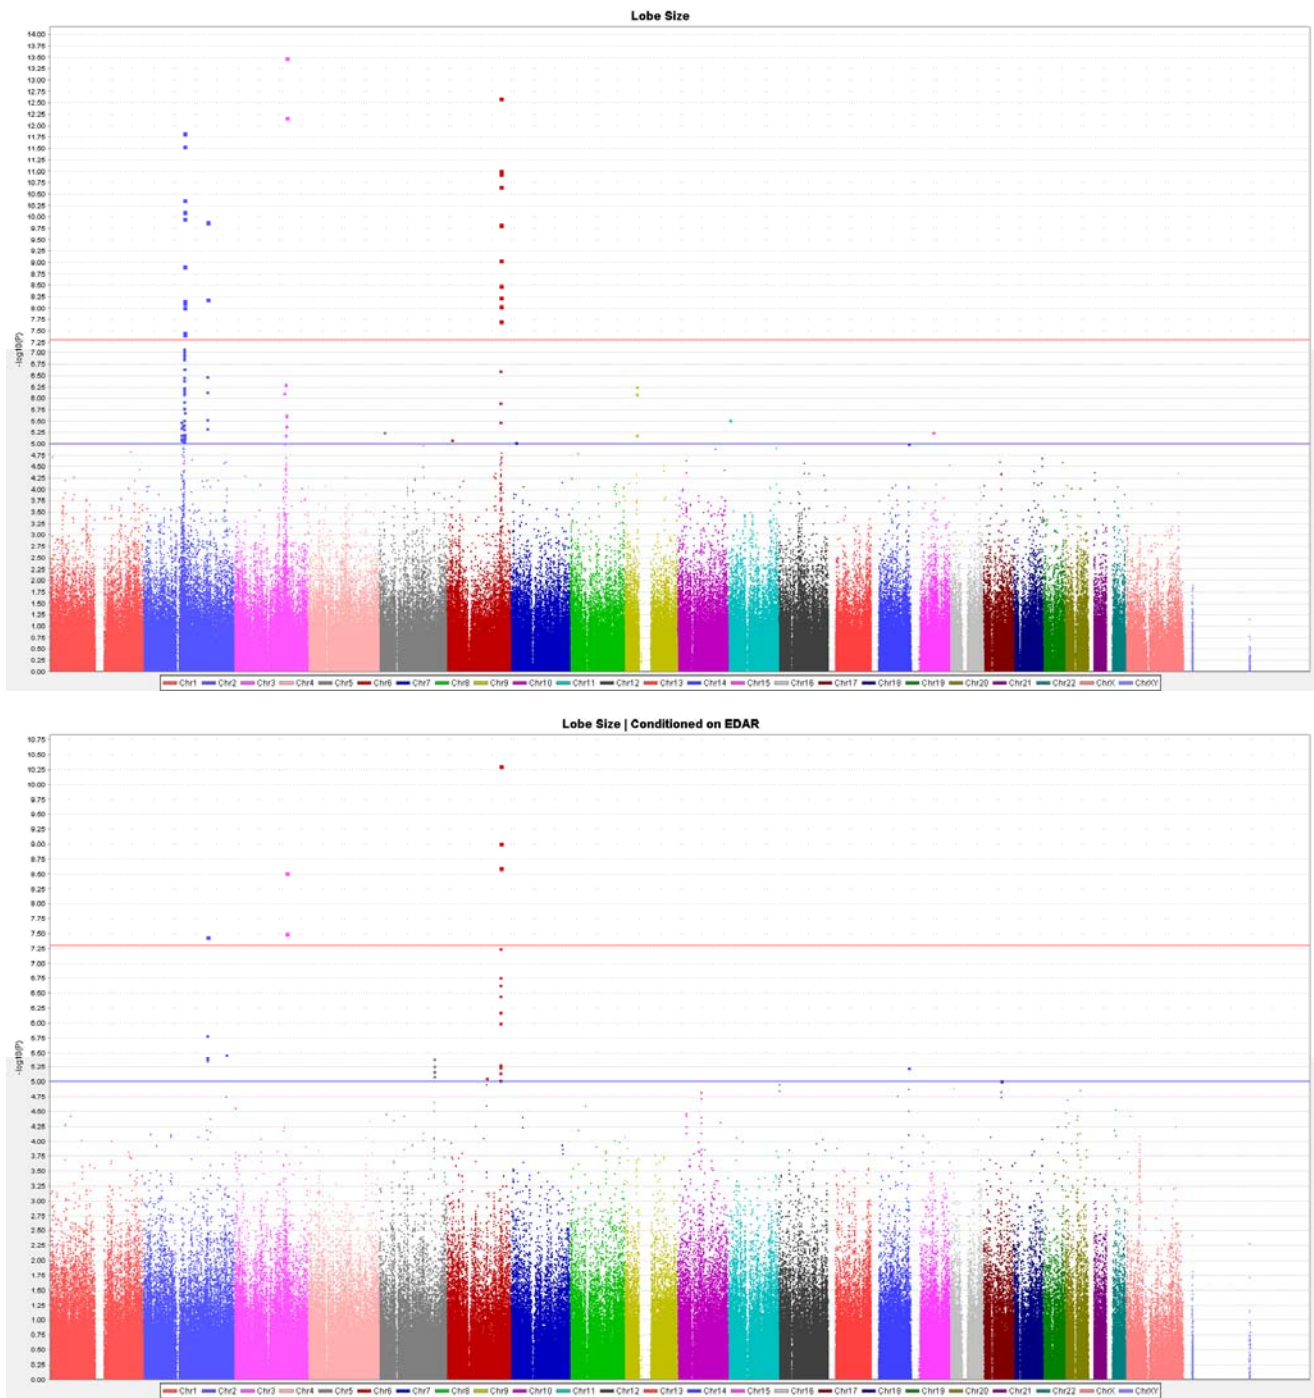

B) rs17023457 on Folding of Antihelix

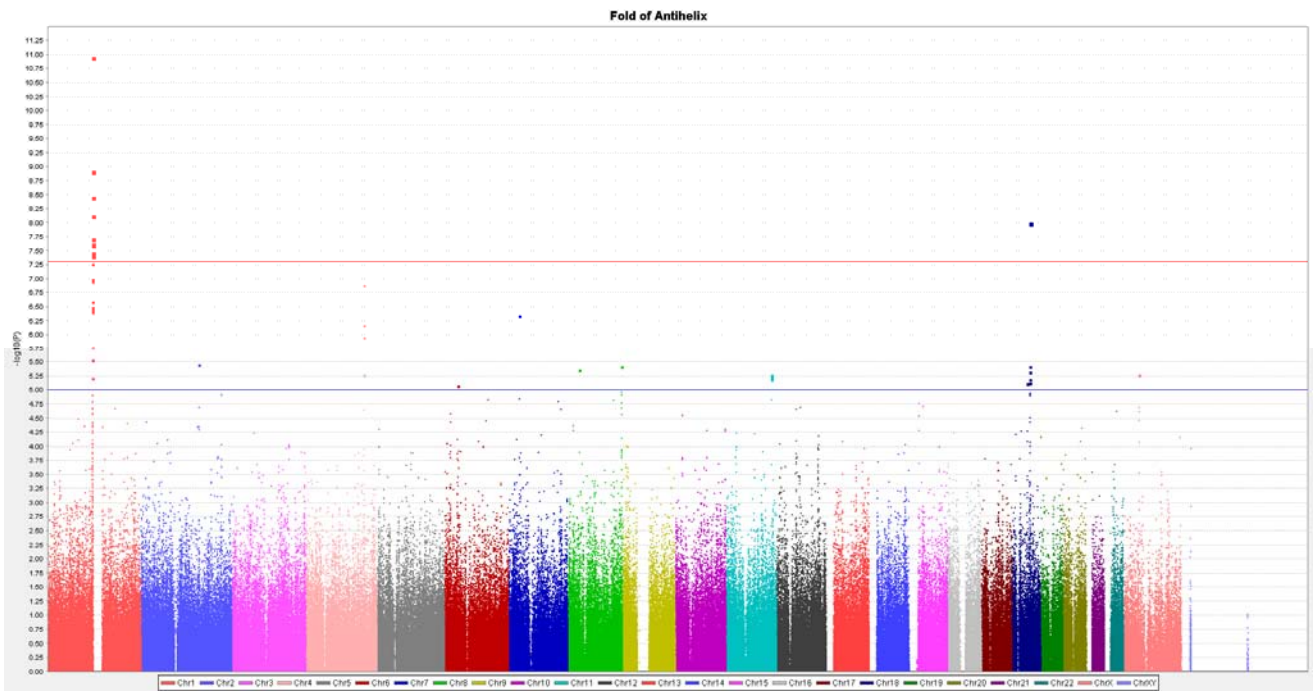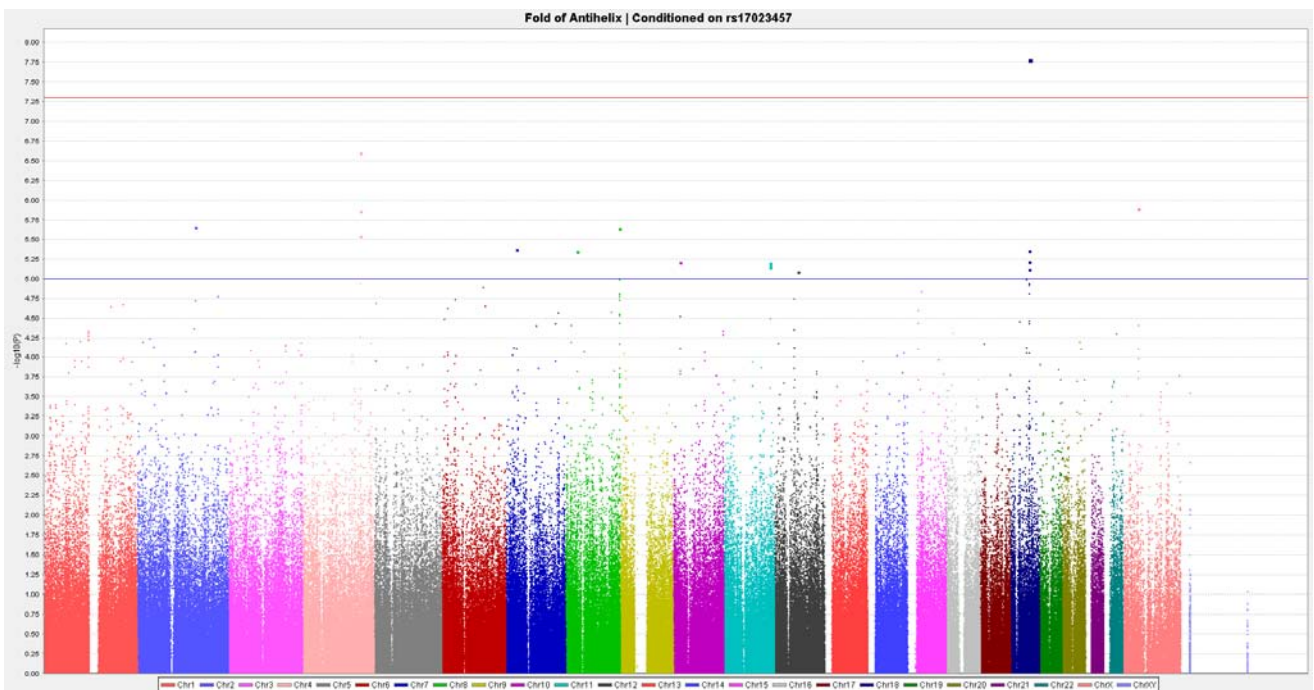



Supplementary Figure 9: Geometric-Morphometric evaluation of mouse pinnae

A) Top head view:

The placement of ten landmarks on top views of a mouse head is shown below. Eight points are on the mouse head and two on the scale for calibration of distance.

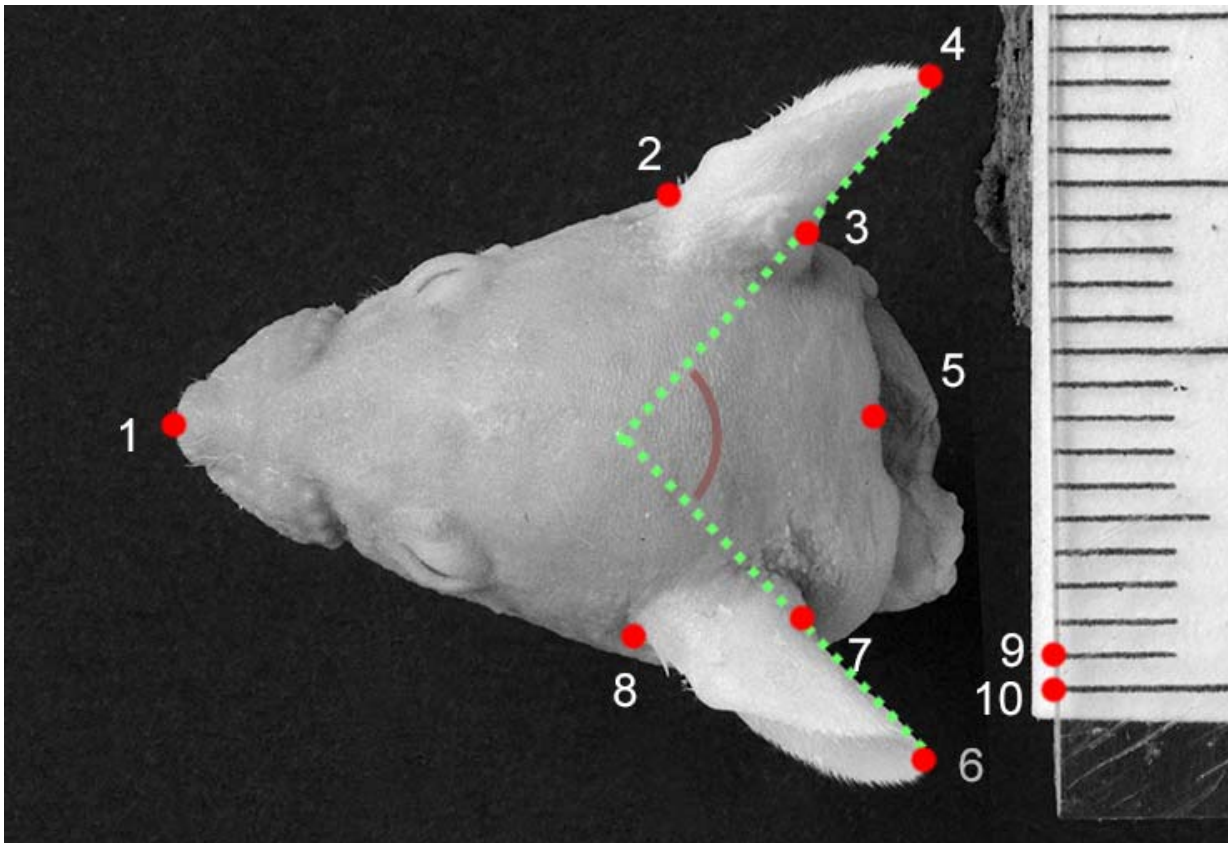

Landmark definitions:

| Landmark | Name                    | Definition                                                                             |
|----------|-------------------------|----------------------------------------------------------------------------------------|
| 1        | Nose tip                | The tip of the nose (most anterior point of the nose in the superior view).            |
| 2        | Otobasion superiorous R | The right superior point at the attachment of the pinna and the head.                  |
| 3        | Otobasion posterior     | The most posterior point where the right pinna and the head meet.                      |
| 4        | Superpinna              | The most posterior-superior point of the right pinna in the superior view of the head. |
| 5        | Opisthocranion          | The most posterior point of the head, at the sagittal plane.                           |
| 6        | Superpinna              | The most posterior-superior point of the left pinna in the superior view               |

of the head.

- |   |                         |                                                                      |
|---|-------------------------|----------------------------------------------------------------------|
| 7 | Otopasion posterior     | The most posterior point where the left pinna and the head meet.     |
| 8 | Otopasion superiorous L | The left superior point at the attachment of the pinna and the head. |

Ear protrusion is measured in two ways:

- 1) The angle between two pinna, shown as the angle between two green lines (lines joining landmarks 3-4 and 6-7), in degree units.
- 2) The tip distance, measured as the distance between landmarks 4 & 6. This was calibrated by the distance between landmarks 9 & 10 being 1 mm. It was converted as a proportion via dividing by head width.

#### B) Side head view:

The placement of 27 landmarks on 2D photographs of the left side of mice heads is illustrated below. 24 landmarks are placed on the pinna (4 to 27) whereas 3 (1-3) are placed on the head. Centroid size and principal components were calculated on this set of pinna landmarks and semi-landmarks after sliding of semi-landmarks and Generalized Procrustes Analysis.

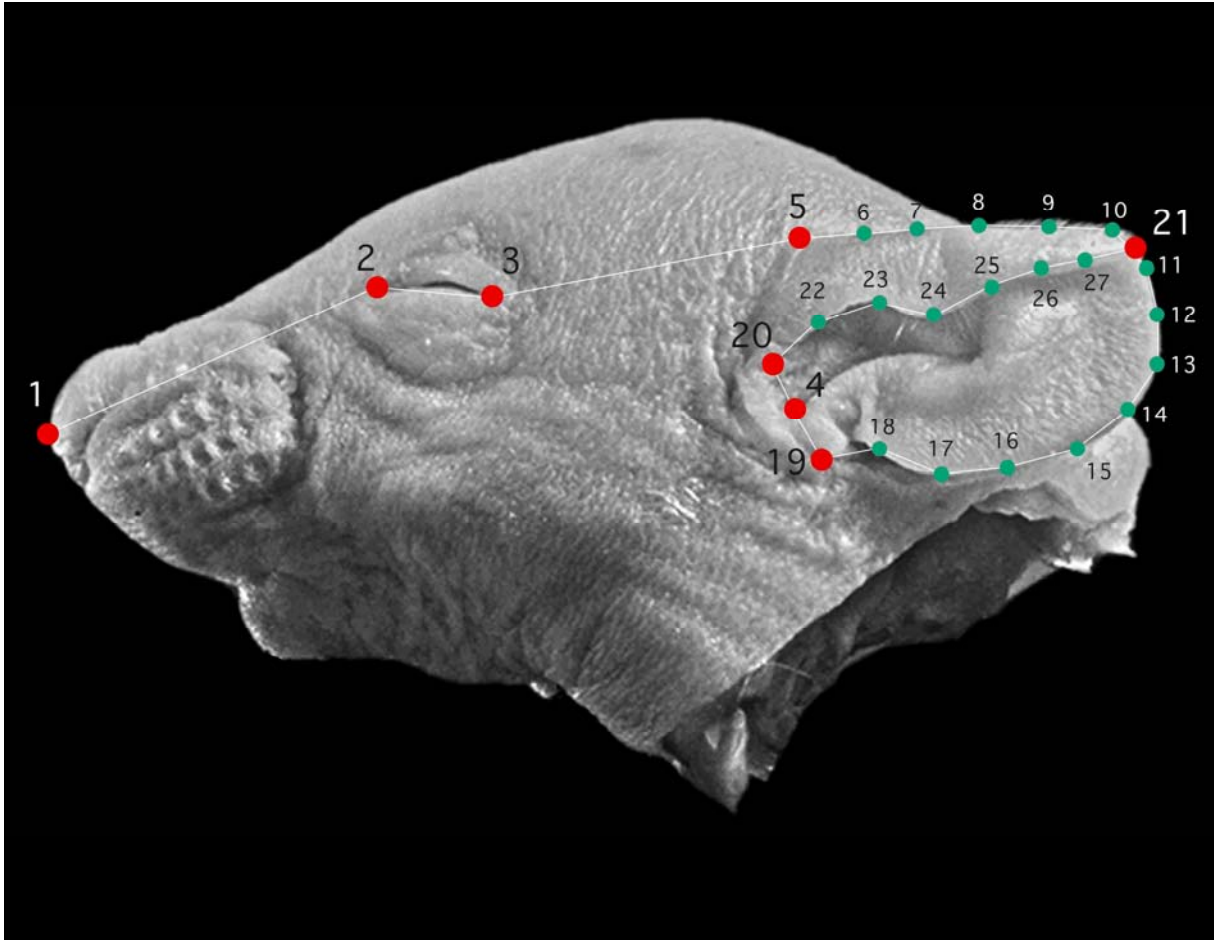

Landmark definitions:

| Landmark | Name                  | Definition                                                                            |
|----------|-----------------------|---------------------------------------------------------------------------------------|
| 1        | Nose tip              | The tip of the nose (most anterior point of the nose in the lateral view).            |
| 2        | Endocanthion          | The inner corner of the eye fissure where the eyelids meet.                           |
| 3        | Exocanthion           | The outer corner of the eye fissure where the eyelids meet.                           |
| 4        | Intertragic incisures | The deepest point in the intertragic incisures.                                       |
| 5        | Otopasion superiorous | The superior point on the union of the pinna and the head.                            |
| 6 – 10   | Semi-landmarks*       | Points along the superior border of the helix, between landmarks 5 and 21.            |
| 11- 18   | Semi-landmarks*       | Points along the inferior border of the pinna (auricle), between landmarks 21 and 19. |

|        |                       |                                                                                         |
|--------|-----------------------|-----------------------------------------------------------------------------------------|
| 19     | Otobasion inferiorous | The basal point on the union of the pinna and the head.                                 |
| 20     | Helix anterior        | The most anterior point where the internal border/line of the helix and the head meet.  |
| 21     | Helix posterior       | The most posterior point where the internal border/line of the helix and the head meet. |
| 22- 27 | Semi-landmarks*       | Points along the inferior border of the helix, between landmarks 20 and 21.             |

\*Semi-landmarks are treated as homologous landmarks after sliding them along the contour minimizing the bending energy matrix of the configuration (see Methods).

### Supplementary Figure 10: Effect of *Edar* genotype on mutant mouse pinna morphology

We compared pinna morphology between wild-type and mutant mice. The loss of function *Edar*<sup>dlJ</sup> line carries the downless Jackson allele (encoding *Edar* p. E379K). The gain of function *Edar*<sup>Tg951</sup> line carries approximately 16 copies of the *Edar* gene copies of the entire *Edar* locus on a 200 Kb yeast artificial chromosome (homozygous transgenic animals therefore carry about 34 copies of the gene in total). More details in Supplementary Note 1. The number of individuals examined for each genotype is provided in brackets.

#### A) Boxplot of ear protrusion angle vs. genotype

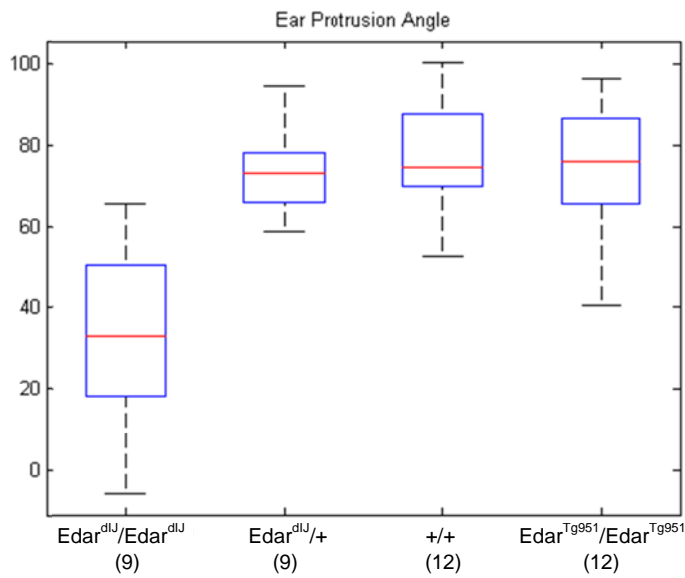

#### B) Boxplot of ear tip distance (as a proportion of head width) vs. genotype categories:

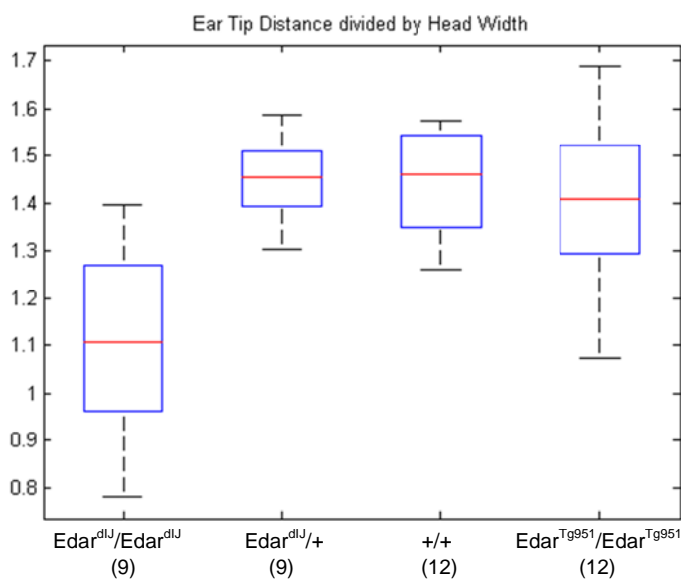

C) Boxplot of 2D pinna landmarks PC1 vs. genotype categories:

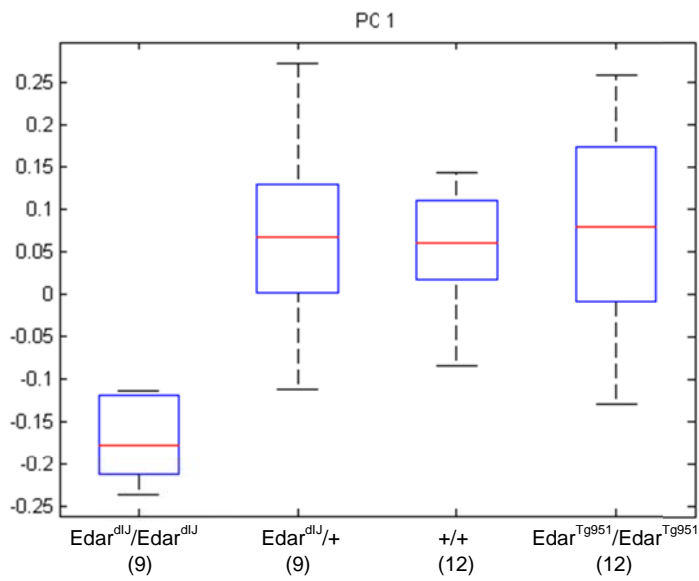

D) Interpretation of mouse pinna landmark PC1 shape change:

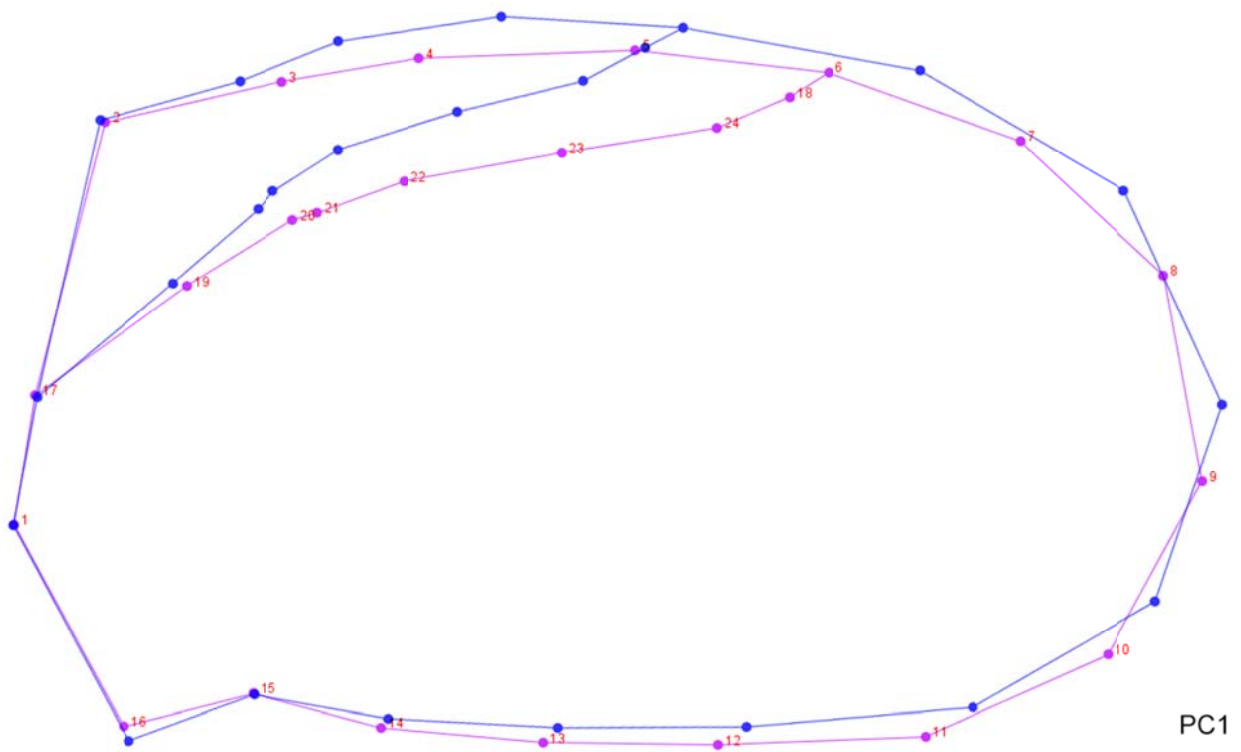



Wireframe of the average shape of mouse pinna landmark points is shown in purple, while the wireframe distorted towards PC1 by 10% is shown in blue. For simplicity, the three landmarks placed in the head are not shown, and the two wireframes are rotated to coincide at the base of the pinna (landmarks 4, 5, 19, 20 of the side view protocol) in order to visualize change in other landmarks (an analysis based only on pinna landmarks provided highly similar results). Landmarks corresponding to the border of helix (path joining landmarks 20 to 21 in protocol) show the largest deviation. While the mouse pinna does not show the rolling seen in humans, a correspondence can be envisioned by observing how further the helix is attached to the outer boundary of the pinna. PC1 is strongly associated with EDAR genotypes as seen in the previous subsection, which corresponds to the association of helix rolling to rs3827760 seen in the human pinna.

Supplementary Figure 11: *In-silico* and *in-vitro* analysis of the index SNP in the 1p12 associated region (rs17023457)

A) rs17023457 is located in an evolutionarily conserved binding site for transcription factor CART1 (Cartilage paired-class homeoprotein 1)

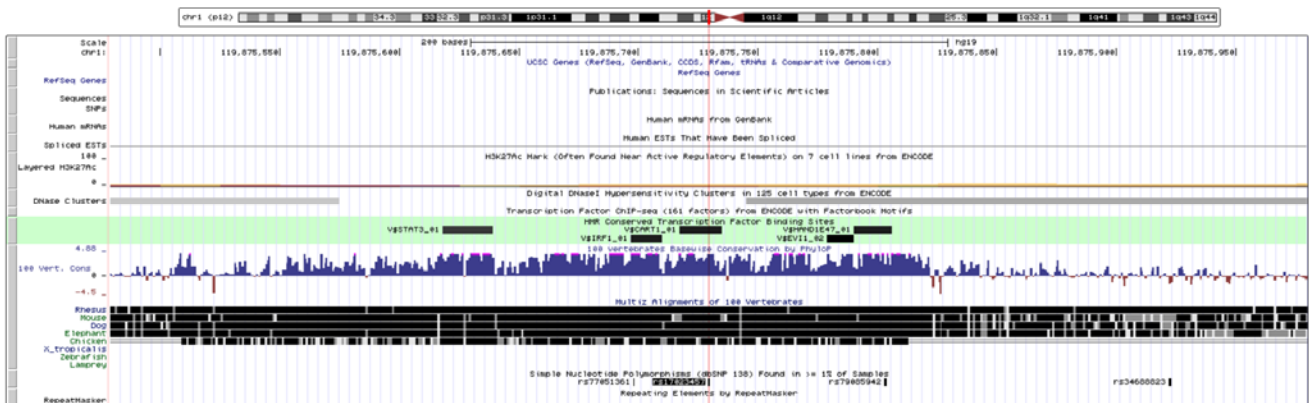

The green region highlights conserved transcription factor binding sites (TFBS). The CART1 binding site overlaps with rs17023457 (its position denoted by the vertical red line). The blue barplot panel underneath the TFBS track indicates high evolutionary conservation of this non-coding region (100 Vert. Cons track). Output from UCSC Genome Browser.

B) *In vitro* analysis of rs17023457

a) Electrophoretic mobility shift assays demonstrating differing DNA-protein interactions between probes (oligonucleotides) with the T or C alleles of rs17023457 using nuclear extracts from a CART1-expressing cell line, Huh7 (see Methods). A specific band is observed for the probe with the T allele which is eliminated when pre-incubating with a CART1 consensus competitor DNA sequence, confirming the binding of CART1. A non-specific band binds to probes with both rs17023457 alleles.

b) Luciferase reporter assay (see Methods) showing significantly increased expression in cells transfected with constructs containing the (T) allele at rs17023457, compared to constructs with the (C) allele. The genomic sequence surrounding rs17023457 (see paragraph C below) was inserted in forward (TF and CF) and reverse (TR and CR) orientations, upstream of the SV40 promoter driving luciferase expression. P-values were obtained from an analysis of variance of the luciferase readings.

c) Uncropped image of the EMSA gel as shown in a) above. The extra lane at the end is a duplicate of lane 2, i.e. CART1 competitor and CART1 consensus labelled probe.

a)

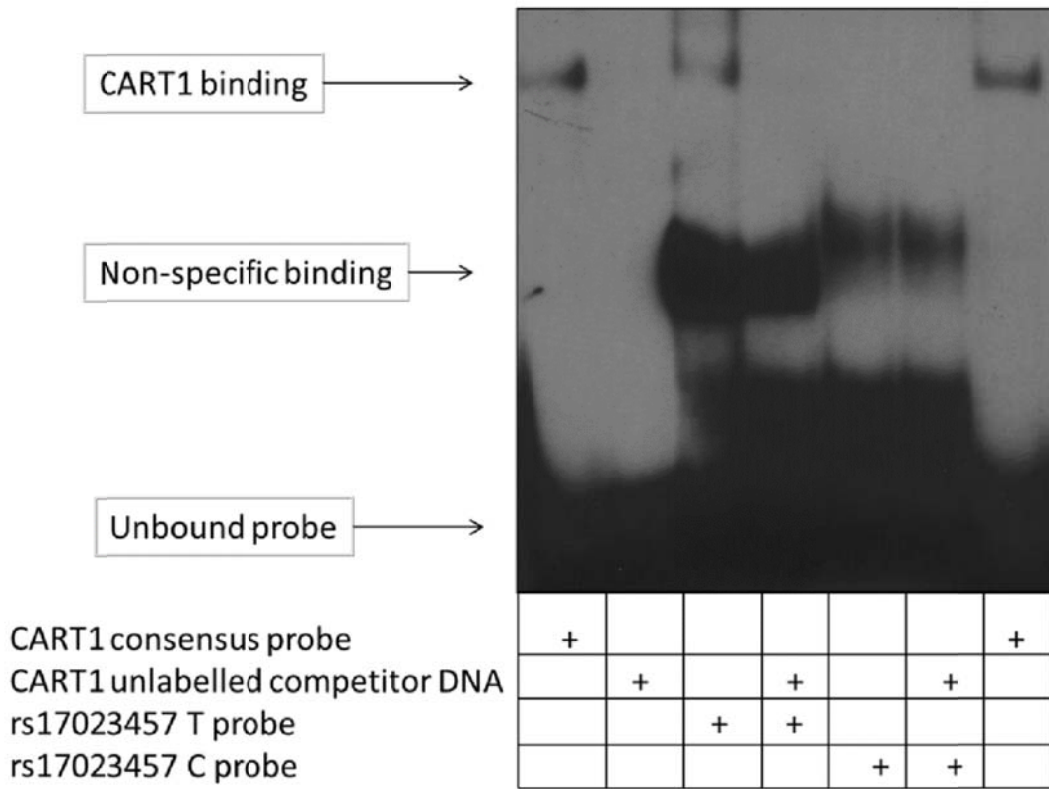

b)

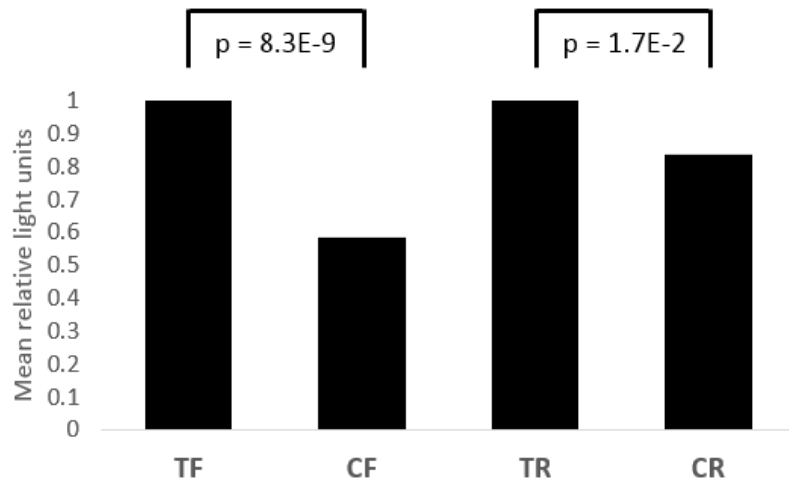

c)

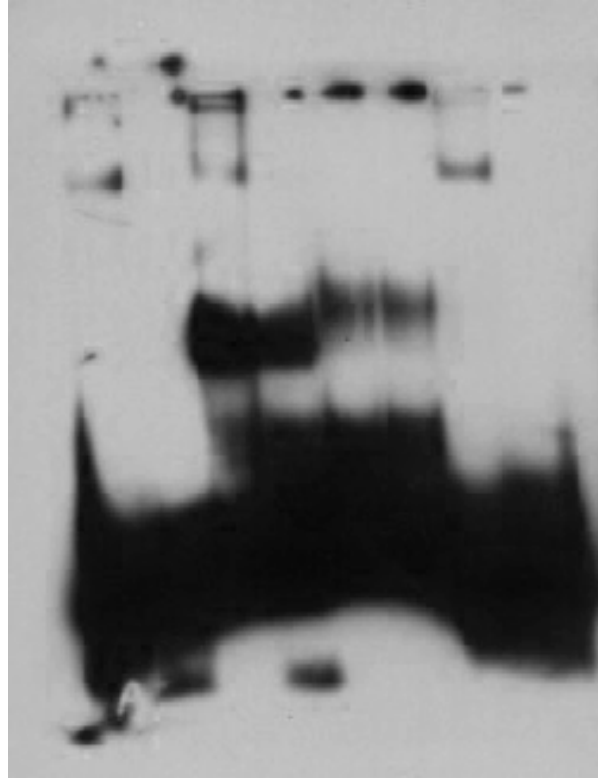

C) Sequence of genomic sequence insert (surrounding rs17023457) used in the luciferase reporter assay

Position of rs17023457 is highlighted in green:

```
GGTACCATCTACGGGTCTGGAGGAGGTTTGGGACGTTTCCTTTTCTTCTCTTCAGGGGCCACTCCTGTTGTAAAG
AGCAGCAGCATTTATAATGAGGGCCCAGGAAATGCGGGGGAGAGGGGAGAGCCTGCTATCTCTGCAGTGGGTGACT
GTTGTTTCCCTGATCAACAATGTATCATATCCCAGCCTAAGCCTGCCTTTCTCCTTCCCCCTCCACATGGGGAGGG
GCCGTGGGCTCAGAGCTCACCTGGAATGCCTCTGGTTGCTGAAGGGCTGGATGGAGACTCTGAGACAACCTGATGG
ATCATCTCATAAACAGAGCCTGCAGGAAGGAAAAGAAAATTATGCCAGCATAATGCACTTACGAGAAATAGATACG
TGCGGTGCAGGGAGAAATGCTTTGATATTAATAATTTTTGTAACCTTAAAAAGGCATGAAAAATGATACCGACCACTA
ACTAATCAACA [T/C] TCCTTTGCGAATACAGCTTCAGTTCCTAACCAAAAACACATCCCTGCTATTGTCTTGTCT
GGATCCAGATGCAAACATGATTAATTAAGTTTCTGGTGAGGAGTGGGACGAGGGCAGTGGGAACCTGATGGCTTGCT
GAGGATCCTTTTCATATACAGGCCTGGGGAGAATCCCTTAGTCTGGGTGCCTATTTCCCTCCACATGTCAGGGCTT
ACCCCGTGCACCTGACAGCCACGGGGGCAGTGAGTAGGCTGCAGCCAGACCCATGGAGTGAGGCAGTGAGAGGCTGA
AAGGAGAGGCTCTACAGACAGTACAGGGAGGCTCTTGGTATCTCCCATTGCCACTGCACAGCACAGCACGGCAGAG
TAGCAAACGCATATGCCATGTCTTGTGGGAGACCTGGGCCCTGCTCCAGACTGCTACCAAGTAGTTTGGGACCTT
GGATGAGCTCTCGAG
```

## SUPPLEMENTARY TABLES

Supplementary Table 1: Features of the study sample

|                            | <b>Total</b> | <b>Colombia</b> | <b>Brazil</b> | <b>Chile</b> | <b>Mexico</b> | <b>Peru</b> |
|----------------------------|--------------|-----------------|---------------|--------------|---------------|-------------|
| <b>Sample size</b>         | 5062         | 1293            | 697           | 1376         | 1211          | 485         |
| <b>Percentage</b>          | 100          | 25.5            | 13.8          | 27.2         | 23.9          | 9.6         |
| <b>% Female</b>            | 52.7         | 56.6            | 68.3          | 32.4         | 60.4          | 63.1        |
| <b>Age (years)</b>         |              |                 |               |              |               |             |
| Min                        | 18           | 18              | 18            | 18           | 18            | 18          |
| Mean                       | 24.4         | 24.1            | 25.4          | 24.8         | 24.4          | 22.2        |
| Max                        | 43           | 40              | 43            | 43           | 40            | 40          |
| S.D.                       | 5.5          | 5.4             | 6.0           | 5.4          | 5.5           | 5.0         |
| <b>Age, for Males</b>      |              |                 |               |              |               |             |
| Min                        | 18           | 18              | 18            | 18           | 18            | 18          |
| Mean                       | 24.9         | 24.9            | 25.6          | 24.9         | 25.0          | 22.5        |
| Max                        | 43           | 40              | 42            | 43           | 40            | 37          |
| S.D.                       | 5.5          | 5.7             | 5.9           | 5.1          | 5.5           | 5.0         |
| <b>Age, for Females</b>    |              |                 |               |              |               |             |
| Min                        | 18           | 18              | 18            | 18           | 18            | 18          |
| Mean                       | 24.0         | 23.6            | 25.3          | 24.5         | 24.0          | 21.9        |
| Max                        | 43           | 40              | 43            | 40           | 40            | 40          |
| S.D.                       | 5.6          | 5.1             | 6.1           | 5.9          | 5.5           | 5.0         |
| <b>Native Ancestry (%)</b> |              |                 |               |              |               |             |
| Min                        | 0.001        | 1.374           | 0.001         | 0.821        | 0.001         | 0.240       |
| Mean                       | 42.266       | 28.999          | 9.151         | 48.628       | 58.749        | 67.281      |
| Max                        | 99.998       | 93.840          | 90.915        | 99.998       | 99.998        | 99.998      |
| S.D.                       | 23.307       | 9.686           | 10.744        | 15.464       | 19.376        | 18.362      |

| <b>European Ancestry (%)</b> |        |        |        |        |        |        |
|------------------------------|--------|--------|--------|--------|--------|--------|
| Min                          | 0.001  | 4.161  | 8.334  | 0.001  | 0.001  | 0.001  |
| Mean                         | 52.951 | 62.392 | 84.210 | 49.285 | 38.053 | 29.465 |
| Max                          | 99.998 | 98.039 | 99.998 | 98.792 | 99.998 | 98.464 |
| S.D.                         | 22.242 | 11.990 | 15.000 | 15.195 | 18.737 | 17.209 |
| <b>African Ancestry (%)</b>  |        |        |        |        |        |        |
| Min                          | 0.001  | 0.001  | 0.001  | 0.001  | 0.001  | 0.001  |
| Mean                         | 4.783  | 8.609  | 6.639  | 2.088  | 3.198  | 3.254  |
| Max                          | 86.452 | 86.452 | 51.347 | 22.371 | 21.857 | 48.669 |
| S.D.                         | 5.835  | 7.418  | 7.955  | 2.057  | 2.328  | 4.284  |



Supplementary Table 2: Correlation of the pinna traits examined and covariates

A) Correlation between the pinna traits examined:

Correlation values are presented in the lower left triangle while corresponding permutation p-values are presented in the upper right triangle. Correlations with significant p-values (<0.001, Bonferroni-adjusted threshold) and their corresponding p-values are indicated in bold. Sample size is 5062.

| Trait                            | EP            | LA             | LS              | HR             | FoA            | CHE          | SCoAE          | DT             | TS           | AS             |
|----------------------------------|---------------|----------------|-----------------|----------------|----------------|--------------|----------------|----------------|--------------|----------------|
| Ear Protrusion                   |               | <b>7.6E-07</b> | 4.5E-01         | <b>9.6E-27</b> | 2.1E-02        | 1.1E-01      | <b>7.1E-09</b> | <b>3.2E-06</b> | 6.2E-01      | <b>1.8E-06</b> |
| Lobe Attachment                  | <b>-0.074</b> |                | <b>1.9E-286</b> | <b>6.1E-09</b> | <b>5.8E-04</b> | 9.5E-01      | 6.3E-01        | 9.3E-01        | 2.9E-01      | 6.1E-02        |
| Lobe Size                        | 0.011         | <b>-0.486</b>  |                 | <b>6.5E-14</b> | <b>1.9E-06</b> | 1.0E-02      | 1.1E-02        | 8.7E-02        | 9.9E-02      | 7.5E-01        |
| Helix Rolling                    | <b>0.159</b>  | <b>-0.083</b>  | <b>0.108</b>    |                | <b>8.9E-69</b> | 2.7E-03      | 9.2E-01        | <b>9.8E-14</b> | 4.3E-02      | <b>1.8E-08</b> |
| Folding of Antihelix             | 0.035         | <b>-0.049</b>  | <b>0.068</b>    | <b>0.248</b>   |                | 2.2E-03      | <b>2.8E-57</b> | 4.1E-02        | 7.0E-01      | 3.2E-03        |
| Crus Helix Expression            | -0.024        | -0.001         | 0.037           | 0.043          | 0.044          |              | <b>6.9E-08</b> | 9.1E-01        | 5.5E-02      | <b>1.0E-08</b> |
| Superior Crus of Antihelix Expr. | <b>-0.087</b> | 0.007          | 0.037           | -0.002         | <b>0.228</b>   | <b>0.078</b> |                | 4.8E-01        | 1.5E-01      | <b>1.5E-08</b> |
| Darwin's Tubercle                | <b>0.070</b>  | -0.001         | -0.025          | <b>0.108</b>   | 0.030          | 0.002        | -0.010         |                | 4.3E-01      | 8.7E-01        |
| Tragus Size                      | 0.007         | -0.015         | 0.024           | -0.029         | 0.006          | 0.028        | 0.021          | 0.011          |              | <b>4.1E-15</b> |
| Antitragus Size                  | <b>-0.071</b> | 0.027          | -0.005          | <b>-0.081</b>  | 0.042          | <b>0.082</b> | <b>0.082</b>   | 0.002          | <b>0.112</b> |                |

Trait abbreviations:

- EP Ear Protrusion
- AS Antitragus Size
- FoA Folding of Antihelix
- HR Helix Rolling
- LA Lobe Attachment
- LS Lobe Size
- TS Tragus Size
- CHE Crus Helix Expression
- DT Darwin's Tubercle
- SCoAE Superior Crus of Antihelix Expression

### B) Sex-stratified correlation values:

Trait correlation values stratified by sex are presented in the table below, with values for males (sample size 2394) presented in lower left triangle and values for females presented in upper right triangle (sample size 2668). Significant correlations are highlighted in bold.

| Trait                            | EP            | LA            | LS            | HR            | FoA          | CHE          | SCoAE         | DT           | TS           | AS            |
|----------------------------------|---------------|---------------|---------------|---------------|--------------|--------------|---------------|--------------|--------------|---------------|
| Ear Protrusion                   |               | <b>-0.093</b> | -0.001        | <b>0.152</b>  | 0.005        | -0.016       | <b>-0.101</b> | <b>0.141</b> | 0.038        | -0.063        |
| Lobe Attachment                  | <b>-0.082</b> |               | <b>-0.461</b> | <b>-0.110</b> | -0.043       | -0.007       | -0.017        | -0.006       | -0.012       | 0.039         |
| Lobe Size                        | 0.051         | <b>-0.510</b> |               | <b>0.139</b>  | <b>0.045</b> | 0.055        | 0.025         | -0.043       | 0.004        | -0.014        |
| Helix Rolling                    | <b>0.122</b>  | -0.067        | <b>0.092</b>  |               | <b>0.261</b> | 0.016        | 0.017         | <b>0.085</b> | -0.018       | <b>-0.087</b> |
| Folding of Antihelix             | 0.027         | -0.062        | <b>0.103</b>  | <b>0.220</b>  |              | 0.042        | <b>0.213</b>  | 0.045        | 0.009        | 0.041         |
| Crus Helix Expression            | -0.011        | 0.008         | 0.015         | <b>0.080</b>  | 0.052        |              | 0.064         | 0.009        | 0.005        | 0.061         |
| Superior Crus of Antihelix Expr. | <b>-0.034</b> | 0.039         | 0.039         | 0.001         | <b>0.263</b> | <b>0.087</b> |               | -0.024       | 0.000        | <b>0.075</b>  |
| Darwin's Tubercle                | <b>0.040</b>  | 0.011         | -0.014        | <b>0.156</b>  | 0.024        | -0.012       | -0.008        |              | 0.005        | 0.002         |
| Tragus Size                      | 0.027         | -0.012        | 0.037         | -0.018        | 0.018        | 0.047        | 0.029         | 0.004        |              | <b>0.110</b>  |
| Antitragus Size                  | <b>-0.080</b> | 0.015         | 0.005         | <b>-0.073</b> | 0.046        | <b>0.104</b> | <b>0.088</b>  | 0.002        | <b>0.115</b> |               |

### C) Correlation between pinna traits and covariates:

| Covariate     | EP            | LA            | LS            | HR            | FoA           | CHE           | SCoAE         | DT           | TS            | AS            |
|---------------|---------------|---------------|---------------|---------------|---------------|---------------|---------------|--------------|---------------|---------------|
| Sex           | <b>-0.250</b> | -0.036        | <b>0.055</b>  | <b>-0.122</b> | <b>-0.079</b> | 0.036         | <b>0.089</b>  | <b>0.072</b> | <b>0.091</b>  | 0.008         |
| Age           | 0.012         | -0.003        | 0.003         | <b>-0.079</b> | 0.005         | <b>-0.113</b> | 0.025         | -0.035       | 0.017         | <b>-0.062</b> |
| Height        | <b>0.213</b>  | 0.044         | <b>-0.089</b> | <b>0.089</b>  | <b>0.066</b>  | -0.043        | <b>-0.076</b> | -0.028       | <b>-0.078</b> | -0.027        |
| BMI           | <b>-0.105</b> | 0.048         | <b>0.067</b>  | <b>-0.052</b> | -0.011        | <b>-0.074</b> | -0.046        | -0.044       | -0.021        | 0.000         |
| African anc.  | <b>-0.084</b> | <b>-0.075</b> | 0.043         | <b>0.126</b>  | <b>0.058</b>  | <b>0.060</b>  | 0.029         | -0.047       | -0.002        | -0.032        |
| European anc. | 0.016         | <b>-0.043</b> | <b>-0.084</b> | <b>0.058</b>  | <b>0.068</b>  | <b>-0.069</b> | <b>0.059</b>  | 0.023        | <b>-0.101</b> | <b>-0.122</b> |
| American anc. | 0.007         | <b>0.060</b>  | <b>0.069</b>  | <b>-0.087</b> | <b>-0.079</b> | <b>0.050</b>  | <b>-0.063</b> | -0.010       | <b>0.097</b>  | <b>0.125</b>  |

anc.= Continental ancestry estimated from the genetic data.

Sex coded as female=1, male=0.

Correlations with significant p-values (<0.001, Bonferroni-adjusted threshold) , obtained by permutation, are highlighted in bold.

Supplementary Table 3: Heritability for the ten pinna traits examined, estimated from the population SNP and trait data obtained here.

| <b>Trait</b>                          | <b>Heritability (%)</b> | <b>S.E. (%)</b> | <b>P-value</b> |
|---------------------------------------|-------------------------|-----------------|----------------|
| Ear Protrusion                        | 61.4                    | 7.3             | 1.00E-17       |
| Lobe Attachment                       | 30.5                    | 7.2             | 3.80E-14       |
| Lobe Size                             | 52.7                    | 6.9             | 1.00E-17       |
| Helix Rolling                         | 57.8                    | 6.7             | 1.00E-17       |
| Folding of Antihelix                  | 27.0                    | 6.7             | 1.51E-12       |
| Crus Helix Expression                 | 45.5                    | 8.2             | 3.49E-12       |
| Superior Crus of Antihelix Expression | 25.2                    | 6.4             | 4.41E-14       |
| Darwin's Tubercle                     | 25.6                    | 6.3             | 2.63E-12       |
| Tragus Size                           | 24.6                    | 6.6             | 2.44E-14       |
| Antitragus Size                       | 29.2                    | 7.6             | 7.36E-13       |

Supplementary Table 4:  $-\log_{10}(\text{p-values})$  for index SNPs obtained with mixed linear regression models.

P-values were obtained using random effects mixed linear regression models (using FastLMM) for all pinna traits and the seven index SNPs. The SNPs showing genome-wide significant association are the same as in the primary GWAS analysis. For comparison with Table 1, the table below shows  $-\log_{10}(\text{p-values})$ .

| SNP        | EP  | AS  | FoA | HR   | LA   | LS   | CHE | DT  | SCoAE | TS  |
|------------|-----|-----|-----|------|------|------|-----|-----|-------|-----|
| rs17023457 | 2.4 | 7.2 | 9.7 | 1.1  | 0.8  | 0.1  | 1.5 | 0.4 | 1.1   | 0.4 |
| rs3827760  | 8.0 | 0.1 | 1.6 | 10.9 | 7.3  | 11.1 | 0.5 | 0.4 | 0.3   | 3.8 |
| rs2080401  | 0.2 | 0.5 | 0.3 | 0.6  | 10.0 | 9.4  | 0.7 | 0.2 | 0.1   | 0.8 |
| rs10212419 | 0.1 | 0.4 | 0.1 | 1.1  | 1.3  | 12.4 | 0.1 | 2.1 | 0.0   | 1.8 |
| rs1960918  | 0.4 | 2.6 | 1.1 | 7.1  | 0.8  | 1.6  | 0.5 | 0.6 | 0.3   | 2.8 |
| rs263156   | 0.4 | 0.1 | 0.8 | 1.6  | 4.3  | 9.9  | 0.1 | 1.9 | 0.5   | 0.5 |
| rs1619249  | 1.4 | 0.4 | 7.1 | 1.5  | 0.1  | 0.6  | 1.3 | 0.3 | 0.0   | 0.9 |

## Supplementary Table 5: False discovery rate (FDR) test of association results

We performed a FDR (false discovery rate) test combining GWAS p-values from all 10 pinna traits examined. As FDR is less conservative than Bonferroni, its significance threshold here is  $9.55 \times 10^{-7}$  instead of  $5 \times 10^{-8}$ . A total of 128 SNPs were significant under FDR (listed below). These identify the same associated regions as in the primary GWAS analyses (the index SNPs of Table 1 are highlighted in bold below).

| Chromosome | Position         | SNP               | Trait                    | FDR p-value     |
|------------|------------------|-------------------|--------------------------|-----------------|
| 1          | 119029083        | rs17038321        | Fold of antihelix        | 5.37E-07        |
| 1          | 119030698        | rs10923574        | Fold of antihelix        | 4.10E-07        |
| 1          | 119117167        | rs10802043        | Fold of antihelix        | 3.28E-07        |
| 1          | 119153514        | rs2884876         | Fold of antihelix        | 3.88E-07        |
| 1          | 119188329        | rs2360627         | Fold of antihelix        | 2.69E-07        |
| 1          | 119193242        | rs2145789         | Fold of antihelix        | 2.24E-07        |
| 1          | 119226884        | rs10158862        | Fold of antihelix        | 4.48E-07        |
| 1          | 119253426        | rs2755140         | Fold of antihelix        | 7.39E-07        |
| 1          | 119259262        | rs6692676         | Fold of antihelix        | 4.40E-07        |
| 1          | 119289072        | rs10923662        | Fold of antihelix        | 4.18E-07        |
| 1          | 119291382        | rs1570816         | Fold of antihelix        | 4.92E-07        |
| 1          | 119300941        | rs9787392         | Fold of antihelix        | 6.86E-07        |
| 1          | 119316263        | rs10923673        | Fold of antihelix        | 7.09E-07        |
| 1          | 119318644        | rs10923674        | Fold of antihelix        | 7.54E-07        |
| 1          | 119392083        | rs868157          | Fold of antihelix        | 7.46E-07        |
| 1          | 119394195        | rs12408957        | Fold of antihelix        | 5.60E-07        |
| <b>1</b>   | <b>119875730</b> | <b>rs17023457</b> | <b>Fold of antihelix</b> | <b>8.21E-08</b> |
| <b>1</b>   | <b>119875730</b> | <b>rs17023457</b> | <b>Antitragus size</b>   | <b>3.73E-07</b> |
| 1          | 119928193        | rs3207643         | Fold of antihelix        | 4.63E-07        |
| 2          | 85545490         | rs7428            | Ear Protrusion           | 7.76E-07        |
| 2          | 108883866        | rs13388627        | Lobe Size                | 5.30E-07        |
| 2          | 108884042        | rs4638749         | Lobe Size                | 5.89E-07        |
| 2          | 108885895        | rs6542759         | Lobe Size                | 2.09E-07        |
| 2          | 108905048        | rs2305485         | Lobe Size                | 5.22E-07        |
| 2          | 108912673        | rs13410305        | Lobe Size                | 1.34E-07        |
| 2          | 108916044        | rs4149423         | Lobe Size                | 1.04E-07        |
| 2          | 108926967        | rs2198466         | Lobe Size                | 1.19E-07        |
| 2          | 108932436        | rs1989096         | Lobe Size                | 9.40E-07        |
| 2          | 108938552        | rs1879495         | Helix Rolling            | 3.66E-07        |
| 2          | 108938735        | rs12477830        | Helix Rolling            | 1.94E-07        |
| 2          | 108938735        | rs12477830        | Lobe Size                | 5.07E-07        |
| 2          | 108940336        | rs12476238        | Helix Rolling            | 1.64E-07        |
| 2          | 108940336        | rs12476238        | Lobe Size                | 5.82E-07        |
| 2          | 108946178        | rs6709159         | Helix Rolling            | 3.95E-07        |
| 2          | 108946860        | rs6709978         | Helix Rolling            | 8.13E-07        |
| 2          | 108946860        | rs6709978         | Lobe Size                | 8.66E-07        |
| 2          | 108988625        | rs10167564        | Lobe Size                | 4.55E-07        |



|          |                  |                  |                        |                 |
|----------|------------------|------------------|------------------------|-----------------|
| 2        | 108994808        | rs1402467        | Lobe Size              | 8.43E-07        |
| 2        | 108995325        | rs4149432        | Lobe Size              | 9.25E-07        |
| 2        | 108997262        | rs4149433        | Helix Rolling          | 3.73E-08        |
| 2        | 108997262        | rs4149433        | Lobe Size              | 5.22E-08        |
| 2        | 108997262        | rs4149433        | Ear Protrusion         | 1.79E-07        |
| 2        | 108997262        | rs4149433        | Lobe Attachment        | 3.36E-07        |
| 2        | 108999786        | rs4149436        | Lobe Size              | 6.04E-07        |
| 2        | 109002048        | rs4149438        | Lobe Size              | 9.48E-07        |
| 2        | 109004835        | rs17269356       | Lobe Size              | 8.73E-07        |
| 2        | 109006665        | rs13021399       | Lobe Size              | 3.13E-07        |
| 2        | 109006665        | rs13021399       | Ear Protrusion         | 4.25E-07        |
| 2        | 109028656        | rs6755756        | Lobe Size              | 8.28E-07        |
| 2        | 109055717        | rs10203795       | Ear Protrusion         | 5.15E-07        |
| 2        | 109055908        | rs10169264       | Ear Protrusion         | 5.75E-07        |
| 2        | 109055908        | rs10169264       | Helix Rolling          | 6.94E-07        |
| 2        | 109066424        | rs2378113        | Ear Protrusion         | 2.84E-07        |
| 2        | 109150164        | rs11123706       | Lobe Size              | 3.51E-07        |
| 2        | 109150164        | rs11123706       | Ear Protrusion         | 4.85E-07        |
| 2        | 109150164        | rs11123706       | Helix Rolling          | 7.16E-07        |
| 2        | 109156275        | rs6754683        | Ear Protrusion         | 7.69E-07        |
| 2        | 109156275        | rs6754683        | Helix Rolling          | 8.36E-07        |
| 2        | 109198530        | rs13413437       | Ear Protrusion         | 4.78E-07        |
| 2        | 109198530        | rs13413437       | Helix Rolling          | 8.51E-07        |
| <b>2</b> | <b>109513601</b> | <b>rs3827760</b> | <b>Helix Rolling</b>   | <b>2.98E-08</b> |
| <b>2</b> | <b>109513601</b> | <b>rs3827760</b> | <b>Lobe Size</b>       | <b>4.48E-08</b> |
| <b>2</b> | <b>109513601</b> | <b>rs3827760</b> | <b>Ear Protrusion</b>  | <b>1.27E-07</b> |
| <b>2</b> | <b>109513601</b> | <b>rs3827760</b> | <b>Lobe Attachment</b> | <b>2.31E-07</b> |
| 2        | 109544052        | rs13397666       | Lobe Attachment        | 6.42E-07        |
| 2        | 109552878        | rs13427222       | Lobe Attachment        | 4.70E-07        |
| 2        | 109552878        | rs13427222       | Lobe Size              | 7.31E-07        |
| 2        | 109556365        | rs6542787        | Lobe Size              | 4.33E-07        |
| 2        | 109556365        | rs6542787        | Lobe Attachment        | 6.27E-07        |
| 2        | 109557099        | rs260711         | Lobe Size              | 5.52E-07        |
| 2        | 109562495        | rs260714         | Lobe Size              | 7.61E-07        |
| 2        | 109566759        | rs260698         | Lobe Size              | 5.45E-07        |
| 2        | 109571440        | rs260705         | Lobe Size              | 6.57E-07        |
| 2        | 109579738        | rs260690         | Lobe Size              | 2.16E-07        |
| 2        | 109579738        | rs260690         | Helix Rolling          | 2.39E-07        |
| 2        | 109582357        | rs5021634        | Lobe Size              | 3.21E-07        |
| 2        | 109582357        | rs5021634        | Lobe Attachment        | 5.67E-07        |
| 2        | 109599256        | rs260674         | Tragus size            | 7.01E-07        |
| 2        | 109669494        | rs6737482        | Helix Rolling          | 1.57E-07        |
| 2        | 109674911        | rs383993         | Helix Rolling          | 2.91E-07        |
| 2        | 109706076        | rs4676237        | Helix Rolling          | 1.72E-07        |
| 2        | 109706076        | rs4676237        | Ear Protrusion         | 8.88E-07        |
| 2        | 109742307        | rs6542797        | Helix Rolling          | 9.10E-07        |
| 2        | 109754468        | rs7588387        | Helix Rolling          | 1.12E-07        |
| 2        | 109754468        | rs7588387        | Ear Protrusion         | 6.19E-07        |

|           |                  |                   |                                       |          |
|-----------|------------------|-------------------|---------------------------------------|----------|
| 2         | 109759168        | rs7567615         | Helix Rolling                         | 9.70E-08 |
| 2         | 109759168        | rs7567615         | Ear Protrusion                        | 9.03E-07 |
| 2         | 110381572        | rs10496434        | Helix Rolling                         | 9.18E-07 |
| 2         | 110399823        | rs7580778         | Lobe Size                             | 6.64E-07 |
| 2         | 171534221        | rs10192049        | Lobe Attachment                       | 2.76E-07 |
| 2         | 171534221        | rs10192049        | Lobe Size                             | 7.24E-07 |
| 2         | 171539261        | rs1035150         | Lobe Attachment                       | 1.87E-07 |
| 2         | 171539261        | rs1035150         | Lobe Size                             | 8.95E-07 |
| <b>2</b>  | <b>171540823</b> | <b>rs2080401</b>  | <b>Lobe Attachment</b>                | 5.97E-08 |
| <b>2</b>  | <b>171540823</b> | <b>rs2080401</b>  | <b>Lobe Size</b>                      | 1.42E-07 |
| 2         | 171548493        | rs7574074         | Lobe Attachment                       | 2.61E-07 |
| 2         | 171548493        | rs7574074         | Lobe Size                             | 3.06E-07 |
| 3         | 135281668        | rs7612415         | Lobe Size                             | 9.33E-07 |
| 3         | 138985300        | rs1602631         | Lobe Size                             | 7.98E-07 |
| 3         | 138997688        | rs9866054         | Lobe Size                             | 2.24E-08 |
| <b>3</b>  | <b>139004920</b> | <b>rs10212419</b> | <b>Lobe Size</b>                      | 7.46E-09 |
| 4         | 102276682        | rs6845263         | Superior Crus of antihelix expression | 8.06E-07 |
| 4         | 151188215        | rs1599167         | Helix Rolling                         | 6.49E-07 |
| 4         | 151204693        | rs11944163        | Helix Rolling                         | 6.34E-07 |
| <b>4</b>  | <b>151222266</b> | <b>rs1960918</b>  | <b>Helix Rolling</b>                  | 4.03E-07 |
| 4         | 151231371        | rs1813134         | Helix Rolling                         | 6.72E-07 |
| 4         | 151238436        | rs962626          | Helix Rolling                         | 5.00E-07 |
| 4         | 155397517        | rs4696584         | Fold of antihelix                     | 5.97E-07 |
| 4         | 155413362        | rs1873367         | Fold of antihelix                     | 8.58E-07 |
| 6         | 142879589        | rs605790          | Lobe Size                             | 8.95E-08 |
| 6         | 142879693        | rs702293          | Lobe Size                             | 7.46E-08 |
| 6         | 142882955        | rs263114          | Lobe Size                             | 2.54E-07 |
| <b>6</b>  | <b>142907515</b> | <b>rs263156</b>   | <b>Lobe Size</b>                      | 1.49E-08 |
| 6         | 142921498        | rs13217677        | Lobe Size                             | 1.49E-07 |
| 6         | 142922061        | rs2077836         | Lobe Size                             | 6.72E-08 |
| 6         | 142949260        | rs9373355         | Lobe Size                             | 2.98E-07 |
| 6         | 142965039        | rs6928084         | Lobe Size                             | 3.81E-07 |
| 6         | 142969570        | rs9390016         | Lobe Size                             | 6.79E-07 |
| 6         | 142976691        | rs7771119         | Lobe Size                             | 2.01E-07 |
| 6         | 142990718        | rs1396898         | Lobe Size                             | 3.43E-07 |
| 6         | 142993151        | rs7753052         | Lobe Size                             | 2.46E-07 |
| 7         | 28391047         | rs11772815        | Fold of antihelix                     | 7.91E-07 |
| 9         | 31394025         | rs7857709         | Lobe Size                             | 8.21E-07 |
| 9         | 31394275         | rs7873690         | Lobe Size                             | 9.55E-07 |
| 10        | 42917476         | rs2489715         | Helix Rolling                         | 7.83E-07 |
| 10        | 111635212        | rs3818285         | Superior Crus of antihelix expression | 8.80E-07 |
| <b>18</b> | <b>49190644</b>  | <b>rs1619249</b>  | <b>Fold of antihelix</b>              | 3.58E-07 |
| 18        | 55175143         | rs10503015        | Helix Rolling                         | 6.12E-07 |

Supplementary Table 6: Meta-analysis p-values for index SNPs associated with the pinna traits examined

Country-stratified meta-analysis p-values for the SNPs in Table 1 are shown below. Genome-wide significant associations are all replicated (here highlighted in red). Cochran's Q statistic was computed for each trait to test for effect size heterogeneity across countries, and the p-value was not significant in any case. Forest plots for each SNP are shown in Supplementary Figure 6A, and Manhattan plots in Figure 6B.

| Region  | SNP        | Ear Protrusion | Antitragus Size | Folding of Antihelix | Helix Rolling  | Lobe Attachment | Lobe Size      |
|---------|------------|----------------|-----------------|----------------------|----------------|-----------------|----------------|
| 1p12    | rs17023457 | 1.7E-03        | <b>3.1E-08</b>  | <b>3.0E-11</b>       | 2.6E-02        | 2.7E-01         | 4.1E-01        |
| 2q12.3  | rs3827760  | <b>5.8E-09</b> | 7.5E-01         | 1.7E-02              | <b>2.8E-11</b> | <b>1.3E-07</b>  | <b>3.6E-13</b> |
| 2q31.1  | rs2080401  | 6.3E-01        | 3.8E-01         | 2.8E-01              | 2.0E-01        | <b>1.9E-11</b>  | <b>4.8E-11</b> |
| 3q23    | rs10212419 | 5.7E-01        | 2.5E-01         | 8.2E-01              | 6.9E-02        | 6.5E-02         | <b>5.6E-12</b> |
| 4q31.3  | rs1960918  | 6.1E-01        | 3.1E-03         | 9.8E-02              | <b>2.1E-07</b> | 1.4E-01         | 4.0E-02        |
| 6q24.2  | rs263156   | 5.1E-01        | 8.6E-01         | 1.2E-01              | 9.5E-03        | 1.1E-05         | <b>1.6E-12</b> |
| 18q21.2 | rs1619249  | 5.7E-02        | 2.7E-01         | <b>1.8E-07</b>       | 4.9E-02        | 5.9E-01         | 5.6E-01        |

Sex- stratified Meta-analysis p-values for the same set of SNPs and traits. Only the previously identified associations are shown. Manhattan plots are shown in Supplementary Figure 6C.

| Region  | SNP        | Ear Protrusion | Antitragus Size | Folding of Antihelix | Helix Rolling | Lobe Attachment | Lobe Size |
|---------|------------|----------------|-----------------|----------------------|---------------|-----------------|-----------|
| 1p12    | rs17023457 |                | 1.0E-07         | 5.6E-11              |               |                 |           |
| 2q12.3  | rs3827760  | 2.0E-09        |                 |                      | 1.3E-12       | 4.6E-08         | 4.6E-13   |
| 2q31.1  | rs2080401  |                |                 |                      |               | 3.2E-11         | 7.6E-11   |
| 3q23    | rs10212419 |                |                 |                      |               |                 | 1.3E-12   |
| 4q31.3  | rs1960918  |                |                 |                      | 7.9E-07       |                 |           |
| 6q24.2  | rs263156   |                |                 |                      |               |                 | 3.8E-11   |
| 18q21.2 | rs1619249  |                |                 | 2.8E-08              |               |                 |           |

### Supplementary Table 7: Prediction of pinna traits from the genotypes at the seven index SNPs

We predicted phenotypes from the genotypes at the seven index SNPs in Table 1 (with an additive encoding of the minor allele: i.e. 0, 1 or 2 copies) using linear regression or neural network modelling and including the same covariates as for the GWAS (age, sex, height, BMI). The accuracy of this prediction was evaluated by examining the correlation between the observed and predicted trait scores. The neural network model being nonlinear provides slightly greater prediction accuracy.

| Trait                                 | Correlation         |                       |
|---------------------------------------|---------------------|-----------------------|
|                                       | <u>Linear model</u> | <u>Neural network</u> |
| Ear Protrusion                        | 41.4                | 43.6                  |
| Lobe Attachment                       | 20.5                | 26.0                  |
| Lobe Size                             | 30.5                | 33.5                  |
| Helix Rolling                         | 35.0                | 37.0                  |
| Folding of Antihelix                  | 23.0                | 28.2                  |
| Crus Helix Expression                 | 20.0                | 23.9                  |
| Superior Crus of Antihelix Expression | 14.1                | 17.4                  |
| Darwin's Tubercle                     | 19.4                | 24.9                  |
| Tragus Size                           | 20.2                | 26.1                  |
| Antitragus Size                       | 17.5                | 18.6                  |

Supplementary Table 8: Derived allele frequency (A) and effect size (B) for index SNPs showing genome-wide significant association with pinna shape.

**A)**

Supplementary Table 8A below identifies the ancestral and derived alleles, and presents the derived allele frequency for each SNP in several populations at each index SNP of Table 1 (main text). Intensity of orange color is graded for increasing derived allele frequency. Population acronyms: CEU (U.S. residents with northern and western European ancestry), YRI (Yoruba of Ibadan, Nigeria), CHB (Han Chinese in Beijing, China), JPT (Japanese in Tokyo, Japan) and MEX (Mexican ancestry in Los Angeles, California). Allele frequencies for these HAPMAP samples were obtained from dbSNP (<http://www.ncbi.nlm.nih.gov/SNP/>). NAM denotes a set of Native Americans genotyped here. Candela denotes the GWAS study sample characterized here.

| Region  | SNP        | Ancestral allele | Derived allele | NAM  | CEU  | YRI  | CHB  | JPT  | MEX  | Candela |
|---------|------------|------------------|----------------|------|------|------|------|------|------|---------|
| 1p12    | rs17023457 | T                | C              | 0.74 | 0.15 | 0.00 | 0.44 | 0.44 | 0.41 | 0.39    |
| 2q12.3  | rs3827760  | A                | G              | 0.98 | 0.00 | 0.00 | 0.94 | 0.80 | 0.42 | 0.40    |
| 2q31.1  | rs2080401  | A                | C              | 0.88 | 0.32 | 0.39 | 0.37 | 0.25 | 0.54 | 0.60    |
| 3q23    | rs10212419 | G                | A              | 0.94 | 0.21 | 0.09 | 0.46 | 0.41 | 0.54 | 0.52    |
| 4q31.3  | rs1960918  | G                | A              | 0.32 | 0.64 | 0.46 | 0.26 | 0.35 | 0.32 | 0.43    |
| 6q24.2  | rs263156   | A                | C              | 0.88 | 0.56 | 0.02 | 0.73 | 0.79 | 0.66 | 0.67    |
| 18q21.2 | rs1619249  | G                | A              | 0.65 | 0.85 | 0.51 | 0.52 | 0.42 | 0.81 | 0.81    |

**B)**

Supplementary Table 8B presents the phenotypic effect size (i.e. beta regression coefficient) for the derived allele at each significantly associated SNP from Table 1 of the main text. Increasing expression of each trait was scored numerically as 0, 1 or 2 (Supplementary Figure 1). To aid interpretation of the phenotypic effects of the associated alleles, below we refer qualitatively to the phenotypic value range for each trait.

| Region  | SNP        | Derived allele | Ear Protrusion (flat – protruded) | Antitragus Size (small – large) | Folding of Antihelix (weak – prominent) | Helix Rolling (weak – prominent) | Lobe Attachment (attached – detached) | Lobe Size (small – large) |
|---------|------------|----------------|-----------------------------------|---------------------------------|-----------------------------------------|----------------------------------|---------------------------------------|---------------------------|
| 1p12    | rs17023457 | C              |                                   | -0.060                          | -0.087                                  |                                  |                                       |                           |
| 2q12.3  | rs3827760  | G              | -0.108                            |                                 |                                         | -0.103                           | -0.066                                | -0.117                    |
| 2q31.1  | rs2080401  | C              |                                   |                                 |                                         |                                  | -0.071                                | -0.096                    |
| 3q23    | rs10212419 | A              |                                   |                                 |                                         |                                  |                                       | 0.107                     |
| 4q31.3  | rs1960918  | A              |                                   |                                 |                                         | -0.066                           |                                       |                           |
| 6q24.2  | rs263156   | C              |                                   |                                 |                                         |                                  |                                       | 0.109                     |
| 18q21.2 | rs1619249  | A              |                                   |                                 | 0.091                                   |                                  |                                       |                           |

Supplementary Table 9: Intraclass correlations coefficients (ICCs) of pinna trait scores.

We calculated the ICC for pinna trait scores following the definition of Shrout & Fleiss (1979). This approach uses a two-way mixed effects ANOVA model, with two scores for an individual (from double scoring by one rater or from scores by two raters) as a fixed effect, and variation across individuals as a random effect. Scores from a set of photographs for 100 individuals were used for calculating ICCs for each pinna trait phenotyped. The photographs were scored twice by two raters, independently, two weeks apart.

| Trait                                 | ICC                     |                         |                       |
|---------------------------------------|-------------------------|-------------------------|-----------------------|
|                                       | <u>Intra-observer-1</u> | <u>Intra-observer-2</u> | <u>Inter-observer</u> |
| Ear Protrusion                        | 81%                     | 53%                     | 69%                   |
| Lobe attachment                       | 68%                     | 73%                     | 54%                   |
| Lobe size                             | 65%                     | 66%                     | 62%                   |
| Helix rolling                         | 59%                     | 70%                     | 43%                   |
| Crus helix expression                 | 55%                     | 45%                     | 40%                   |
| Superior Crus of antihelix expression | 52%                     | 66%                     | 43%                   |
| Folding of antihelix                  | 54%                     | 57%                     | 59%                   |
| Darwin's tubercle                     | 61%                     | 85%                     | 73%                   |
| Tragus size                           | 40%                     | 51%                     | 58%                   |
| Antitragus size                       | 50%                     | 71%                     | 59%                   |

Ref: Supplementary Reference 3.



Supplementary Table 10: Reliability analysis of mouse landmarking

The top head view photographs were landmarked separately by two raters, and for each landmark the average distance between two points placed by two different raters was calculated across all samples. The values for each landmark are shown below (in pixel units). Average head size was 479 pixels in length ( $\pm 24$ ), so the magnitude of fluctuation is 1% or lower.

| Landmark | Variation (pixels) |
|----------|--------------------|
| 1        | 0.22               |
| 2        | 0.47               |
| 3        | 4.44               |
| 4        | 2.50               |
| 5        | 2.29               |
| 6        | 1.30               |
| 7        | 1.47               |
| 8        | 0.41               |
| 9        | 0.17               |
| 10       | 0.25               |

The side view photographs were similarly landmarked by two raters, and average deviation between two raters are given below for each landmark (in pixel units). Average head size was 632 pixels ( $\pm 31$ ). The landmarks are shown in black while semi-landmarks are shown in gray. As expected, semi-landmarks have higher deviation because unlike landmarks they are not defined to be placed on a specific point, rather on any part of the contour of pinna.

| Landmark | Variation (pixels) |
|----------|--------------------|
| 1        | 7.70               |
| 2        | 5.42               |
| 3        | 4.84               |
| 4        | 8.59               |
| 5        | 7.59               |
| 6        | 7.90               |
| 7        | 9.97               |
| 8        | 11.01              |
| 9        | 12.40              |
| 10       | 12.53              |
| 11       | 15.24              |
| 12       | 11.57              |
| 13       | 10.38              |
| 14       | 11.30              |
| 15       | 11.40              |
| 16       | 11.57              |
| 17       | 14.06              |
| 18       | 13.39              |

|    |       |
|----|-------|
| 19 | 8.64  |
| 20 | 7.90  |
| 21 | 7.28  |
| 22 | 15.53 |
| 23 | 16.92 |
| 24 | 22.04 |
| 25 | 18.53 |
| 26 | 16.19 |
| 27 | 17.16 |

## SUPPLEMENTARY NOTES

### Supplementary Note 1: Effect of *Edar* genotype on mutant mouse pinna morphology.

We compared pinna morphology between wild-type and mutant mice. The loss of function *Edar*<sup>dII</sup> line carries the downless Jackson allele (encoding *Edar* p. E379K). The gain of function *Edar*<sup>Tg951</sup> line carries approximately 16 copies of the *Edar* gene copies of the entire *Edar* locus on a 200 Kb yeast artificial chromosome (homozygous transgenic animals therefore carry about 34 copies of the gene in total). A multivariate linear regression analysis was performed in which the *EDAR* locus genotypes were considered a binary variable: *Edar*<sup>dII</sup>/*Edar*<sup>dII</sup> homozygotes were considered as level 1 and the other 3 genotypes were grouped into level 0. This choice was supported by inspection of the boxplots in Supplementary Figure 11, where only the homozygous *Edar*<sup>dII</sup> category seems distinct. Output from the analyses performed in R is provided below. For confirmation, a regression analysis in which each genotype is considered a separate factor produced similar results (not shown).

#### Regression of ear protrusion angle vs. genotype

Call:

```
lm(formula = angle ~ age + sex + homo + body_length +  
weight + head_length + head_width, data = mice)
```

Coefficients:

|             | Estimate | Std. Error | t value | Pr(> t ) |     |
|-------------|----------|------------|---------|----------|-----|
| (Intercept) | 14.026   | 130.701    | 0.107   | 0.915170 |     |
| age         | 7.697    | 7.351      | 1.047   | 0.302450 |     |
| sexF        | 6.139    | 5.487      | 1.119   | 0.271028 |     |
| homo        | -33.785  | 7.833      | -4.313  | 0.000131 | *** |
| body_length | -3.025   | 2.156      | -1.403  | 0.169714 |     |
| weight      | 6.201    | 5.480      | 1.132   | 0.265735 |     |
| head_length | 5.947    | 4.882      | 1.218   | 0.231536 |     |
| head_width  | 5.015    | 7.569      | 0.663   | 0.512117 |     |

---

Signif. codes: 0 '\*\*\*' 0.001 '\*\*' 0.01 '\*' 0.05 '.' 0.1 ' ' 1

Residual standard error: 16.45 on 34 degrees of freedom

Multiple R-squared: 0.56, Adjusted R-squared: 0.4694

F-statistic: 6.181 on 7 and 34 DF, p-value: 0.0001042

#### Analysis of Variance Table

Response: angle

|             | Df | Sum Sq | Mean Sq | F value | Pr(>F)    |     |
|-------------|----|--------|---------|---------|-----------|-----|
| age         | 1  | 408.7  | 408.7   | 1.5094  | 0.22766   |     |
| sexF        | 1  | 673.1  | 673.1   | 2.4861  | 0.12412   |     |
| homo        | 1  | 8945.2 | 8945.2  | 33.0364 | 1.832e-06 | *** |
| body_length | 1  | 57.0   | 57.0    | 0.2104  | 0.64935   |     |
| weight      | 1  | 1048.0 | 1048.0  | 3.8705  | 0.05734   | .   |

```

head_length 1 464.1 464.1 1.7139 0.19926
head_width 1 118.8 118.8 0.4389 0.51212
Residuals 34 9206.1 270.8
---
Signif. codes: 0 '***' 0.001 '**' 0.01 '*' 0.05 '.' 0.1 ' ' 1

```

Regression of ear tip distance (as a proportion of head width) vs. genotype categories:

R regression output:

```
lm(formula = tip_prop ~ age + sex + homo + body_length + weight +
    head_length + head_width, data = mice)
```

```
Residuals:
    Min       1Q   Median       3Q      Max
-0.37794 -0.07331  0.01781  0.11324  0.24070
```

```
Coefficients:
            Estimate Std. Error t value Pr(>|t|)
(Intercept)  0.761260   1.298694   0.586 0.561630
age           0.042402   0.073039   0.581 0.565383
sexF         0.049551   0.054521   0.909 0.369833
homo        -0.311210   0.077832  -3.998 0.000325 ***
body_length -0.005454   0.021425  -0.255 0.800603
weight       0.003212   0.054447   0.059 0.953307
head_length  0.065453   0.048511   1.349 0.186179
head_width  -0.019124   0.075209  -0.254 0.800811
---
Signif. codes: 0 '***' 0.001 '**' 0.01 '*' 0.05 '.' 0.1 ' ' 1
```

```
Residual standard error: 0.1635 on 34 degrees of freedom
Multiple R-squared: 0.4713, Adjusted R-squared: 0.3624
F-statistic: 4.329 on 7 and 34 DF, p-value: 0.001609
```

Analysis of Variance Table

```
Response: tip_prop
      Df Sum Sq Mean Sq F value Pr(>F)
age     1 0.00053 0.00053  0.0198  0.8890
sexF    1 0.05664 0.05664  2.1188  0.1547
homo    1 0.69762 0.69762 26.0955 1.243e-05 ***
body_length 1 0.00157 0.00157  0.0587  0.8100
weight  1 0.00494 0.00494  0.1847  0.6701
head_length 1 0.04715 0.04715  1.7638  0.1930
head_width 1 0.00173 0.00173  0.0647  0.8008
Residuals 34 0.90893 0.02673
---
Signif. codes: 0 '***' 0.001 '**' 0.01 '*' 0.05 '.' 0.1 ' ' 1
```

## Regression of 2D pinna landmarks PC1 vs. genotype categories:

R regression output:

Call:

```
lm(formula = PC1 ~ age + sex + homo + body_length +  
    weight + head_length + head_width, data = mice)
```

Coefficients:

|             | Estimate  | Std. Error | t value | Pr(> t )     |
|-------------|-----------|------------|---------|--------------|
| (Intercept) | 0.492906  | 0.798958   | 0.617   | 0.541387     |
| age         | -0.032081 | 0.044934   | -0.714  | 0.480125     |
| sexF        | -0.019749 | 0.033541   | -0.589  | 0.559895     |
| homo        | -0.181051 | 0.047882   | -3.781  | 0.000603 *** |
| body_length | -0.009849 | 0.013181   | -0.747  | 0.460062     |
| weight      | 0.051592  | 0.033496   | 1.540   | 0.132759     |
| head_length | 0.010397  | 0.029844   | 0.348   | 0.729710     |
| head_width  | -0.042692 | 0.046269   | -0.923  | 0.362671     |

---

Signif. codes: 0 '\*\*\*' 0.001 '\*\*' 0.01 '\*' 0.05 '.' 0.1 ' ' 1

Residual standard error: 0.1006 on 34 degrees of freedom

Multiple R-squared: 0.5355, Adjusted R-squared: 0.4398

F-statistic: 5.599 on 7 and 34 DF, p-value: 0.0002365

Analysis of Variance Table

Response: PC1

|             | Df | Sum Sq  | Mean Sq  | F value | Pr(>F)        |
|-------------|----|---------|----------|---------|---------------|
| age         | 1  | 0.04427 | 0.044273 | 4.3757  | 0.0440 *      |
| sexF        | 1  | 0.00003 | 0.000030 | 0.0030  | 0.9567        |
| homo        | 1  | 0.30350 | 0.303503 | 29.9970 | 4.123e-06 *** |
| body_length | 1  | 0.01783 | 0.017831 | 1.7624  | 0.1932        |
| weight      | 1  | 0.02173 | 0.021734 | 2.1481  | 0.1519        |
| head_length | 1  | 0.00057 | 0.000569 | 0.0563  | 0.8139        |
| head_width  | 1  | 0.00861 | 0.008614 | 0.8514  | 0.3627        |
| Residuals   | 34 | 0.34401 | 0.010118 |         |               |

---

Signif. codes: 0 '\*\*\*' 0.001 '\*\*' 0.01 '\*' 0.05 '.' 0.1 ' ' 1

## SUPPLEMENTARY REFERENCES

1. Alexander DH, Novembre J, Lange K (2009) Fast model-based estimation of ancestry in unrelated individuals. *Genome Res* 19: 1655-1664.
2. Ruiz-Linares et al., Admixture In Latin America: Geographic Structure, Phenotypic Diversity And Self-Perception Of Ancestry Based On 7,342 Individuals. *PLoS Genetics*, 2014.
3. P. E. Shrout & Joseph L. Fleiss (1979). "Intraclass Correlations: Uses in Assessing Rater Reliability". *Psychological Bulletin* 86 (2): 420–428.
